# Supplementary material for: Substrate-directed divergent annulations of sulfur ylides: synthesis of functionalized bispirocyclopentane and bispirocyclopropane derivatives
Source: Royal Society of Chemistry journal article supplement (doi:10.1039/d4ob00146j), 2024-01-01

## Supporting Information

### Substrate-directed divergent annulations of sulfur ylides: synthesis of functionalized bispirocyclopentane and bispirocyclopropane derivatives

Siyi Chen,<sup>‡a</sup> Peiyao Liang,<sup>‡a</sup> Yilin Cai,<sup>b</sup> Liejin Zhou,<sup>\*b</sup> and Shoulei Wang<sup>\*a</sup>

- a. Strait Institute of Flexible Electronics (SIFE, Future Technologies), Fujian Key Laboratory of Flexible Electronics, Fujian Normal University and Strait Laboratory of Flexible Electronics (SLoFE), Fuzhou 350117, China
- b. Key Laboratory of the Ministry of Education for Advanced Catalysis Materials, Department of Chemistry, Zhejiang Normal University, Jinhua 321004, China.

‡ These authors contributed equally to this work.

ljzhou@zjnu.cn; ifeshlwang@fjnu.edu.cn

### Table of Contents

|                                                              |     |
|--------------------------------------------------------------|-----|
| 1. General information                                       | S1  |
| 2. Screening of reaction conditions for the [2+3] annulation | S2  |
| 3. Screening of reaction conditions for the [2+1] annulation | S3  |
| 4. General procedure for the synthesis of <b>3</b>           | S4  |
| 5. General procedure for the synthesis of <b>5</b>           | S4  |
| 6. General procedure for the multi-component reaction        | S5  |
| 7. Scale-up synthesis and deprotection of <b>5f</b>          | S5  |
| 8. Stereochemistry determination and X-ray structures        | S6  |
| 9. Compound characterization                                 | S7  |
| 10. References                                               | S23 |
| 11. <sup>1</sup> H and <sup>13</sup> C NMR spectra           | S24 |

## 1. General information

Commercially available materials purchased from Alfa Aesar or Sigma-Aldrich were used as received. Proton nuclear magnetic resonance ( $^1\text{H}$  NMR) spectra were recorded on a JEOL (600 MHz) spectrometer. Chemical shifts were recorded in parts per million (ppm,  $\delta$ ) relative to tetramethylsilane ( $\delta$  0.00) or chloroform ( $\delta$  = 7.26, singlet).  $^1\text{H}$  NMR splitting patterns are designated as s (singlet), d (doublet), t (triplet), q (quartet), dd (doublet of doublets); m (multiplet), and etc. All first-order splitting patterns were assigned on the basis of the appearance of the multiplet. Splitting patterns that could not be easily interpreted are designated as m (multiplet) or br (broad). Carbon nuclear magnetic resonance ( $^{13}\text{C}$  NMR) spectra were recorded on a JEOL (151 MHz) spectrometer. High resolution mass spectral analysis (HRMS) was performed on Finnigan MAT 95 XP mass spectrometer (Thermo Electron Corporation). X-ray crystallography analysis was performed on Bruker X8 APEX X-ray diffractionmeter. Analytical thin-layer chromatography (TLC) was carried out on Merck 60 F254 pre-coated silica gel plate (0.2 mm thickness). Visualization was performed using a UV lamp.

## 2. Screening of conditions for the [2+3] annulation<sup>[a]</sup>

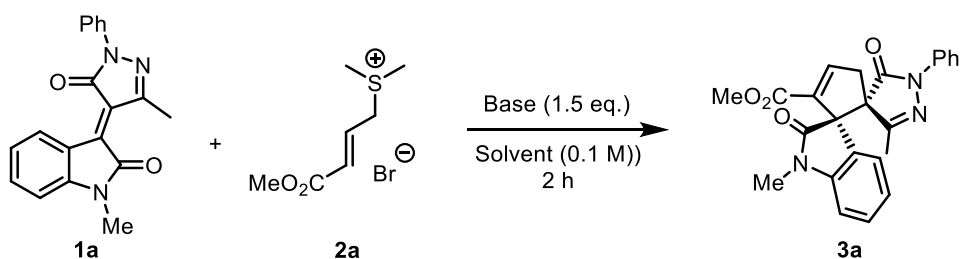

| Entry             | Base                               | Solvent                         | Temp(°C)  | Yield (%) <sup>[b]</sup> | dr <sup>[c]</sup> |
|-------------------|------------------------------------|---------------------------------|-----------|--------------------------|-------------------|
| 1                 | K <sub>2</sub> CO <sub>3</sub>     | CH <sub>2</sub> Cl <sub>2</sub> | rt        | 81                       | >20:1             |
| 2                 | K <sub>2</sub> CO <sub>3</sub>     | THF                             | rt        | 42                       | >20:1             |
| 3                 | K <sub>2</sub> CO <sub>3</sub>     | Toluene                         | rt        | 12                       | -                 |
| 4                 | K <sub>2</sub> CO <sub>3</sub>     | DMF                             | rt        | 43                       | >20:1             |
| 5                 | K <sub>2</sub> CO <sub>3</sub>     | MeOH                            | rt        | 39                       | >20:1             |
| <b>6</b>          | <b>K<sub>2</sub>CO<sub>3</sub></b> | <b>MeCN</b>                     | <b>rt</b> | <b>92</b>                | <b>&gt;20:1</b>   |
| 7                 | Na <sub>2</sub> CO <sub>3</sub>    | MeCN                            | rt        | 47                       | >20:1             |
| 8                 | Cs <sub>2</sub> CO <sub>3</sub>    | MeCN                            | rt        | 68                       | >20:1             |
| 9                 | DBU                                | MeCN                            | rt        | 35                       | -                 |
| 10                | DABCO                              | MeCN                            | rt        | 34                       | -                 |
| 11                | Et <sub>3</sub> N                  | MeCN                            | rt        | 70                       | >20:1             |
| 12                | DMAP                               | MeCN                            | rt        | 40                       | >20:1             |
| 13                | NaOH                               | MeCN                            | rt        | 15                       | -                 |
| 14                | K <sub>2</sub> CO <sub>3</sub>     | MeCN                            | 0         | 40                       | >20:1             |
| 15                | K <sub>2</sub> CO <sub>3</sub>     | MeCN                            | 50        | 91                       | >20:1             |
| 15 <sup>[d]</sup> | K <sub>2</sub> CO <sub>3</sub>     | MeCN                            | rt        | 85                       | >20:1             |

[a] General conditions (unless otherwise specified): **1a** (0.1 mmol), **2a** (0.15 mmol), Base (1.5 equiv), solvent (1.0 mL), rt, 2 h. [b] Isolated yield. [c] The diastereomeric ratio was determined by <sup>1</sup>H NMR spectroscopy. [d] 1.0 eq. K<sub>2</sub>CO<sub>3</sub> was used

### 3. Screening of conditions for the [2+1] annulation <sup>[a]</sup>

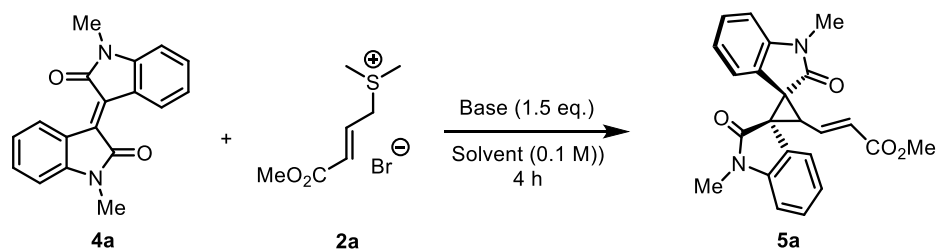

| Entry    | Base                                | Solvent                         | Temp(°C)  | Yield (%) <sup>[b]</sup> | E:Z <sup>[c]</sup> |
|----------|-------------------------------------|---------------------------------|-----------|--------------------------|--------------------|
| 1        | K <sub>2</sub> CO <sub>3</sub>      | CH <sub>2</sub> Cl <sub>2</sub> | rt        | 62                       | >20:1              |
| 2        | K <sub>2</sub> CO <sub>3</sub>      | THF                             | rt        | 88                       | >20:1              |
| 3        | K <sub>2</sub> CO <sub>3</sub>      | Toluene                         | rt        | <15                      | -                  |
| 4        | K <sub>2</sub> CO <sub>3</sub>      | DMF                             | rt        | 80                       | >20:1              |
| 5        | K <sub>2</sub> CO <sub>3</sub>      | MeOH                            | rt        | <10                      | >20:1              |
| 6        | K <sub>2</sub> CO <sub>3</sub>      | MeCN                            | rt        | 71                       | >20:1              |
| 7        | Na <sub>2</sub> CO <sub>3</sub>     | THF                             | rt        | 51                       | >20:1              |
| <b>8</b> | <b>Cs<sub>2</sub>CO<sub>3</sub></b> | <b>THF</b>                      | <b>rt</b> | <b>93</b>                | <b>&gt;20:1</b>    |
| 9        | DBU                                 | THF                             | rt        | 90                       | >20:1              |
| 10       | DABCO                               | THF                             | rt        | 42                       | -                  |
| 11       | Et <sub>3</sub> N                   | THF                             | rt        | 38                       | -                  |
| 12       | NaOH                                | THF                             | rt        | 45                       | -                  |
| 13       | Cs <sub>2</sub> CO <sub>3</sub>     | THF                             | 0         | 45                       | >20:1              |
| 14       | Cs <sub>2</sub> CO <sub>3</sub>     | THF                             | 50        | 90                       | >20:1              |

[a] General conditions (unless otherwise specified): **4a** (0.1 mmol), **2a** (0.15 mmol), Base (1.5 equiv), solvent (1.0 mL), rt, 4 h. [b] Isolated yield. [c] The E:Z ratio was determined by <sup>1</sup>H NMR spectroscopy.

#### 4. General procedure for the synthesis of **3**

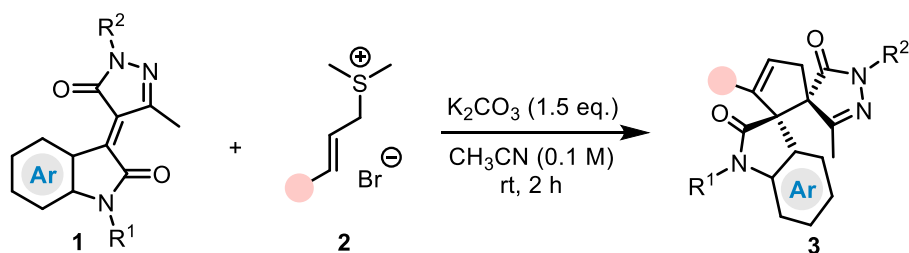

To a solution of oxindole-derived pyrazolones **1**<sup>[1]</sup> (0.10 mmol, 1.0 equiv.) in MeCN (1.0 mL) were added the sulfonium salts **2** (0.15 mmol, 1.5 equiv.) and K<sub>2</sub>CO<sub>3</sub> (0.15 mmol, 1.5 equiv.). The reaction mixture was stirred at room temperature 2 h and monitored by TLC. After that solvent removal in vacuo gave the crude product **3**, which was directly purified by flash chromatography (FC). The yield of cycloaddition products **3** and diastereomeric ratio were determined at this stage.

#### 5. General procedure for the synthesis of **5**

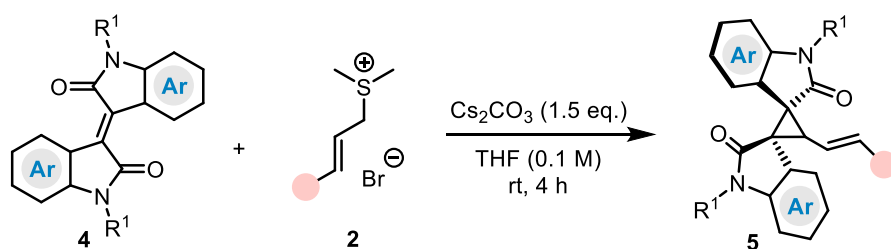

To a solution of isoindigos **4**<sup>[2]</sup> (0.10 mmol, 1.0 equiv.) in THF (1.0 mL) were added the sulfonium salts **2** (0.15 mmol, 1.5 equiv.) and Cs<sub>2</sub>CO<sub>3</sub> (0.15 mmol, 1.5 equiv.). The reaction mixture was stirred at room temperature 4 h and monitored by TLC. After that solvent removal in vacuo gave the crude product **5**, which was directly purified by flash chromatography (FC). The yield of [2+1] annulation adducts **5** were determined at this stage and the structure were confirmed by <sup>1</sup>H NMR, <sup>13</sup>C NMR spectrum.

## 6. General procedure for the multi-component reaction

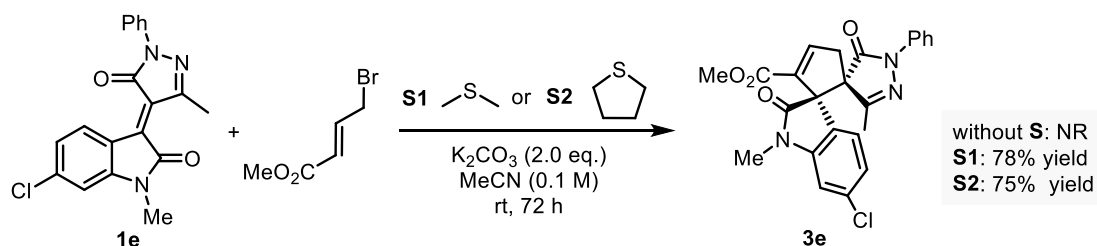

To a solution of **1e** (0.10 mmol, 35.1 mg, 1.0 equiv.) in MeCN (1.0 mL) were added the thioether **S** (0.6 mmol, 6.0 equiv.), methyl-4-bromobut-2-enoate (0.2 mmol, 35.8 mg, 2.0 equiv.) and K<sub>2</sub>CO<sub>3</sub> (0.20 mmol, 27.6 mg, 2.0 equiv.). The reaction mixture was stirred at room temperature 72 h and monitored by TLC. After the given reaction time, solvent removal in vacuo gave the crude product **3e**, which was directly purified by flash chromatography (FC).

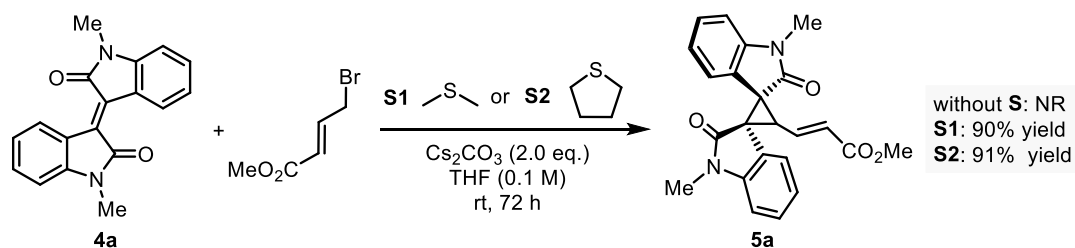

To a solution of or **4a** (0.10 mmol, 29.0 mg, 1.0 equiv.) in THF (1.0 mL) were added the thioether **S** (0.6 mmol, 6.0 equiv.), methyl-4-bromobut-2-enoate (0.2 mmol, 35.8 mg, 2.0 equiv.) and Cs<sub>2</sub>CO<sub>3</sub> (0.20 mmol, 65.1 mg, 2.0 equiv.). The reaction mixture was stirred at room temperature 72 h and monitored by TLC. After the given reaction time, solvent removal in vacuo gave the crude product or **5a**, which was directly purified by flash chromatography (FC).

## 7. Scale-up synthesis and deprotection of 5f

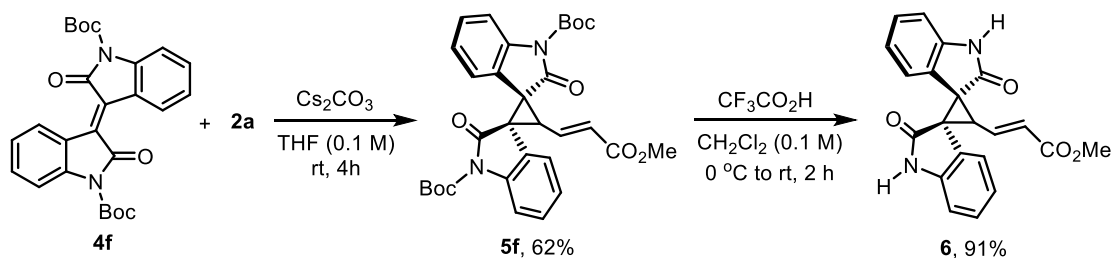

To a solution of Isoindigos **4f** (1.0 mmol, 462.5 mg, 1.0 equiv.) in THF (10.0 mL) were added the sulfonium salts **2a** (1.5 mmol, 361.5 mg, 1.5 equiv.) and Cs<sub>2</sub>CO<sub>3</sub> (1.5 mmol, 488.7 mg, 1.5 equiv.). The reaction mixture was stirred at room temperature 4 h and monitored by TLC. After that solvent removal in vacuo gave the crude product **5**, which was directly purified by flash chromatography (FC). The [2+1] annulation adducts **5f** were isolated in 62% yield (347.2 mg).

To a solution of cycloaddition products **5f** (0.5 mmol, 280.0 mg, 1.0 equiv.) in CH<sub>2</sub>Cl<sub>2</sub> (5.0 mL) was added CF<sub>3</sub>COOH (2.5 mmol, 185.7 μL, 5.0 equiv.) at 0 °C, maintaining the temperature and stirring for 30 minutes. After that, the reaction was allowed to stir at room temperature for another 2 h. The solvent was then removed in vacuo and the residue was purified by flash column chromatography to give the desired deprotection product **6** (91% yield, 163.8 mg) as a white solid.

## 8. Stereochemistry determination and X-ray structures

Configurations of the products **3** were assigned based on the crystal X-ray structure of **3a** (CCDC number 2305021) which was obtained as colorless solid *via* evaporation of a hexane/CH<sub>2</sub>Cl<sub>2</sub> solution.

Configurations of the products **5** were assigned based on the crystal X-ray structure of **5a** (CCDC number 2305023) which was obtained as colorless needles *via* evaporation of a hexane/CH<sub>2</sub>Cl<sub>2</sub> solution.

These data can be obtained free of charge from The Cambridge Crystallographic Data Centre via [www.ccdc.cam.ac.uk/data\\_request/cif](http://www.ccdc.cam.ac.uk/data_request/cif).

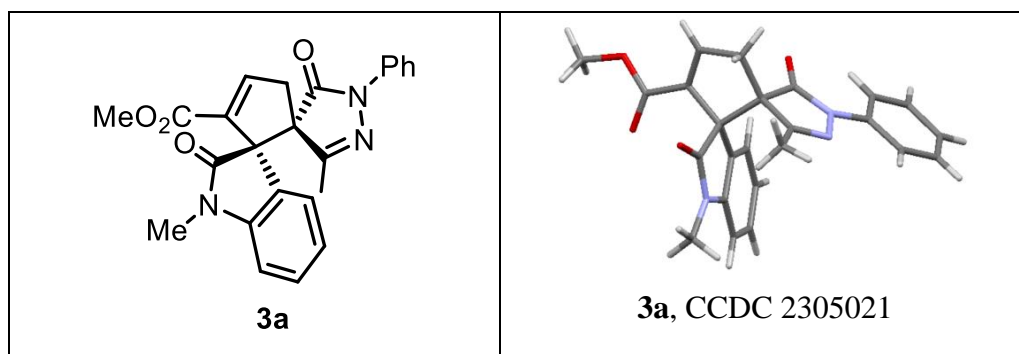

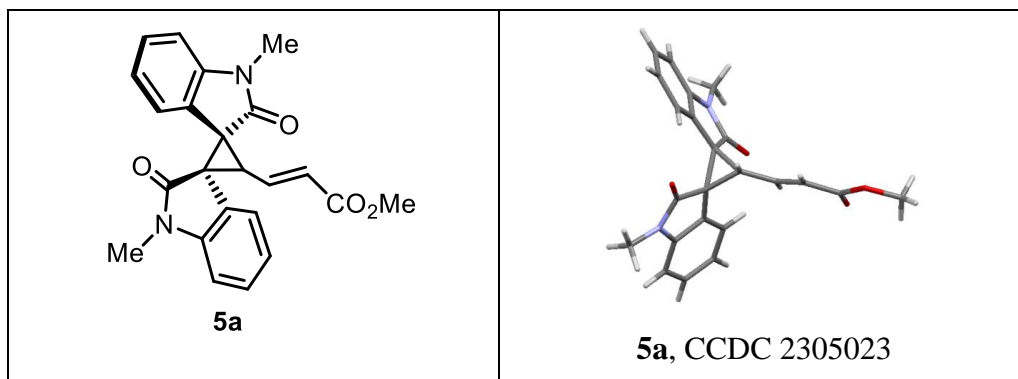

## 9. Compound characterization

### Methyl 1,3''-dimethyl-2,5''-dioxo-1''-phenyl-1'',5''-dihydrodispiro[indoline-3,2'-cyclopentane-1',4''-pyrazol]-3'-ene-3'-carboxylate

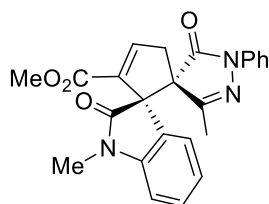

Cycloaddition product **3a** was prepared as described in section 4 and isolated by FC on silica (eluting with PE/EA from 10:1 to 2:1) in 92% yield (38.1 mg, >20:1 dr). White solid, melting point: 160-161 °C. <sup>1</sup>H NMR (600 MHz, CDCl<sub>3</sub>): δ = 2.23 (s, 3H), 3.08 (dd, *J* = 1.8, 8.1 Hz, 2H), 3.21 (s, 3H), 3.59 (s, 3H), 6.79 (d, *J* = 7.2 Hz, 1H), 6.97 (t, *J* = 7.2 Hz, 1H), 7.12 (t, *J* = 7.8 Hz, 1H), 7.24-7.32 (m, 4H), 7.36 (d, *J* = 7.2 Hz, 1H), 7.67 (d, *J* = 7.8 Hz, 2H); <sup>13</sup>C NMR (151 MHz, CDCl<sub>3</sub>): δ = 16.3, 26.6, 37.8, 51.8, 65.0, 65.0, 108.2, 118.9 (2C), 122.6, 125.0, 125.2, 125.7, 128.6 (2C), 129.6, 136.6, 137.4, 143.6, 145.1, 159.5, 162.5, 171.7, 174.0; HRMS calcd. for C<sub>24</sub>H<sub>22</sub>N<sub>3</sub>O<sub>4</sub> [M + H]<sup>+</sup>: 416.1605, found: 416.1605.

### Methyl 5-chloro-1,3''-dimethyl-2,5''-dioxo-1''-phenyl-1'',5''-dihydrodispiro [indoline-3,2'-cyclopentane-1',4''-pyrazol]-3'-ene-3'-carboxylate

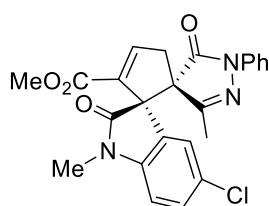

Cycloaddition product **3b** was prepared as described in section 4 and isolated by FC on silica (eluting with PE/EA from 10:1 to 2:1) in 80% yield (35.9 mg, >20:1 dr). White solid, melting point: 197-198 °C. <sup>1</sup>H NMR (600 MHz, CDCl<sub>3</sub>): δ = 2.21 (s, 3H), 3.02 (dd, *J* = 3.0, 18.0 Hz, 1H), 3.14 (dd, *J* = 2.4, 18.0 Hz, 1H), 3.19 (s, 3H),



3.62 (s, 3H), 6.70 (d,  $J = 8.4$  Hz, 1H), 7.14 (t,  $J = 7.2$  Hz, 1H), 7.22 (dd,  $J = 1.8, 7.8$  Hz, 1H), 7.31-7.34 (m, 3H), 7.38 (d,  $J = 1.8$  Hz, 1H), 7.66 (d,  $J = 7.8$  Hz, 2H);  $^{13}\text{C}$  NMR (151 MHz,  $\text{CDCl}_3$ ):  $\delta = 16.3, 26.8, 37.8, 52.0, 64.8, 65.0, 109.1, 119.0$  (2C), 125.3, 126.2, 127.0, 128.1, 128.8 (2C), 129.5, 136.2, 137.2, 142.2, 145.5, 159.2, 162.4, 171.5, 173.7; HRMS calcd. for  $\text{C}_{24}\text{H}_{21}\text{ClN}_3\text{O}_4$   $[\text{M} + \text{H}]^+$ : 450.1215, found: 450.1218.

**Methyl 5-bromo-1,3''-dimethyl-2,5''-dioxo-1''-phenyl-1'',5''-dihydrodispiro [indoline-3,2'-cyclopentane-1',4''-pyrazol]-3'-ene-3'-carboxylate**

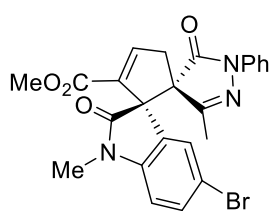

Cycloaddition product **3c** was prepared as described in section 4 and isolated by FC on silica (eluting with PE/EA from 10:1 to 2:1) in 92% yield (45.4 mg, >20:1 dr). White solid, melting point: 196-197 °C.  $^1\text{H}$  NMR (600 MHz,  $\text{CDCl}_3$ ):  $\delta = 2.21$  (s,

3H), 3.01 (dd,  $J = 3.0, 18.0$  Hz, 1H), 3.14 (dd,  $J = 2.4, 18.0$  Hz, 1H), 3.19 (s, 3H), 3.63 (s, 3H), 6.66 (d,  $J = 8.4$  Hz, 1H), 7.14 (t,  $J = 7.8$  Hz, 1H), 7.32-7.35 (m, 3H), 7.37 (dd,  $J = 2.4, 8.4$  Hz, 1H), 7.51 (d,  $J = 2.4$  Hz, 1H), 7.66 (d,  $J = 7.2$  Hz, 2H);  $^{13}\text{C}$  NMR (151 MHz,  $\text{CDCl}_3$ ):  $\delta = 16.3, 26.7, 37.7, 52.0, 64.8, 64.9, 109.6, 115.4, 119.1$  (2C), 125.3, 127.3, 128.8 (2C), 128.9, 132.4, 136.1, 137.1, 142.7, 145.6, 159.2, 162.4, 171.5, 173.6; HRMS calcd. for  $\text{C}_{24}\text{H}_{21}\text{BrN}_3\text{O}_4$   $[\text{M} + \text{H}]^+$ : 494.0710, found: 494.0712.

**Methyl 1,3'',5-trimethyl-2,5''-dioxo-1''-phenyl-1'',5''-dihydrodispiro[indoline-3,2'-cyclopentane-1',4''-pyrazol]-3'-ene-3'-carboxylate**

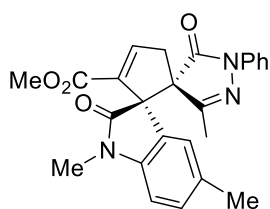

Cycloaddition product **3d** was prepared as described in section 4 and isolated by FC on silica (eluting with PE/EA from 10:1 to 2:1) in 79% yield (33.9 mg, >20:1 dr). White solid, melting point: 194-195 °C.  $^1\text{H}$  NMR (600 MHz,  $\text{CDCl}_3$ ):  $\delta = 2.18$  (s,

3H), 2.20 (s, 3H), 2.96 (dd,  $J = 3.0, 18.0$  Hz, 1H), 3.17 (dd,  $J = 3.0, 18.6$  Hz, 1H), 3.19 (s, 3H), 3.59 (s, 3H), 6.66 (d,  $J = 7.8$  Hz, 1H), 7.02 (d,  $J = 7.8$  Hz, 1H), 7.12 (t,  $J = 7.2$  Hz, 1H), 7.18 (s, 1H), 7.29-7.32 (m, 3H), 7.65 (d,  $J = 7.8$  Hz, 2H);  $^{13}\text{C}$  NMR

(151 MHz, CDCl<sub>3</sub>):  $\delta$  = 16.1, 21.0, 26.6, 37.4, 51.8, 65.1, 65.2, 107.8, 118.8 (2C), 125.0, 125.0, 126.4, 128.6 (2C), 129.8, 132.0, 136.3, 137.3, 141.3, 145.4, 159.2, 162.6, 172.1, 173.9; HRMS calcd. for C<sub>25</sub>H<sub>24</sub>N<sub>3</sub>O<sub>4</sub> [M + H]<sup>+</sup>: 430.1761, found: 430.1763.

**Methyl 6-chloro-1,3''-dimethyl-2,5''-dioxo-1''-phenyl-1'',5''-dihydrodispiro [indoline-3,2'-cyclopentane-1',4''-pyrazol]-3'-ene-3'-carboxylate**

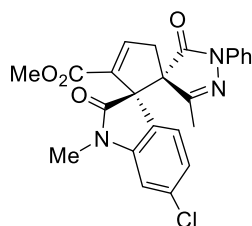

Cycloaddition product **3e** was prepared as described in section 4 and isolated by FC on silica (eluting with PE/EA from 10:1 to 2:1) in 90% yield (40.4 mg, >20:1 dr). White solid, melting point: 169-170 °C. <sup>1</sup>H NMR (600 MHz, CDCl<sub>3</sub>):  $\delta$  = 2.21 (s, 3H), 3.01 (dd, *J* = 2.4, 18.0 Hz, 1H), 3.14 (dd, *J* = 2.4, 18.0 Hz, 1H), 3.20 (s, 3H), 3.61 (s, 3H), 6.80 (d, *J* = 1.2 Hz, 1H), 6.94 (d, *J* = 7.8 Hz, 1H), 7.14 (t, *J* = 7.2 Hz, 1H), 7.28 (d, *J* = 7.8 Hz, 1H), 7.31-7.34 (m, 3H), 7.68 (d, *J* = 7.2 Hz, 2H); <sup>13</sup>C NMR (151 MHz, CDCl<sub>3</sub>):  $\delta$  = 16.3, 26.8, 37.9, 51.9, 64.6, 64.9, 109.1, 118.8 (2C), 122.5, 123.7, 125.2, 126.7, 128.8 (2C), 135.4, 136.4, 137.3, 144.8, 145.2, 159.4, 162.4, 171.5, 174.1; HRMS calcd. for C<sub>24</sub>H<sub>21</sub>ClN<sub>3</sub>O<sub>4</sub> [M + H]<sup>+</sup>: 450.1215, found: 450.1214.

**Methyl 1,3'',7-trimethyl-2,5''-dioxo-1''-phenyl-1'',5''-dihydrodispiro [indoline -3, 2'-cyclopentane-1',4''-pyrazol]-3'-ene-3'-carboxylate**

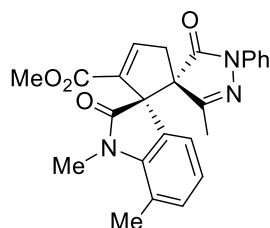

Cycloaddition product **3f** was prepared as described in section 4 and isolated by FC on silica (eluting with PE/EA from 10:1 to 2:1) in 83% yield (35.6 mg, >20:1 dr). White solid, melting point: 195-196 °C. <sup>1</sup>H NMR (600 MHz, CDCl<sub>3</sub>):  $\delta$  = 2.24 (s, 3H), 2.51 (s, 3H), 3.01 (dd, *J* = 2.4, 18.0 Hz, 1H), 3.09 (dd, *J* = 2.4, 18.0 Hz, 1H), 3.47 (s, 3H), 3.61 (s, 3H), 6.86 (t, *J* = 7.8 Hz, 1H), 6.97 (d, *J* = 7.8 Hz, 1H), 7.11 (t, *J* = 7.2 Hz, 1H), 7.19 (d, 7.8 Hz, 1H), 7.28-7.31 (m, 3H), 7.67 (d, *J* = 7.8 Hz, 2H); <sup>13</sup>C NMR (151 MHz, CDCl<sub>3</sub>):  $\delta$  = 16.4, 19.1, 30.0, 37.8, 51.8, 64.7, 65.1, 118.9 (2C), 119.5, 122.2, 123.6, 125.0, 125.7, 128.6 (2C), 133.5, 136.9, 137.4, 141.2, 144.7, 159.8,

162.5, 171.5, 174.7; HRMS calcd. for C<sub>25</sub>H<sub>24</sub>N<sub>3</sub>O<sub>4</sub> [M + H]<sup>+</sup>: 430.1761, found: 430.1762.

**Methyl 1,3'',5,7-tetramethyl-2,5''-dioxo-1''-phenyl-1'',5''-dihydrodispiro [indoline-3,2'-cyclopentane-1',4''-pyrazol]-3'-ene-3'-carboxylate**

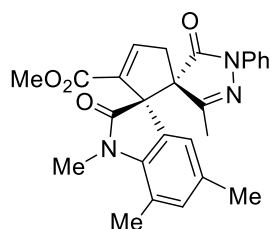

Cycloaddition product **3g** was prepared as described in section 4 and isolated by FC on silica (eluting with PE/EA from 10:1 to 2:1) in 68% yield (30.1 mg, >20:1 dr). White solid, melting point: 203-204 °C. <sup>1</sup>H NMR (600 MHz, CDCl<sub>3</sub>):

δ = 2.14 (s, 3H), 2.21 (s, 3H), 2.46 (s, 3H), 2.96 (dd, *J* = 2.4, 18.0 Hz, 1H), 3.13 (dd, *J* = 2.4, 17.4 Hz, 1H), 3.45 (s, 3H), 3.61 (s, 3H), 6.75 (s, 1H), 7.00 (s, 1H), 7.11 (t, *J* = 7.2 Hz, 1H), 7.29-7.31 (m, 3H), 7.65 (d, *J* = 7.8 Hz, 2H); <sup>13</sup>C NMR (151 MHz, CDCl<sub>3</sub>): δ = 16.2, 18.9, 20.7, 30.0, 37.4, 51.8, 64.9, 65.3, 118.9 (2C), 119.1, 124.2, 125.0, 125.6, 128.6 (2C), 131.6, 134.0, 136.7, 137.4, 138.9, 145.1, 159.5, 162.6, 171.9, 174.7; HRMS calcd. for C<sub>26</sub>H<sub>26</sub>N<sub>3</sub>O<sub>4</sub> [M + H]<sup>+</sup>: 444.1918, found: 444.1921.

**Methyl 1-ethyl-3''-methyl-2,5''-dioxo-1''-phenyl-1'',5''-dihydrodispiro [indoline-3,2'-cyclopentane-1',4''-pyrazol]-3'-ene-3'-carboxylate**

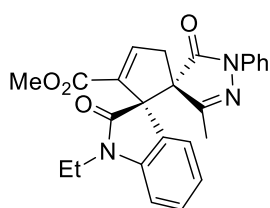

Cycloaddition product **3h** was prepared as described in section 4 and isolated by FC on silica (eluting with PE/EA from 10:1 to 2:1) in 84% yield (36.0 mg, >20:1 dr). White solid, melting point: 191-192 °C. <sup>1</sup>H NMR (600 MHz, CDCl<sub>3</sub>):

δ = 1.20 (t, *J* = 7.2 Hz, 3H), 2.26 (s, 3H), 3.03 (dd, *J* = 2.4, 18.0 Hz, 1H), 3.11 (dd, *J* = 2.4, 18.0 Hz, 1H), 3.57 (s, 3H), 3.74 (q, *J* = 7.2 Hz, 2H), 6.79 (d, *J* = 7.8 Hz, 1H), 6.97 (t, *J* = 7.8 Hz, 1H), 7.11 (t, *J* = 7.2 Hz, 1H), 7.23-7.26 (m, 1H), 7.28-7.32 (m, 3H), 7.35 (d, *J* = 7.8 Hz, 1H), 7.66 (d, *J* = 7.8 Hz, 2H); <sup>13</sup>C NMR (150 MHz, CDCl<sub>3</sub>): δ = 12.1, 16.4, 35.0, 37.7, 51.7, 65.0, 65.1, 108.3, 118.9 (2C), 122.3, 125.0, 125.6, 125.9, 128.6 (2C), 129.5, 136.9, 137.4, 142.6, 144.9, 159.9, 162.4, 171.6, 173.7;

HRMS calcd. for C<sub>25</sub>H<sub>24</sub>N<sub>3</sub>O<sub>4</sub> [M + H]<sup>+</sup>: 430.1761, found: 430.1763.

**Methyl 3''-methyl-2,5''-dioxo-1''-phenyl-1'-propyl-1'',5''-dihydrodispiro [indoline -3, '-cyclopentane-1',4''-pyrazol]-3'-ene-3'-carboxylate**

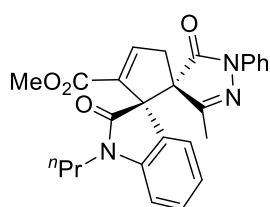

Cycloaddition product **3i** was prepared as described in section 4 and isolated by FC on silica (eluting with PE/EA from 10:1 to 2:1) in 80% yield (35.4 mg, >20:1 dr). White solid, melting point: 162-163 °C. <sup>1</sup>H NMR (600 MHz, CDCl<sub>3</sub>): δ = 0.88 (t, *J* = 7.8 Hz, 3H), 1.65 (t, *J* = 6.6 Hz, 2H), 2.26 (s, 3H), 3.06 (dd, *J* = 2.4, 5.4 Hz, 2H), 3.57 (s, 3H), 3.61-3.68 (m, 2H), 6.78 (d, *J* = 8.4 Hz, 1H), 6.97 (t, *J* = 7.2 Hz, 1H), 7.10 (t, *J* = 7.8 Hz, 1H), 7.24 (t, *J* = 7.8 Hz, 1H), 7.28-7.34 (m, 4H), 7.65 (d, *J* = 7.2 Hz, 2H); <sup>13</sup>C NMR (151 MHz, CDCl<sub>3</sub>): δ = 11.2, 16.5, 20.5, 37.7, 41.9, 51.8, 65.1, 65.2, 108.5, 118.9 (2C), 122.2, 125.0, 125.5, 125.8, 128.6 (2C), 129.5, 137.0, 137.4, 143.0, 144.8, 160.2, 162.4, 171.4, 173.9; HRMS calcd. for C<sub>26</sub>H<sub>26</sub>N<sub>3</sub>O<sub>4</sub> [M + H]<sup>+</sup>: 444.1918, found: 444.1918.

**Methyl 1-benzyl-3''-methyl-2,5''-dioxo-1''-phenyl-1'',5''-dihydrodispiro [indoline -3,2'-cyclopentane-1',4''-pyrazol]-3'-ene-3'-carboxylate**

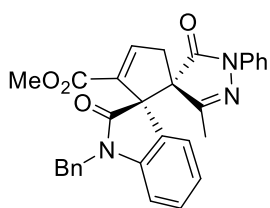

Cycloaddition product **3j** was prepared as described in section 4 and isolated by FC on silica (eluting with PE/EA from 10:1 to 2:1) in 76% yield (37.3 mg, >20:1 dr). White solid, melting point: 57-58 °C. <sup>1</sup>H NMR (600 MHz, CDCl<sub>3</sub>): δ = 2.27 (s, 3H), 3.03 (dd, *J* = 3.0, 18.6 Hz, 1H), 3.14 (dd, *J* = 2.4, 18.0 Hz, 1H), 3.58 (s, 3H), 4.78 (d, *J* = 15.6, 1H), 5.01 (d, *J* = 15.6, 1H), 6.63 (d, *J* = 7.8 Hz, 1H), 6.98 (t, *J* = 7.2 Hz, 1H), 7.04 (t, *J* = 7.8 Hz, 2H), 7.11-7.16 (m, 5H), 7.30-7.34 (m, 4H), 7.68 (d, *J* = 7.8 Hz, 2H); <sup>13</sup>C NMR (151 MHz, CDCl<sub>3</sub>): δ = 16.7, 37.7, 43.9, 51.9, 65.0, 65.6, 109.3, 118.9 (2C), 122.4, 125.0, 125.3, 125.8, 126.8 (2C), 127.4, 128.7 (2C), 128.7 (2C), 129.6, 135.1, 137.1, 137.5, 142.4, 144.7, 160.7, 162.4, 171.0, 174.1; HRMS calcd. for

C<sub>30</sub>H<sub>26</sub>N<sub>3</sub>O<sub>4</sub> [M + H]<sup>+</sup>: 492.1918, found: 492.1917.

**Methyl 1-allyl-3''-methyl-2,5''-dioxo-1''-phenyl-1'',5''-dihydrodispiro [indoline-3, 2'-cyclopentane-1',4''-pyrazol]-3'-ene-3'-carboxylate**

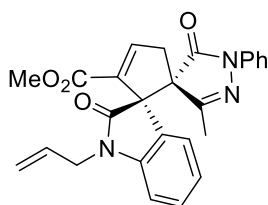

Cycloaddition product **3k** was prepared as described in section 4 and isolated by FC on silica (eluting with PE/EA from 10:1 to 2:1) in 78% yield (34.4 mg, >20:1 dr). White solid, melting point: 154-155 °C. <sup>1</sup>H NMR (600 MHz, CDCl<sub>3</sub>): δ = 2.24 (s, 3H), 3.04 (dd, *J* = 2.4, 18.0 Hz, 1H), 3.12 (dd, *J* = 3.0, 18.0 Hz, 1H), 3.59 (s, 3H), 4.26 (dd, *J* = 4.8, 16.2 Hz, 1H), 4.38 (dd, *J* = 4.8, 16.2 Hz, 1H), 5.11 (d, *J* = 10.2 Hz, 1H), 5.18 (d, *J* = 16.8 Hz, 1H), 5.74-5.80 (m, 1H), 6.76 (d, *J* = 7.8 Hz, 1H), 6.97 (t, *J* = 7.8 Hz, 1H), 7.11 (t, *J* = 7.2 Hz, 1H), 7.22 (t, *J* = 7.8 Hz, 1H), 7.28-7.33 (m, 3H), 7.35 (d, *J* = 7.8 Hz, 1H), 7.65 (d, *J* = 7.2 Hz, 2H); <sup>13</sup>C NMR (151 MHz, CDCl<sub>3</sub>): δ = 16.4, 37.7, 42.5, 51.8, 65.1, 65.2, 109.1, 117.5, 118.9 (2C), 122.5, 125.0, 125.3, 125.8, 128.6 (2C), 129.5, 130.5, 136.7, 137.4, 142.7, 145.1, 159.8, 162.4, 171.6, 173.8; HRMS calcd. for C<sub>26</sub>H<sub>24</sub>N<sub>3</sub>O<sub>4</sub> [M + H]<sup>+</sup>: 442.1761, found: 442.1762.

**1-(*Tert*-butyl) 3'-methyl 3''-methyl-2,5''-dioxo-1''-phenyl-1'',5''-dihydrodispiro [indoline-3,2'-cyclopentane-1',4''-pyrazol]-3'-ene-1,3'-dicarboxylate**

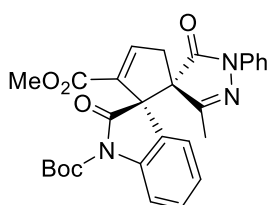

Cycloaddition product **3l** was prepared as described in section 4 and isolated by FC on silica (eluting with PE/EA from 10:1 to 2:1) in 52% yield (26.1 mg, >20:1 dr). White solid, melting point: 54-55 °C. <sup>1</sup>H NMR (600 MHz, CDCl<sub>3</sub>): δ = 1.61 (s, 9H), 2.24 (s, 3H), 2.96 (dd, *J* = 2.4, 18.0 Hz, 1H), 3.15 (dd, *J* = 2.4, 18.0 Hz, 1H), 3.59 (s, 3H), 7.05 (t, *J* = 7.8 Hz, 1H), 7.12 (t, *J* = 7.8 Hz, 1H), 7.25-7.31 (m, 3H), 7.36 (t, *J* = 2.4 Hz, 1H), 7.39 (d, *J* = 6.6 Hz, 1H), 7.60 (d, *J* = 7.2 Hz, 2H), 7.78 (d, *J* = 8.4 Hz, 1H); <sup>13</sup>C NMR (151 MHz, CDCl<sub>3</sub>): δ = 16.0, 28.0 (3C), 37.4, 51.9, 65.7, 66.0, 84.8, 114.8, 119.1 (2C), 124.0, 124.3, 125.3, 125.5, 128.7 (2C), 129.8, 135.8, 137.1, 139.7,

146.2, 148.6, 158.4, 162.4, 171.6, 172.8; HRMS calcd. for  $C_{28}H_{27}N_3NaO_6$   $[M + Na]^+$ : 524.1792, found: 524.1793.

**Methyl 1''-(*tert*-butyl)-1,3''-dimethyl-2,5''-dioxo-1'',5''-dihydrodispiro[indoline-3,2'-cyclopentane-1',4''-pyrazol]-3'-ene-3'-carboxylate**

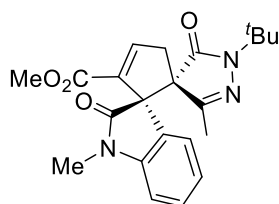

Cycloaddition product **3m** was prepared as described in section 4 and isolated by FC on silica (eluting with PE/EA from 10:1 to 2:1) in 71% yield (28.0 mg, >20:1 dr). White solid, melting point: 114-115 °C.  $^1H$  NMR (600 MHz,  $CDCl_3$ ):

$\delta$  = 1.26 (s, 9H), 2.02 (s, 3H), 2.78 (dd,  $J$  = 3.0, 18.0 Hz, 1H), 3.10 (dd,  $J$  = 1.8, 17.4 Hz, 1H), 3.21 (s, 3H), 3.55 (s, 3H), 6.79 (d,  $J$  = 7.8 Hz, 1H), 6.98 (t,  $J$  = 8.4 Hz, 1H), 7.26-7.29 (m, 2H), 7.37 (d,  $J$  = 7.8 Hz, 1H);  $^{13}C$  NMR (151 MHz,  $CDCl_3$ ):  $\delta$  = 15.9, 26.4, 27.8 (3C), 37.1, 51.6, 57.0, 64.6, 64.9, 107.9, 122.4, 125.6, 126.1, 129.2, 135.9, 143.8, 146.0, 156.0, 162.7, 173.8, 174.4; HRMS calcd. for  $C_{22}H_{26}N_3O_4$   $[M + H]^+$ : 396.1918, found: 396.1918.

**Methyl 1''-(2-chlorophenyl)-1,3''-dimethyl-2,5''-dioxo-1'',5''-dihydrodispiro[indoline-3,2'-cyclopentane-1',4''-pyrazol]-3'-ene-3'-carboxylate**

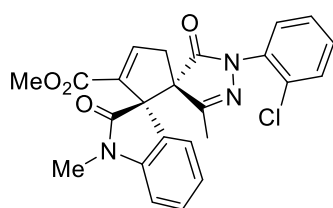

Cycloaddition product **3n** was prepared as described in section 4 and isolated by FC on silica (eluting with PE/EA from 8:1 to 1:1) in 72% yield (32.3 mg, >20:1 dr). White solid, melting point: 182-183 °C.  $^1H$  NMR (600 MHz,

$CDCl_3$ ):  $\delta$  = 2.25 (s, 3H), 3.08 (dd,  $J$  = 3.0, 18.6 Hz, 1H), 3.15 (dd,  $J$  = 2.4, 18.0 Hz, 1H), 3.24 (s, 3H), 3.60 (s, 3H), 6.82 (d,  $J$  = 7.8 Hz, 1H), 7.01 (t,  $J$  = 7.2 Hz, 1H), 7.10-7.12 (m, 1H), 7.23-7.24 (m, 2H), 7.28-7.32 (m, 3H), 7.36-7.38 (m, 1H);  $^{13}C$  NMR (151 MHz,  $CDCl_3$ ):  $\delta$  = 16.5, 26.6, 37.5, 51.9, 63.6, 65.3, 108.1, 122.4, 125.4, 126.1, 127.3, 128.4, 129.6, 129.7, 130.2, 131.6, 134.1, 137.0, 143.5, 144.6, 160.6, 162.4, 171.8, 173.9; HRMS calcd. for  $C_{24}H_{21}ClN_3O_4$   $[M + H]^+$ : 450.1215, found:

450.1218.

**Ethyl 1,3''-dimethyl-2,5''-dioxo-1''-phenyl-1'',5''-dihydrodispiro[indoline-3,2'-cyclopentane-1',4''-pyrazol]-3'-ene-3'-carboxylate**

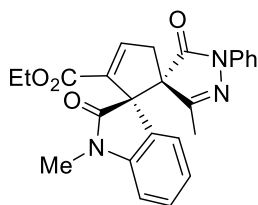

Cycloaddition product **3o** was prepared as described in section 4 and isolated by FC on silica (eluting with PE/EA from 10:1 to 2:1) in 86% yield (36.9 mg, >20:1 dr). White solid, melting point: 143-144 °C. <sup>1</sup>H NMR (600 MHz, CDCl<sub>3</sub>): δ = 1.03 (t, *J* = 6.6 Hz, 3H), 2.23 (s, 3H), 3.01 (dd, *J* = 2.4, 18.0 Hz, 1H), 3.14 (dd, *J* = 2.4, 18.0 Hz, 1H), 3.20 (s, 3H), 3.94-4.01 (m, 2H), 6.77 (d, *J* = 7.8 Hz, 1H), 6.97 (t, *J* = 7.2 Hz, 1H), 7.11 (t, *J* = 7.2 Hz, 1H), 7.23-7.29 (m, 1H), 7.30 (t, *J* = 7.8 Hz, 2H), 7.33 (t, *J* = 2.4 Hz, 1H), 7.36 (d, *J* = 7.8 Hz, 1H), 7.67 (d, *J* = 7.8 Hz, 2H); <sup>13</sup>C NMR (151 MHz, CDCl<sub>3</sub>): δ = 13.8, 16.3, 26.6, 37.8, 60.6, 65.0, 65.1, 108.1, 118.9 (2C), 122.6, 125.0, 125.5, 125.8, 128.6 (2C), 129.5, 137.0, 137.4, 143.6, 144.9, 159.6, 162.0, 171.8, 174.2; HRMS calcd. for C<sub>25</sub>H<sub>24</sub>N<sub>3</sub>O<sub>4</sub> [M + H]<sup>+</sup>: 430.1761, found: 430.1761.

**Ethyl 5-bromo-1,3''-dimethyl-2,5''-dioxo-1''-phenyl-1'',5''-dihydrodispiro [indoline-3,2'-cyclopentane-1',4''-pyrazol]-3'-ene-3'-carboxylate**

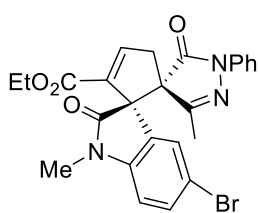

Cycloaddition product **3p** was prepared as described in section 4 and isolated by FC on silica (eluting with PE/EA from 10:1 to 2:1) in 84% yield (42.7 mg, >20:1 dr). White solid, melting point: 182-183 °C. <sup>1</sup>H NMR (600 MHz, CDCl<sub>3</sub>): δ = 1.08 (t, *J* = 7.2 Hz, 3H), 2.21 (s, 3H), 3.00 (dd, *J* = 3.0, 18.0 Hz, 1H), 3.12 (dd, *J* = 2.4, 18.0 Hz, 1H), 3.16 (s, 3H), 3.98-4.05 (m, 2H), 6.62 (d, *J* = 8.4 Hz, 1H), 7.14 (t, *J* = 7.2 Hz, 1H), 7.31-7.36 (m, 4H), 7.51 (d, *J* = 1.8 Hz, 1H), 7.66 (d, *J* = 7.8 Hz, 2H); <sup>13</sup>C NMR (151 MHz, CDCl<sub>3</sub>): δ = 13.8, 16.2, 26.6, 37.6, 60.8, 64.9 (2C), 109.5, 115.3, 119.0 (2C), 125.2, 127.5, 128.7 (2C), 128.9, 132.3, 136.4, 137.1, 142.7, 145.5, 159.2, 161.8, 171.5, 173.6; HRMS calcd. for C<sub>25</sub>H<sub>23</sub>BrN<sub>3</sub>O<sub>4</sub> [M + H]<sup>+</sup>: 508.0866, found: 508.0871.

**Ethyl 6-chloro-1,3''-dimethyl-2,5''-dioxo-1''-phenyl-1'',5''-dihydrodispiro [indoline-3,2'-cyclopentane-1',4''-pyrazol]-3'-ene-3'-carboxylate**

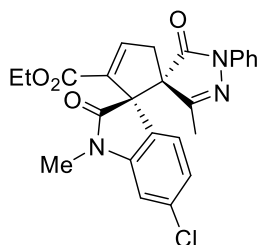

Cycloaddition product **3q** was prepared as described in section 4 and isolated by FC on silica (eluting with PE/EA from 10:1 to 2:1) in 95% yield (44.0 mg, >20:1 dr). White solid, melting point: 176-177 °C. <sup>1</sup>H NMR (600 MHz, CDCl<sub>3</sub>): δ = 1.08 (t, *J* = 7.2 Hz, 3H), 2.22 (s, 3H), 3.00 (dd, *J* = 3.0, 18.0 Hz, 1H), 3.13 (dd, *J* = 2.4, 18.0 Hz, 1H), 3.18 (s, 3H), 3.98-4.04 (m, 2H), 6.78 (d, *J* = 1.8 Hz, 1H), 6.94 (dd, *J* = 2.4, 8.4 Hz, 1H), 7.13 (t, *J* = 7.2 Hz, 1H), 7.28-7.33 (m, 4H), 7.68 (d, *J* = 7.8 Hz, 2H); <sup>13</sup>C NMR (150 MHz, CDCl<sub>3</sub>): δ = 13.8, 16.3, 26.7, 37.8, 60.8, 64.5, 64.9, 109.0, 118.8 (2C), 122.5, 123.9, 125.2, 126.7, 128.7 (2C), 135.3, 136.7, 137.3, 144.8, 145.0, 159.4, 161.9, 171.5, 174.1; HRMS calcd. for C<sub>25</sub>H<sub>23</sub>ClN<sub>3</sub>O<sub>4</sub> [M + H]<sup>+</sup>: 464.1372, found: 464.1372.

**Methyl (*E*)-3-(1,1''-dimethyl-2,2''-dioxodispiro[indoline-3,1'-cyclopropane-2',3''-indolin] -3'-yl) acrylate**

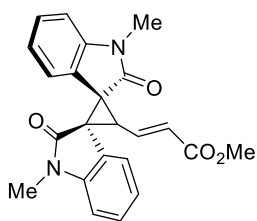

Cycloaddition product **5a** was prepared as described in section 5 and isolated by FC on silica (eluting with PE/CH<sub>2</sub>Cl<sub>2</sub> from 5:1 to 1:4) in 93% yield (36.1 mg). White solid, melting point: 231-232 °C. <sup>1</sup>H NMR (600 MHz, CDCl<sub>3</sub>): δ = 3.17 (s, 3H), 3.19 (s, 3H), 3.73 (d, *J* = 9.0 Hz, 1H), 3.74 (s, 3H), 6.15 (d, *J* = 15.6 Hz, 1H), 6.81 (d, *J* = 7.8 Hz, 1H), 6.85 (d, *J* = 7.8 Hz, 1H), 7.09-7.14 (m, 2H), 7.28-7.34 (m, 2H), 8.07-8.11 (m, 2H), 8.21 (d, *J* = 7.8 Hz, 1H); <sup>13</sup>C NMR (151 MHz, CDCl<sub>3</sub>): δ = 26.4, 26.8, 40.0, 46.0, 47.5, 51.7, 107.6, 107.9, 121.9, 122.1, 122.1, 124.1, 125.7, 125.8, 127.8, 128.4, 128.5, 137.9, 143.7, 144.1, 165.8, 170.4, 171.3; HRMS calcd. for C<sub>23</sub>H<sub>21</sub>N<sub>2</sub>O<sub>4</sub> [M + H]<sup>+</sup>: 389.1496, found: 389.1496.



**Methyl (*E*)-3-(1,1''-diethyl-2,2''-dioxodispiro[indoline-3,1'-cyclopropane-2',3''-indolin]-3'-yl)acrylate**

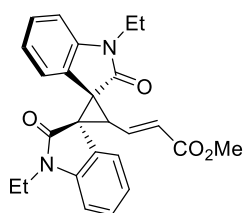

Cycloaddition product **5b** was prepared as described in section 5 and isolated by FC on silica (eluting with PE/CH<sub>2</sub>Cl<sub>2</sub> from 2:1 to 1:4) in 91% yield (37.9 mg). White solid, melting point: 232-233 °C. <sup>1</sup>H NMR (600 MHz, CDCl<sub>3</sub>): δ = 1.21-1.24 (m, 6H), 3.70-3.79 (m, 8H), 6.15 (d, *J* = 15.6 Hz, 1H), 6.84 (d, *J* = 7.8 Hz, 1H), 6.87 (d, *J* = 7.8 Hz, 1H), 7.07-7.12 (m, 2H), 7.27-7.32 (m, 2H), 8.08-8.12 (m, 2H), 8.23 (d, *J* = 7.8 Hz, 1H); <sup>13</sup>C NMR (151 MHz, CDCl<sub>3</sub>): = 12.5, 12.6, 35.0, 35.4, 40.2, 46.0, 47.4, 51.7, 107.7, 108.0, 121.7, 121.9, 122.4, 124.3, 125.7, 126.1, 128.0, 128.3, 128.3, 138.1, 142.8, 143.1, 165.8, 170.0, 171.0; HRMS calcd. for C<sub>25</sub>H<sub>25</sub>N<sub>2</sub>O<sub>4</sub> [M + H]<sup>+</sup>: 417.1809, found: 417.1809.

**Methyl (*E*)-3-(1,1''-diisopropyl-2,2''-dioxodispiro[indoline-3,1'-cyclopropane-2',3''-indolin]-3'-yl)acrylate**

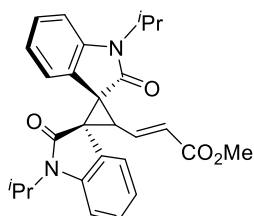

Cycloaddition product **5c** was prepared as described in section 5 and isolated by FC on silica (eluting with PE/CH<sub>2</sub>Cl<sub>2</sub> from 4:1 to 1:2) in 90% yield (40.0 mg). White solid, melting point: 221-222 °C. <sup>1</sup>H NMR (600 MHz, CDCl<sub>3</sub>): δ = 1.42-1.45 (m, 12H), 3.66 (d, *J* = 10.2 Hz, 1H), 3.74 (s, 3H), 4.56-4.64 (m, 2H), 6.15 (d, *J* = 15.6 Hz, 1H), 6.99 (d, *J* = 7.8 Hz, 1H), 7.01 (d, *J* = 7.8 Hz, 1H), 7.04-7.10 (m, 2H), 7.24-7.29 (m, 2H), 8.07-8.12 (m, 2H), 8.24 (d, *J* = 7.8 Hz, 1H); <sup>13</sup>C NMR (151 MHz, CDCl<sub>3</sub>): δ = 19.1, 19.2, 19.4, 19.4, 40.5, 44.0, 44.5, 46.0, 47.5, 51.6, 109.1, 109.3, 121.2, 121.4, 122.6, 124.6, 125.6, 126.1, 127.9, 128.0, 128.0, 138.3, 142.4, 142.7, 165.8, 169.9, 170.9; HRMS calcd. for C<sub>27</sub>H<sub>29</sub>N<sub>2</sub>O<sub>4</sub> [M + H]<sup>+</sup>: 445.2122, found: 445.2122.

**Methyl (*E*)-3-(2,2''-dioxo-1,1''-dipropyldispiro[indoline-3,1'-cyclopropane-2',3''-indolin]-3'-yl)acrylate**

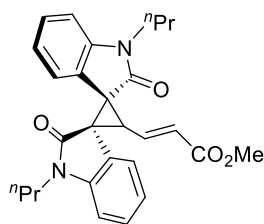

Cycloaddition product **5d** was prepared as described in section 5 and isolated by FC on silica (eluting with PE/CH<sub>2</sub>Cl<sub>2</sub> from 4:1 to 1:2) in 90% yield (40.0 mg). White solid, melting point: 171-172 °C. <sup>1</sup>H NMR (600 MHz, CDCl<sub>3</sub>): δ = 0.87 (q, *J* = 7.2

Hz, 6H), 1.58-1.69 (m, 4H), 3.59-3.68 (m, 4H), 3.73 (s, 3H), 3.74 (d, *J* = 10.2 Hz, 1H), 6.16 (d, *J* = 15.6 Hz, 1H), 6.82 (d, *J* = 7.8 Hz, 1H), 6.85 (d, *J* = 7.8 Hz, 1H), 7.05-7.11 (m, 2H), 7.25-7.31 (m, 2H), 8.08-8.13 (m, 2H), 8.21 (d, *J* = 7.8 Hz, 1H); <sup>13</sup>C NMR (151 MHz, CDCl<sub>3</sub>): δ = 11.3 (2C), 20.6, 20.7, 40.0, 41.9, 42.2, 46.0, 47.5, 51.6, 107.8, 108.1, 121.6, 121.8, 122.2, 124.2, 125.7, 125.9, 127.9, 128.2, 128.3, 138.1, 143.1, 143.4, 165.8, 170.2, 171.2; HRMS calcd. for C<sub>27</sub>H<sub>29</sub>N<sub>2</sub>O<sub>4</sub> [M + H]<sup>+</sup>: 445.2122, found: 445.2122.

**Methyl (*E*)-3-(1,1''-dibenzyl-2,2''-dioxodispiro[indoline-3,1'-cyclopropane-2',3''-indolin]-3'-yl)acrylate**

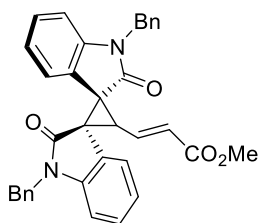

Cycloaddition product **5e** was prepared as described in section 5 and isolated by FC on silica (eluting with PE/CH<sub>2</sub>Cl<sub>2</sub> from 2:1 to 1:4) in 89% yield (48.1 mg). White solid, melting point: 65-66 °C. <sup>1</sup>H NMR (600 MHz, CDCl<sub>3</sub>): δ = 3.76 (s, 3H), 3.88

(d, *J* = 9.6 Hz, 1H), 4.82-4.94 (m, 4H), 6.22 (d, *J* = 15.6 Hz, 1H), 6.73 (d, *J* = 7.8 Hz, 1H), 6.77 (d, *J* = 7.8 Hz, 1H), 7.05-7.13 (m, 6H), 7.17-7.23 (m, 8H), 8.07 (d, *J* = 7.8 Hz, 1H), 8.15 (dd, *J* = 10.2, 15.6 Hz, 1H), 8.21 (d, *J* = 7.8 Hz, 1H); <sup>13</sup>C NMR (151 MHz, CDCl<sub>3</sub>): δ = 39.9, 43.9, 44.3, 46.4, 47.8, 51.7, 108.6, 108.8, 121.9 (2C), 122.1, 123.7, 125.8, 126.0, 127.1 (2C), 127.1 (2C), 127.5, 127.5, 127.7, 128.3, 128.4, 128.7 (2C), 128.7 (2C), 135.4, 135.5, 137.8, 142.8, 143.1, 165.8, 170.3, 171.2; HRMS calcd. for C<sub>35</sub>H<sub>29</sub>N<sub>2</sub>O<sub>4</sub> [M + H]<sup>+</sup>: 541.2122, found: 541.2125.

**Di-*tert*-butyl (*E*)-3'-(3-methoxy-3-oxoprop-1-en-1-yl)-2,2''-dioxodispiro[indoline-3,1'-cyclopropane-2',3''-indoline]-1,1''-dicarboxylate**

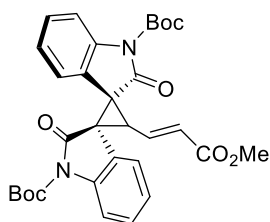

Cycloaddition product **5f** was prepared as described in section 5 and isolated by FC on silica (eluting with PE/CH<sub>2</sub>Cl<sub>2</sub> from 4:1 to 1:3) in 65% yield (36.4 mg). White solid, melting point: 101-102 °C. <sup>1</sup>H NMR (600 MHz, CDCl<sub>3</sub>): δ = 1.58 (s, 18H), 3.75 (s, 3H), 3.79 (d, *J* = 9.6 Hz, 1H), 6.17 (d, *J* = 15.6 Hz, 1H), 7.18-7.23 (m, 2H), 7.31-7.37 (m, 2H), 7.76 (d, *J* = 7.8 Hz, 1H), 7.82 (d, *J* = 8.4 Hz, 1H), 7.90 (d, *J* = 7.8 Hz, 1H), 7.98-8.03 (m, 2H); <sup>13</sup>C NMR (151 MHz, CDCl<sub>3</sub>): δ = 28.0 (3C), 28.0 (3C), 39.4, 47.3, 49.1, 51.7, 84.7, 84.8, 114.1, 114.2, 120.2, 121.9, 123.8, 124.0, 125.4, 126.9, 127.4, 128.8, 128.9, 136.1, 139.8, 140.1, 148.4, 148.5, 165.5, 167.7, 168.6; HRMS calcd. for C<sub>31</sub>H<sub>32</sub>N<sub>2</sub>NaO<sub>8</sub> [M + Na]<sup>+</sup>: 583.2051, found: 583.2051.

**Methyl (*E*)-3-(1,1'-diallyl-2,2'-dioxodispiro[indoline-3,1'-cyclopropane-2',3'-indolin]-3'-yl)acrylate**

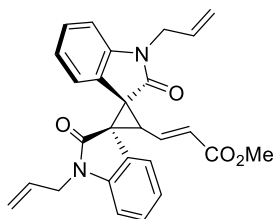

Cycloaddition product **5g** was prepared as described in section 5 and isolated by FC on silica (eluting with PE/CH<sub>2</sub>Cl<sub>2</sub> from 2:1 to 1:4) in 85% yield (37.4 mg). White solid, melting point: 176-177 °C. <sup>1</sup>H NMR (600 MHz, CDCl<sub>3</sub>): δ = 3.74 (s, 3H), 3.75 (d, *J* = 9.6 Hz, 1H), 4.27-4.36 (m, 4H), 5.16-5.19 (m, 4H), 5.74-5.81 (m, 2H), 6.16 (d, *J* = 15.6 Hz, 1H), 6.82 (d, *J* = 7.8 Hz, 1H), 6.85 (d, *J* = 7.8 Hz, 1H), 7.07-7.12 (m, 2H), 7.24-7.30 (m, 2H), 8.07-8.11 (m, 2H), 8.21 (d, *J* = 7.8 Hz, 1H); <sup>13</sup>C NMR (151 MHz, CDCl<sub>3</sub>): δ = 40.2, 42.7, 43.0, 46.0, 47.5, 51.7, 108.5, 108.7, 117.9, 117.9, 121.8, 122.0, 122.1, 124.0, 125.9, 125.9, 127.9, 128.3, 128.3, 131.2, 131.4, 137.8, 142.9, 143.2, 165.7, 170.0, 171.0; HRMS calcd. for C<sub>27</sub>H<sub>25</sub>N<sub>2</sub>O<sub>4</sub> [M + H]<sup>+</sup>: 441.1809, found: 441.1810.

**Methyl (*E*)-3-(6,6'-dichloro-2,2'-dioxo-1,1'-dipropyldispiro[indoline-3,1'-cyclopropane-2',3'-indolin]-3'-yl)acrylate**

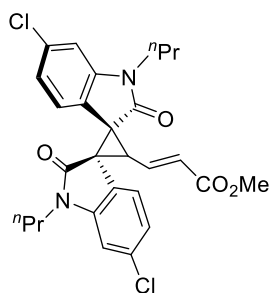

Cycloaddition product **5h** was prepared as described in section 5 and isolated by FC on silica (eluting with PE/CH<sub>2</sub>Cl<sub>2</sub> from 6:1 to 1:1) in 95% yield (48.7 mg). White solid, melting point: 154-155 °C. <sup>1</sup>H NMR (600 MHz, CDCl<sub>3</sub>): δ = 0.88 (q, *J* = 7.2 Hz, 6H), 1.60-1.67 (m, 4H), 3.56-3.65 (m, 4H), 3.69 (d, *J* = 9.6 Hz, 1H), 3.74 (s, 3H), 6.16 (d, *J* = 15.6 Hz, 1H), 6.81 (d, *J* = 1.8 Hz, 1H), 6.84 (d, *J* = 2.4 Hz, 1H), 7.03 (dd, *J* = 1.8, 8.4 Hz, 1H), 7.07 (dd, *J* = 1.8, 8.4 Hz, 1H), 7.95-7.99 (m, 2H), 8.08 (d, *J* = 8.4 Hz, 1H); <sup>13</sup>C NMR (151 MHz, CDCl<sub>3</sub>): δ = 11.3 (2C), 20.6, 20.6, 39.9, 42.1, 42.4, 45.7, 47.2, 51.7, 108.5, 108.8, 120.2, 121.5, 121.8, 122.1, 126.3, 126.9, 128.7, 134.4, 134.6, 137.0, 144.3, 144.6, 165.6, 170.1, 171.1; HRMS calcd. for C<sub>27</sub>H<sub>27</sub>Cl<sub>2</sub>N<sub>2</sub>O<sub>4</sub> [M + H]<sup>+</sup>: 513.1342, found: 513.1343.

**Methyl (*E*)-3-(5,5''-dibromo-2,2''-dioxo-1,1''-dipropyldispiro[indoline-3,1'-cyclopropane-2',3''-indolin]-3'-yl)acrylate**

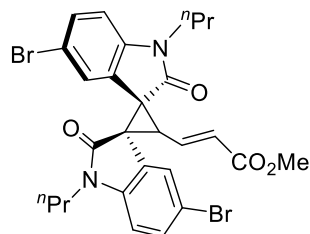

Cycloaddition product **5i** was prepared as described in section 5 and isolated by FC on silica (eluting with PE/CH<sub>2</sub>Cl<sub>2</sub> from 6:1 to 1:1) in 76% yield (45.8 mg). White solid, melting point: 201-202 °C. δ = 0.88 (q, *J* = 7.2 Hz, 6H), 1.58-1.69 (m, 4H), 3.60-3.67 (m, 4H), 3.69 (d, *J* = 10.2 Hz, 1H), 3.76 (s, 3H), 6.17 (d, *J* = 15.6 Hz, 1H), 6.70 (d, *J* = 8.4 Hz, 1H), 6.73 (d, *J* = 7.8 Hz, 1H), 7.40 (dd, *J* = 2.4, 8.4 Hz, 1H), 7.43 (dd, *J* = 2.4, 8.4 Hz, 1H), 7.94 (dd, *J* = 9.6, 15.6 Hz, 1H), 8.24 (d, *J* = 1.8 Hz, 1H), 8.34 (d, *J* = 2.4 Hz, 1H); <sup>13</sup>C NMR (151 MHz, CDCl<sub>3</sub>): δ = 11.2 (2C), 20.5, 20.6, 40.4, 42.0, 42.3, 45.7, 47.1, 51.8, 109.2, 109.4, 114.5, 114.7, 123.8, 125.8, 126.6, 129.1, 130.8, 131.2, 131.4, 136.7, 142.2, 142.6, 165.5, 169.4, 170.5; HRMS calcd. for C<sub>27</sub>H<sub>27</sub>Br<sub>2</sub>N<sub>2</sub>O<sub>4</sub> [M + H]<sup>+</sup>: 601.0332, found: 601.0327.

**Methyl (*E*)-3-(5,5''-dichloro-2,2''-dioxo-1,1''-dipropyldispiro[indoline-3,1'-cyclo**

### propane-2',3''-indolin]-3'-yl)acrylate

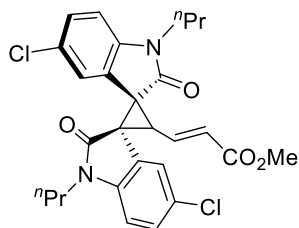

Cycloaddition product **5j** was prepared as described in section 5 and isolated by FC on silica (eluting with PE/CH<sub>2</sub>Cl<sub>2</sub> from 6:1 to 1:1) in 75% yield (38.5 mg). White solid, melting point: 187-188 °C. <sup>1</sup>H NMR (600 MHz, CDCl<sub>3</sub>): δ = 0.88 (q, *J* = 7.2 Hz, 6H), 1.58-1.69 (m, 4H), 3.61-3.68 (m, 4H), 3.69 (d, *J* = 9.6 Hz, 1H), 3.76 (s, 3H), 6.17 (d, *J* = 15.6 Hz, 1H), 6.74 (d, *J* = 8.4 Hz, 1H), 6.78 (d, *J* = 8.4 Hz, 1H), 7.26 (dd, *J* = 2.4, 8.4 Hz, 1H), 7.28 (dd, *J* = 2.4, 8.4 Hz, 1H), 7.96 (dd, *J* = 10.2, 15.6 Hz, 1H), 8.11 (d, *J* = 1.8 Hz, 1H), 8.22 (d, *J* = 2.4 Hz, 1H); <sup>13</sup>C NMR (151 MHz, CDCl<sub>3</sub>): δ = 11.2 (2C), 20.5, 20.6, 40.4, 42.0, 42.3, 45.7, 47.2, 51.7, 108.7, 108.9, 123.4, 125.5, 126.4, 126.6, 127.2, 127.3, 128.1, 128.2, 128.4, 136.8, 141.7, 142.1, 165.5, 169.6, 170.6; HRMS calcd. for C<sub>27</sub>H<sub>27</sub>Cl<sub>2</sub>N<sub>2</sub>O<sub>4</sub> [M + H]<sup>+</sup>: 513.1342, found: 513.1342.

### Ethyl (*E*)-3-(1,1''-dimethyl-2,2''-dioxodispiro[indoline-3,1'-cyclopropane-2',3''-indolin]-3'-yl)acrylate

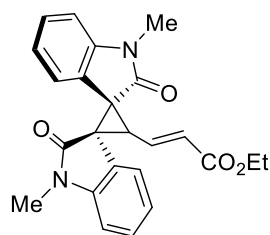

Cycloaddition product **5k** was prepared as described in section 5 and isolated by FC on silica (eluting with PE/CH<sub>2</sub>Cl<sub>2</sub> from 2:1 to 1:6) in 88% yield (35.4 mg). White solid, melting point: 219-220 °C. <sup>1</sup>H NMR (600 MHz, CDCl<sub>3</sub>): δ = 1.27-1.29 (m, 3H), 3.17 (s, 3H), 3.19 (s, 3H), 3.73 (d, *J* = 10.2 Hz, 1H), 4.17-4.22 (m, 2H), 6.14 (d, *J* = 15.6 Hz, 1H), 6.80 (d, *J* = 7.8 Hz, 1H), 6.84 (d, *J* = 7.8 Hz, 1H), 7.08-7.14 (m, 2H), 7.28-7.33 (m, 2H), 8.06-8.10 (m, 2H), 8.21 (d, *J* = 7.8 Hz, 1H); <sup>13</sup>C NMR (151 MHz, CDCl<sub>3</sub>): δ = 14.2, 26.4, 26.8, 40.0, 46.0, 47.5, 60.5, 107.6, 107.9, 121.9, 122.1, 122.1, 124.1, 125.8, 126.2, 127.8, 128.4, 128.4, 137.6, 143.7, 144.1, 165.3, 170.4, 171.4; HRMS calcd. for C<sub>24</sub>H<sub>23</sub>N<sub>2</sub>O<sub>4</sub> [M + H]<sup>+</sup>: 403.1652, found: 403.1653.

**Ethyl (*E*)-3-(1,1''-diethyl-2,2''-dioxodispiro[indoline-3,1'-cyclopropane-2',3''-indolin]-3'-yl)acrylate**

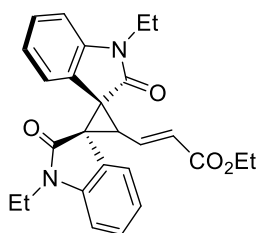

Cycloaddition product **5l** was prepared as described in section 5 and isolated by FC on silica (eluting with PE/CH<sub>2</sub>Cl<sub>2</sub> from 4:1 to 1:4) in 94% yield (40.4 mg). White solid, melting point: 227-228 °C. <sup>1</sup>H NMR (600 MHz, CDCl<sub>3</sub>): δ = 1.20-1.23 (m, 6H), 1.28 (t, *J* = 7.2 Hz, 3H), 3.69-3.81 (m, 5H), 4.16-4.23 (m, 2H), 6.16 (d, *J* = 15.6 Hz, 1H), 6.83 (d, *J* = 7.8 Hz, 1H), 6.87 (d, *J* = 7.8 Hz, 1H), 7.06-7.12 (m, 2H), 7.26-7.32 (m, 2H), 8.07-8.12 (m, 2H), 8.25 (d, *J* = 7.8 Hz, 1H); <sup>13</sup>C NMR (151 MHz, CDCl<sub>3</sub>): δ = 12.5, 12.6, 14.2, 35.0, 35.3, 40.2, 46.0, 47.4, 60.4, 107.7, 107.9, 121.6, 121.8, 122.4, 124.3, 126.0, 126.1, 128.0, 128.2, 128.3, 137.7, 142.8, 143.1, 165.3, 169.9, 171.0; HRMS calcd. for C<sub>26</sub>H<sub>27</sub>N<sub>2</sub>O<sub>4</sub> [M + H]<sup>+</sup>: 431.1965, found: 431.1967.

**Ethyl (*E*)-3-(2,2''-dioxo-1,1''-dipropyldispiro[indoline-3,1'-cyclopropane-2',3''-indolin]-3'-yl)acrylate**

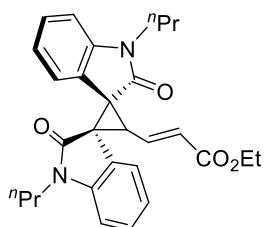

Cycloaddition product **5m** was prepared as described in section 5 and isolated by FC on silica (eluting with PE/CH<sub>2</sub>Cl<sub>2</sub> from 6:1 to 1:2) in 90% yield (41.2 mg). White solid, melting point: 155-156 °C. <sup>1</sup>H NMR (600 MHz, CDCl<sub>3</sub>): δ = 0.87 (q, *J* = 7.8 Hz, 6H), 1.28 (t, *J* = 7.2 Hz, 3H), 1.58-1.69 (m, 4H), 3.58-3.68 (m, 4H), 3.74 (d, *J* = 10.2 Hz, 1H), 4.17-4.22 (m, 2H), 6.16 (d, *J* = 15.6 Hz, 1H), 6.81 (d, *J* = 7.8 Hz, 1H), 6.85 (d, *J* = 7.8 Hz, 1H), 7.05-7.11 (m, 2H), 7.25-7.30 (m, 2H), 8.08-8.12 (m, 2H), 8.22 (d, *J* = 7.8 Hz, 1H); <sup>13</sup>C NMR (151 MHz, CDCl<sub>3</sub>): δ = 11.2, 11.3, 14.2, 20.6, 20.7, 40.0, 41.8, 42.2, 46.0, 47.5, 60.4, 107.8, 108.0, 121.5, 121.8, 122.2, 124.1, 125.9, 126.1, 127.9, 128.2, 128.2, 137.7, 143.1, 143.4, 165.3, 170.2, 171.2; HRMS calcd. for C<sub>28</sub>H<sub>31</sub>N<sub>2</sub>O<sub>4</sub> [M + H]<sup>+</sup>: 459.2278, found: 459.2278.

**Ethyl (*E*)-3-(6''-dichloro-2,2''-dioxo-1,1''-dipropyldispiro[indoline-3,1'-cyclopropane-2',3''-indolin]-3'-yl)acrylate**

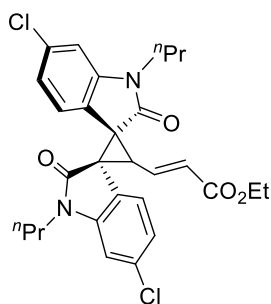

Cycloaddition product **5n** was prepared as described in section 5 and isolated by FC on silica (eluting with PE/CH<sub>2</sub>Cl<sub>2</sub> from 6:1 to 1:2) in 91% yield (48.0 mg). White solid, melting point: 72-73 °C. <sup>1</sup>H NMR (600 MHz, CDCl<sub>3</sub>): δ = 0.88 (q, *J* = 7.2 Hz, 6H), 1.28 (t, *J* = 7.2 Hz, 3H), 1.59-1.68 (m, 4H), 3.55-3.66 (m, 4H), 3.69 (d, *J* = 10.2 Hz, 1H), 4.18-4.23 (m, 2H), 6.16 (d, *J* = 16.2 Hz, 1H), 6.80 (d, *J* = 2.4 Hz, 1H), 6.84 (d, *J* = 1.8 Hz, 1H), 7.03 (dd, *J* = 1.8, 8.4 Hz, 1H), 7.07 (dd, *J* = 1.8, 8.4 Hz, 1H), 7.94-7.98 (m, 2H), 8.09 (d, *J* = 8.4 Hz, 1H); <sup>13</sup>C NMR (151 MHz, CDCl<sub>3</sub>): δ = 11.2, 11.2, 14.2, 20.6, 20.6, 39.9, 42.0, 42.4, 45.7, 47.2, 60.6, 108.5, 108.8, 120.2, 121.5, 121.8, 122.1, 126.8, 126.9, 128.8, 134.4, 134.6, 136.6, 144.3, 144.6, 165.2, 170.1, 171.1; HRMS calcd. for C<sub>28</sub>H<sub>29</sub>Cl<sub>2</sub>N<sub>2</sub>O<sub>4</sub> [M + H]<sup>+</sup>: 527.1499, found: 527.1498.

**Ethyl (*E*)-3-(5,5''-dichloro-2,2''-dioxo-1,1''-dipropyldispiro[indoline-3,1'-cyclopropane-2',3''-indolin]-3'-yl)acrylate**

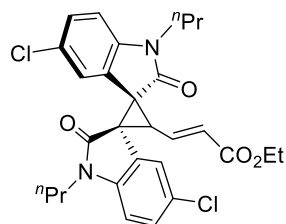

Cycloaddition product **5o** was prepared as described in section 5 and isolated by FC on silica (eluting with PE/CH<sub>2</sub>Cl<sub>2</sub> from 6:1 to 1:2) in 86% yield (45.3 mg). White solid, melting point: 78-79 °C. <sup>1</sup>H NMR (600 MHz, CDCl<sub>3</sub>): δ = 0.88 (q, *J* = 7.2 Hz, 6H), 1.30 (t, *J* = 7.2 Hz, 3H), 1.58-1.69 (m, 4H), 3.61-3.68 (m, 4H), 3.70 (d, *J* = 10.2 Hz, 1H), 4.17-4.26 (m, 2H), 6.17 (d, *J* = 15.6 Hz, 1H), 6.75 (d, *J* = 8.4 Hz, 1H), 6.78 (d, *J* = 8.4 Hz, 1H), 7.24-7.29 (m, 2H), 7.95 (dd, *J* = 9.6, 15.6 Hz, 1H), 8.12 (d, *J* = 2.4 Hz, 1H), 8.23 (d, *J* = 2.4 Hz, 1H); <sup>13</sup>C NMR (151 MHz, CDCl<sub>3</sub>): δ = 11.2, 11.2, 14.2, 20.5, 20.6, 40.3, 42.0, 42.3, 45.7, 47.2, 60.5, 108.6, 108.8, 123.4, 125.4, 126.4, 126.9, 127.1, 127.3, 128.2, 128.2, 128.4, 136.4, 141.7, 142.1, 165.1, 169.5, 170.6; HRMS calcd. for C<sub>28</sub>H<sub>29</sub>Cl<sub>2</sub>N<sub>2</sub>O<sub>4</sub> [M + H]<sup>+</sup>: 527.1499,

found: 527.1497.

**Methyl (*E*)-3-(2,2''-dioxodispiro[indoline-3,1'-cyclopropane-2',3''-indolin]-3'-yl)acrylate**

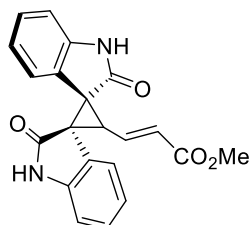

White solid, melting point: 119-120 °C. <sup>1</sup>H NMR (600 MHz, DMSO-*d*<sub>6</sub>): δ = 3.66 (s, 3H), 3.85 (d, *J* = 10.2 Hz, 1H), 6.41 (d, *J* = 15.6 Hz, 1H), 6.84 (d, *J* = 7.8 Hz, 1H), 6.89 (d, *J* = 7.8 Hz, 1H), 6.96 (td, *J* = 1.8, 7.8 Hz, 1H), 6.01 (td, *J* = 1.8, 7.8 Hz, 1H), 7.21 (td, *J* = 1.8, 7.8 Hz, 1H), 7.25 (td, *J* = 1.8, 7.8 Hz, 1H), 7.87 (d, *J* = 7.8 Hz, 1H), 7.92 (d, *J* = 7.8 Hz, 1H), 8.00 (dd, *J* = 10.2, 15.6 Hz, 1H), 10.76 (s, 1H), 10.79 (s, 1H); <sup>13</sup>C NMR (151 MHz, DMSO-*d*<sub>6</sub>): δ = 38.5, 45.9, 47.3, 51.5, 109.3, 109.7, 120.6, 120.8, 122.3, 124.2, 125.3, 125.9, 127.1, 128.3, 128.4, 138.3, 142.1, 142.5, 165.5, 171.7, 171.8; HRMS calcd. for C<sub>21</sub>H<sub>17</sub>N<sub>2</sub>O<sub>4</sub> [M + H]<sup>+</sup>: 361.1183, found: 361.1185.

## 10. References

- [1] S. Wang, J. Izquierdo, C. Rodríguez-Esrich, and M. A. Pericàs, Asymmetric [4 + 2] Annulation Reactions Catalyzed by a Robust, Immobilized Isothiourea, *ACS Catal.*, 2017, **7**, 2780.
- [2] B. M. Trost and M. Osipov, Palladium-Catalyzed Asymmetric Construction of Vicinal All-Carbon Quaternary Stereocenters and its Application to the Synthesis of Cyclotryptamine Alkaloids, *Angew. Chem. Int. Ed.*, 2013, **52**, 9176.



# 11. <sup>1</sup>H and <sup>13</sup>C NMR spectra

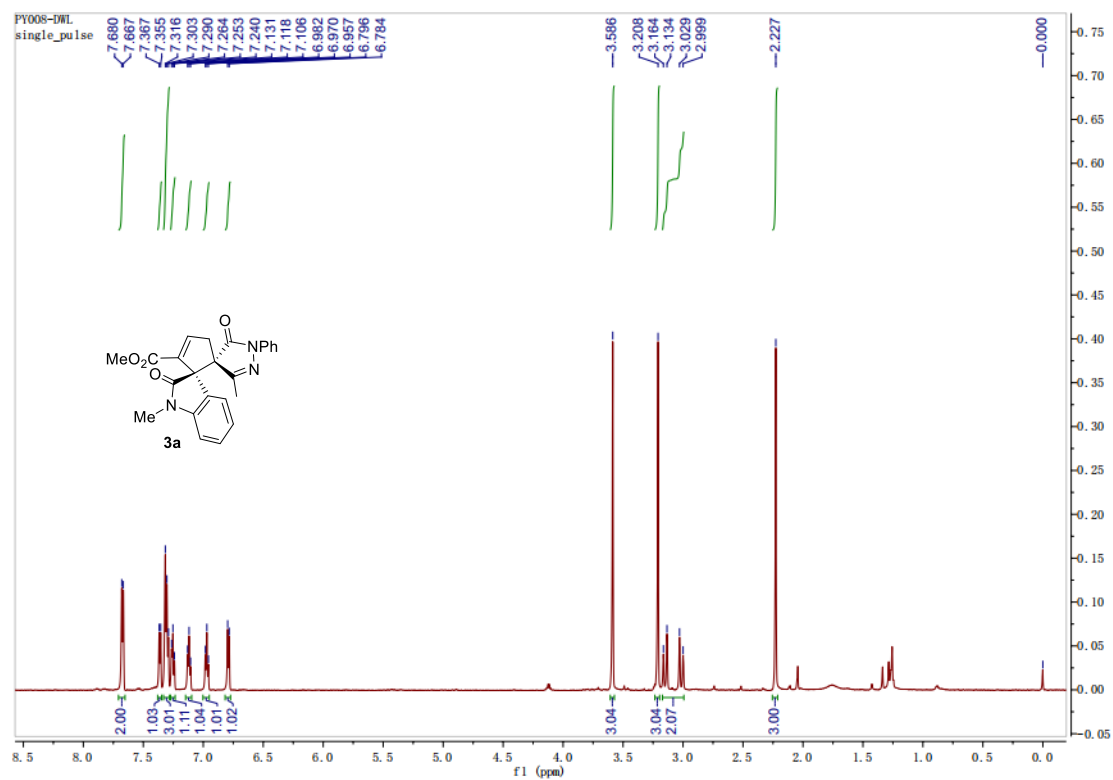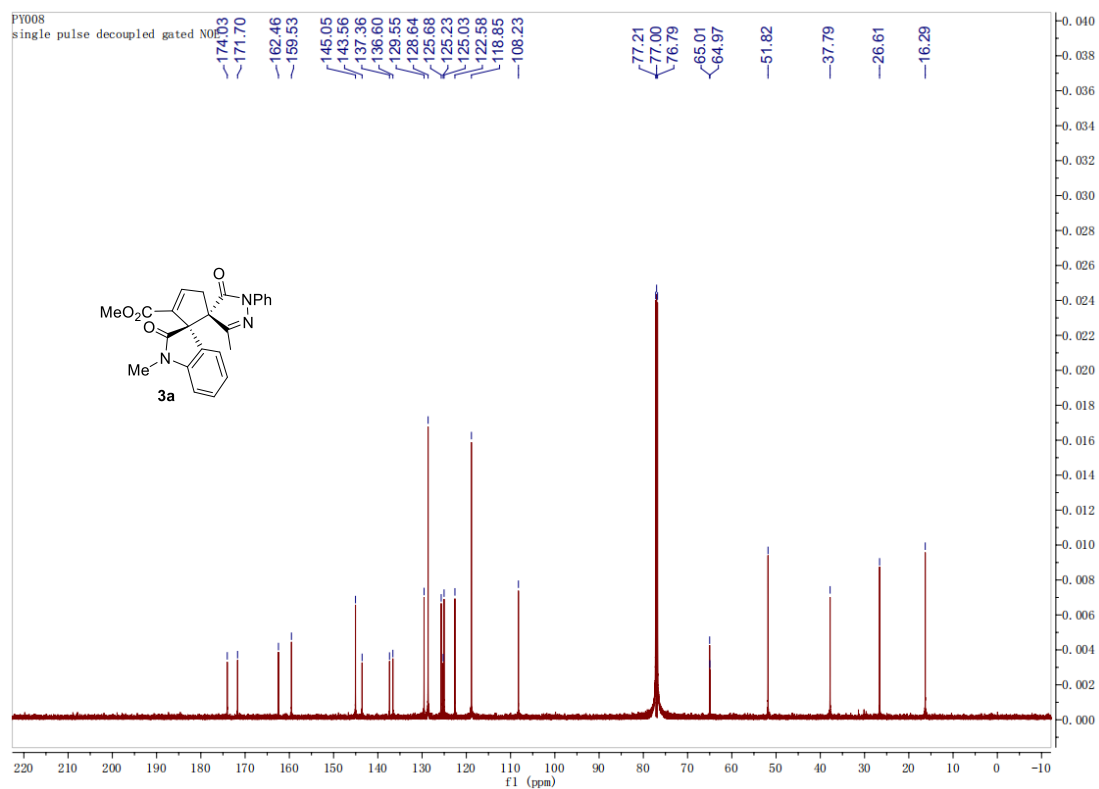

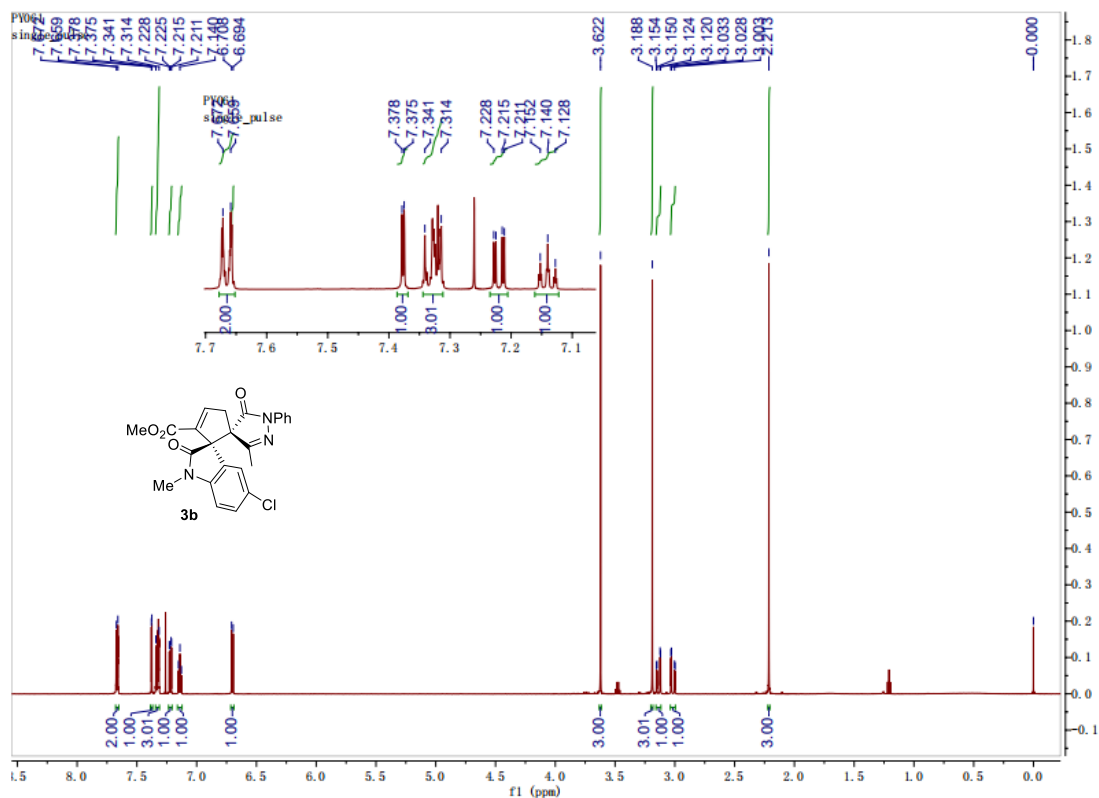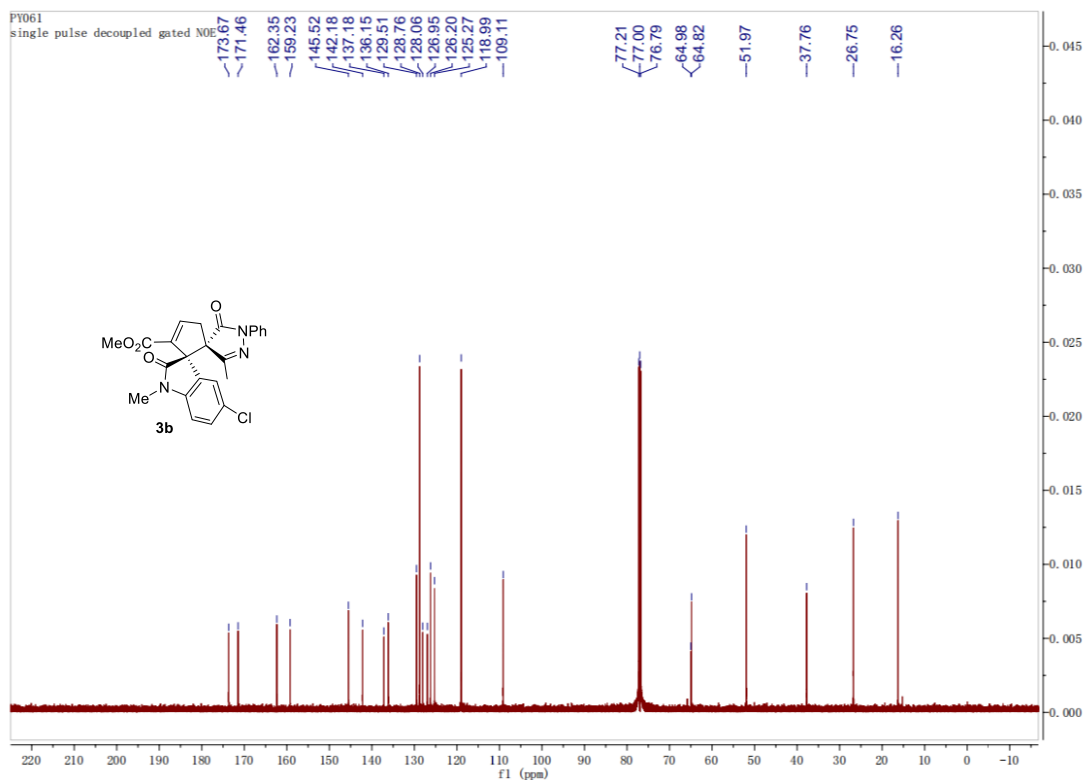

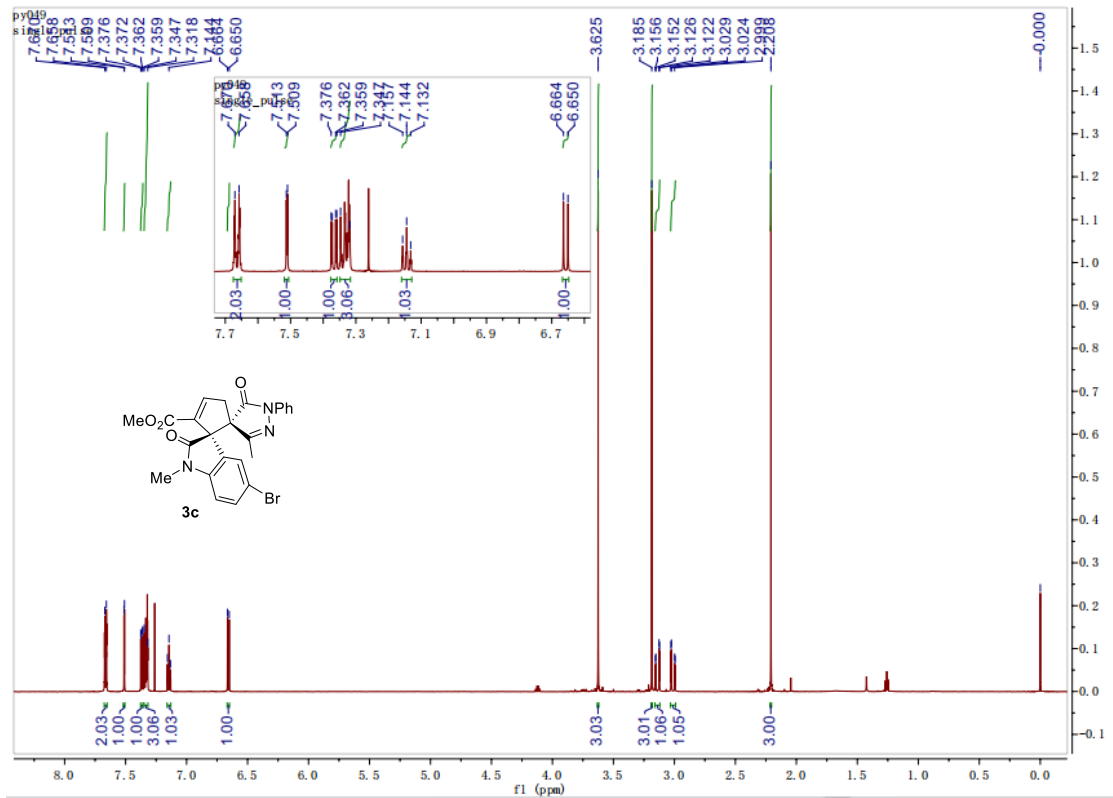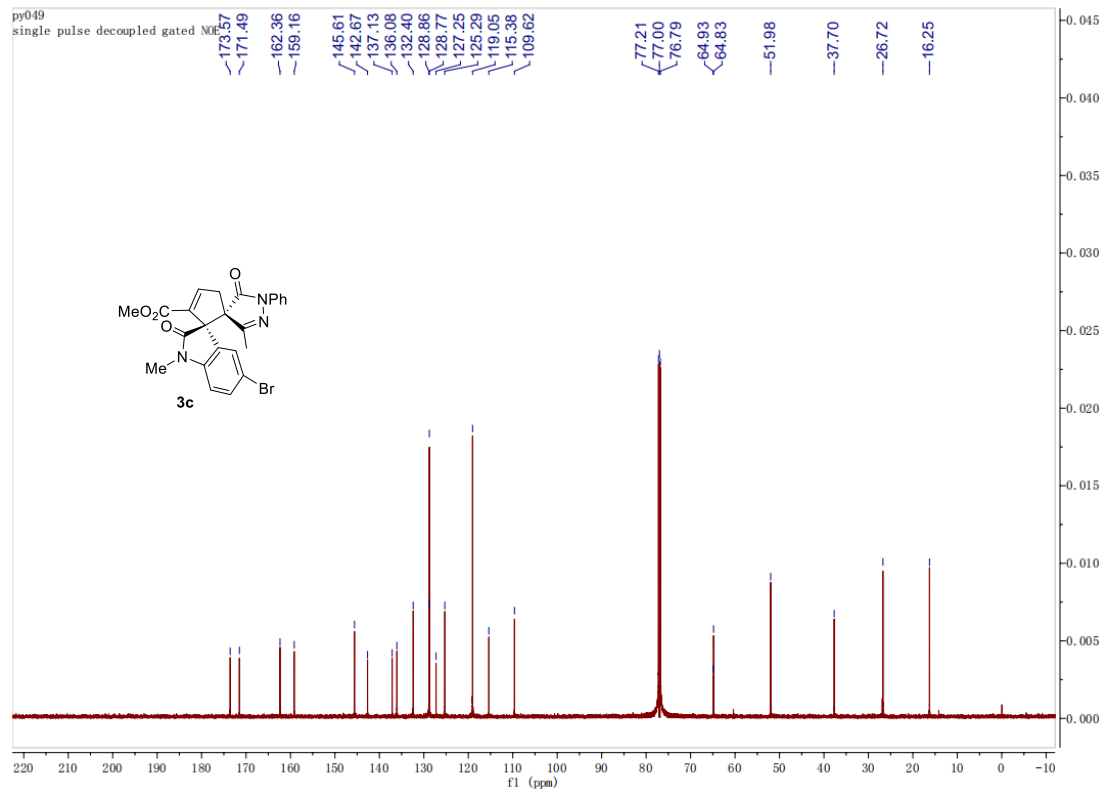

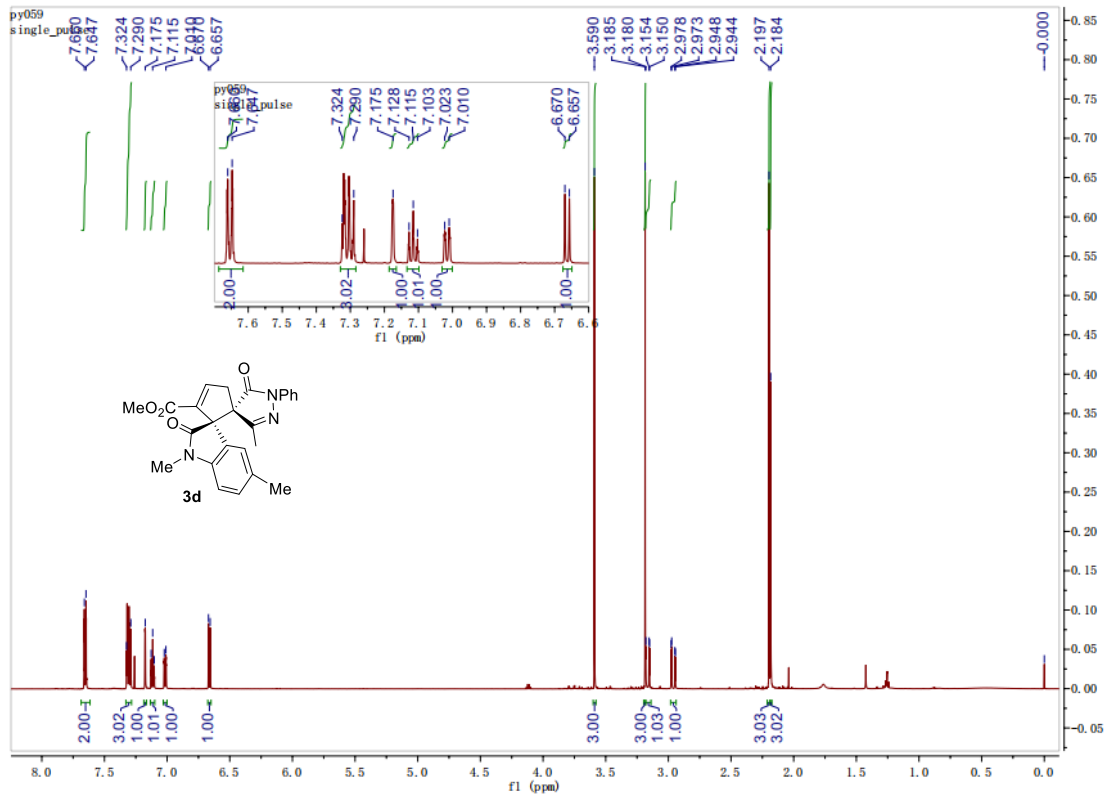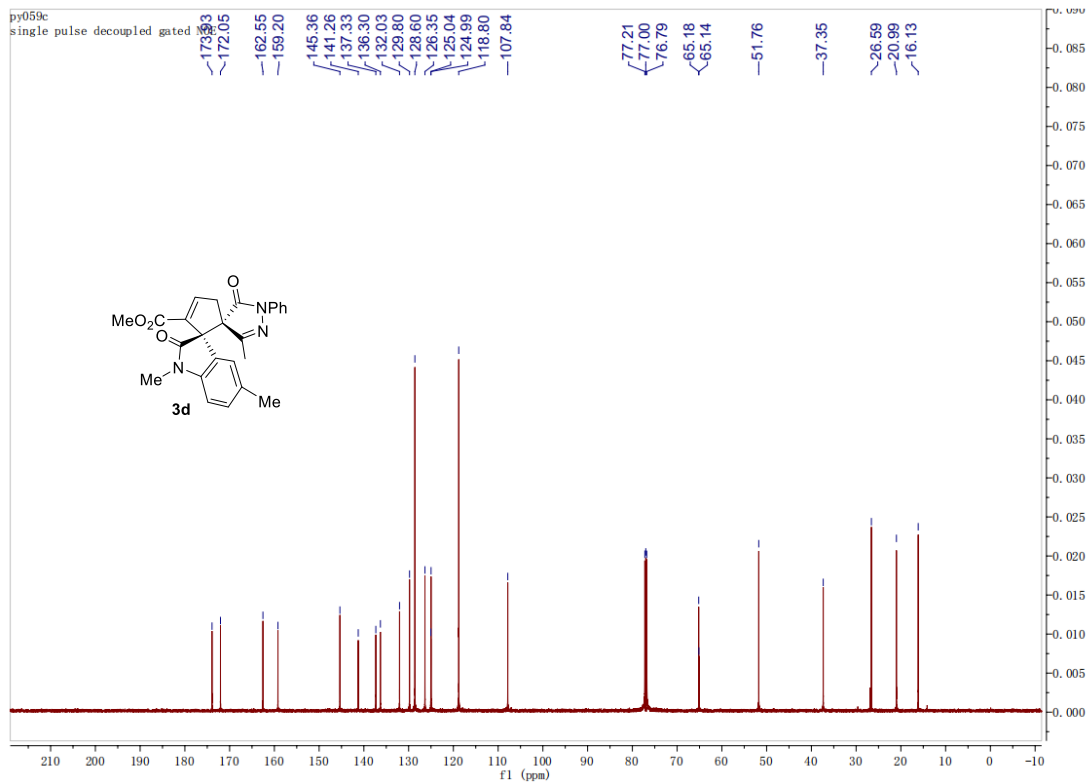

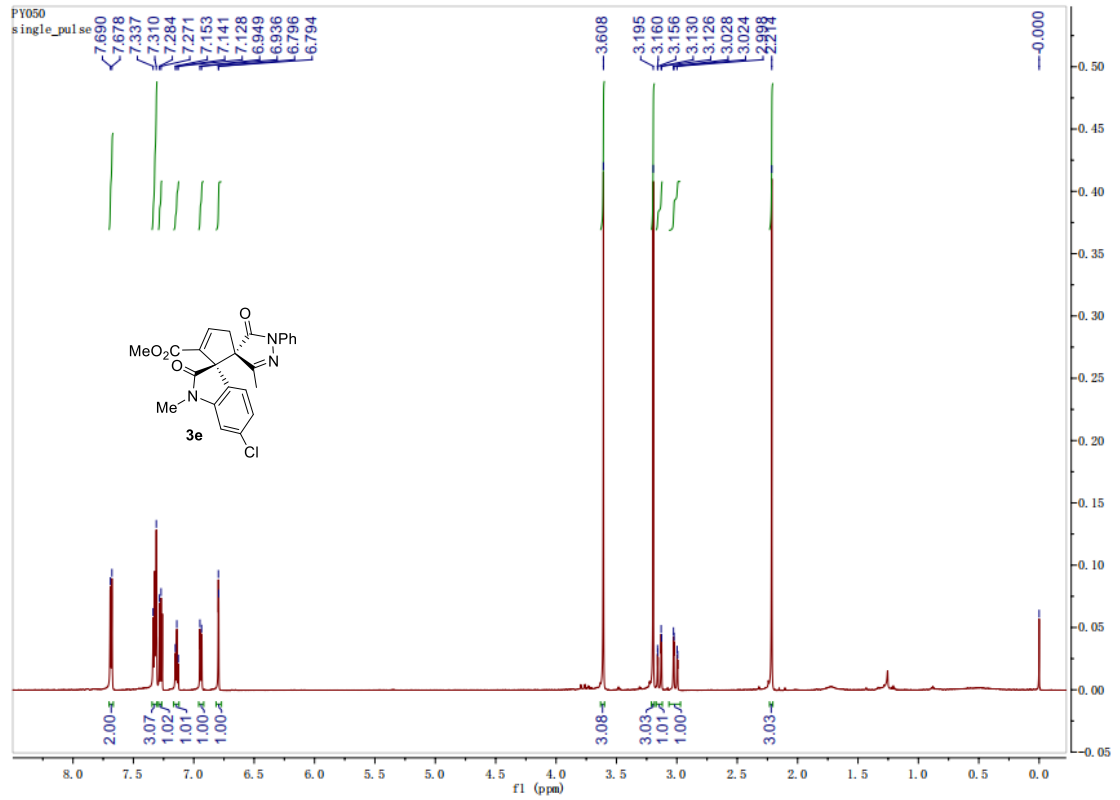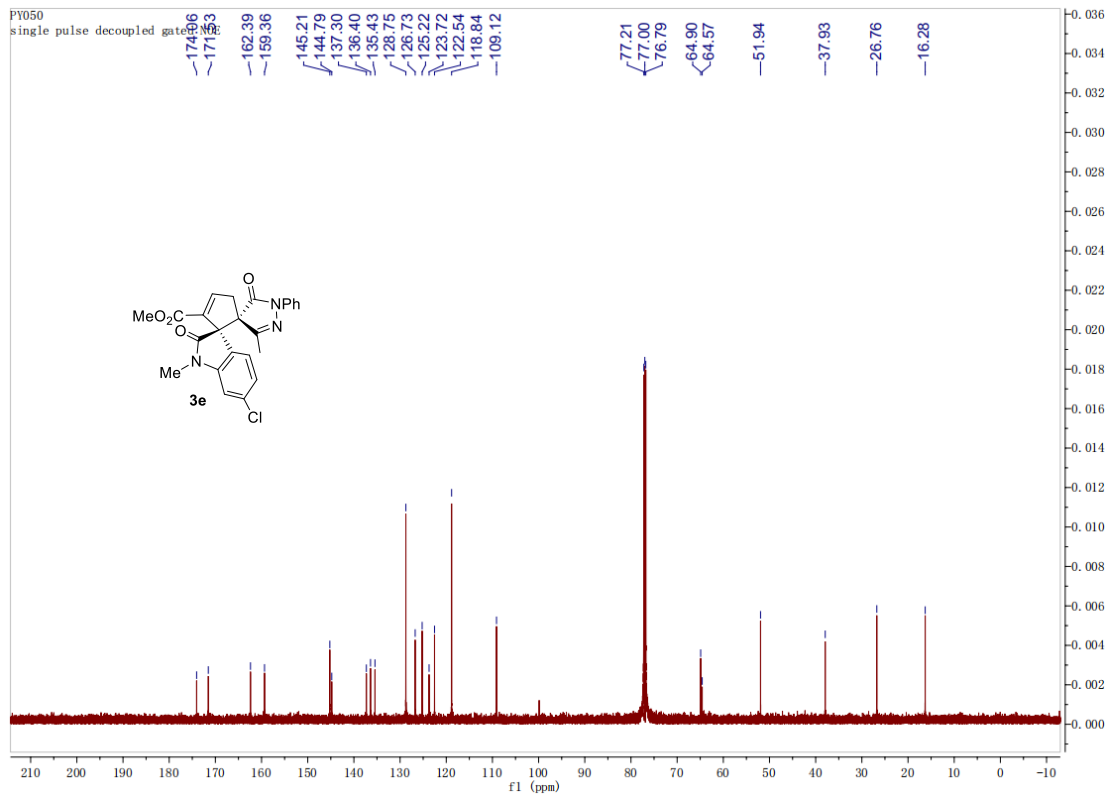

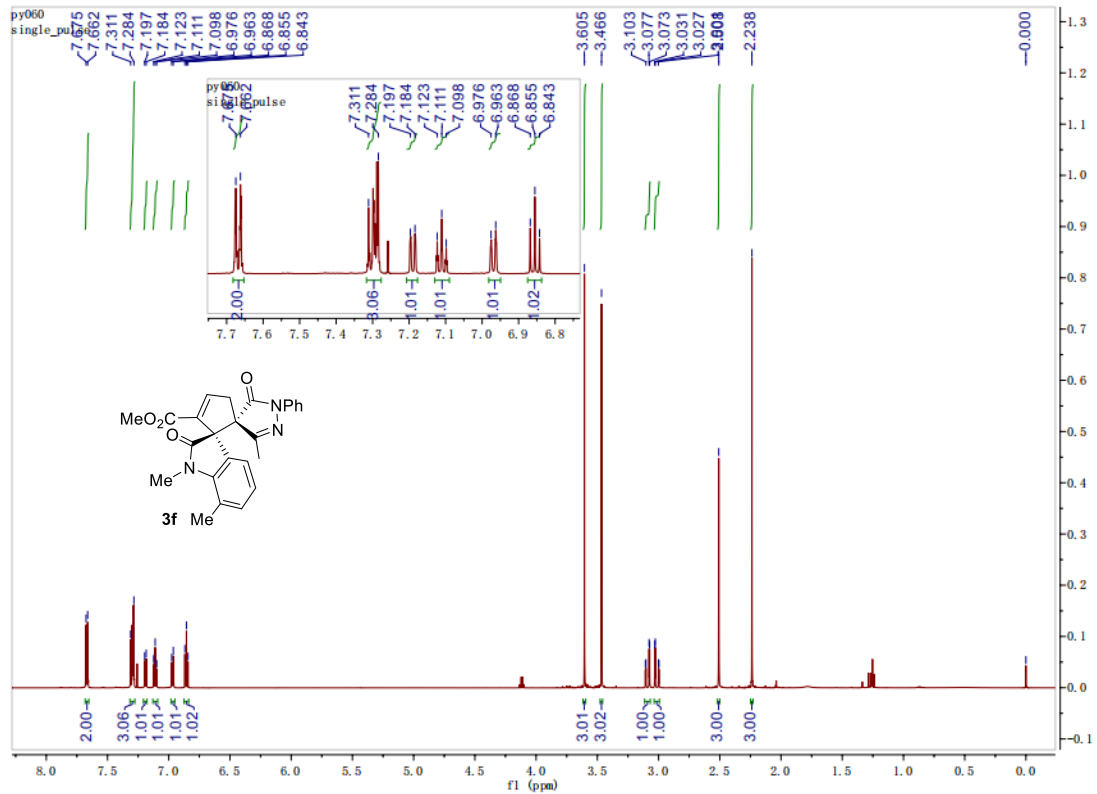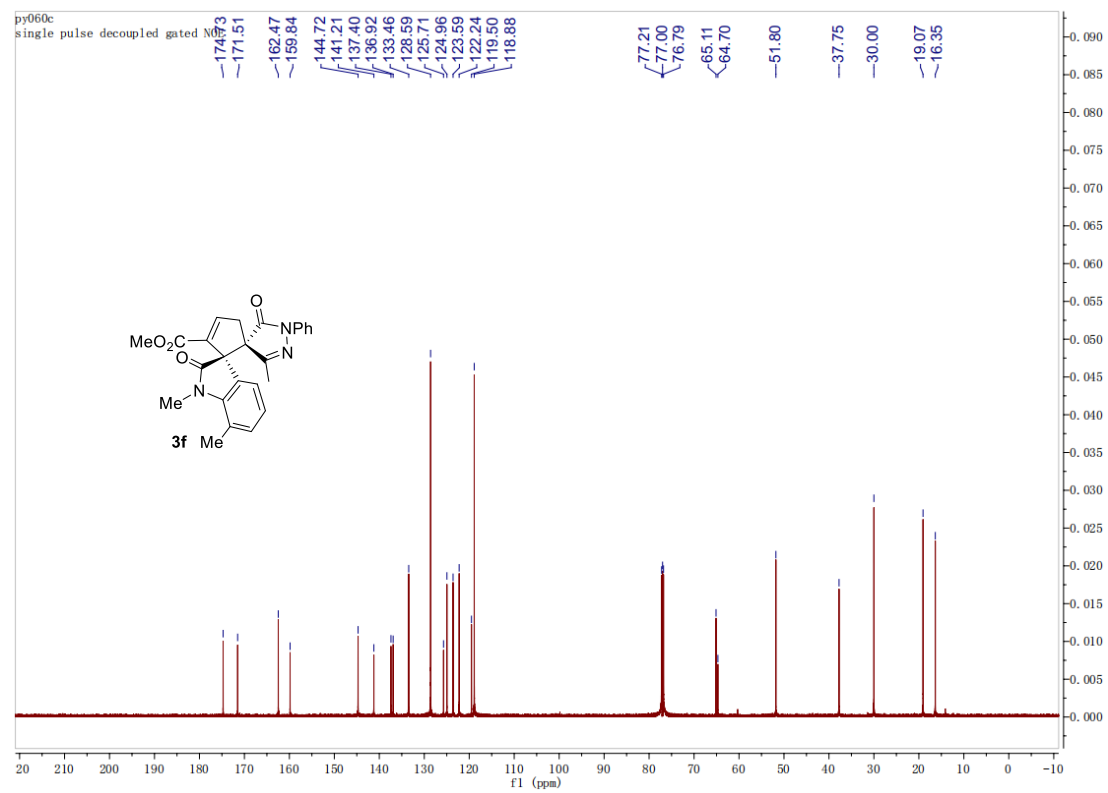

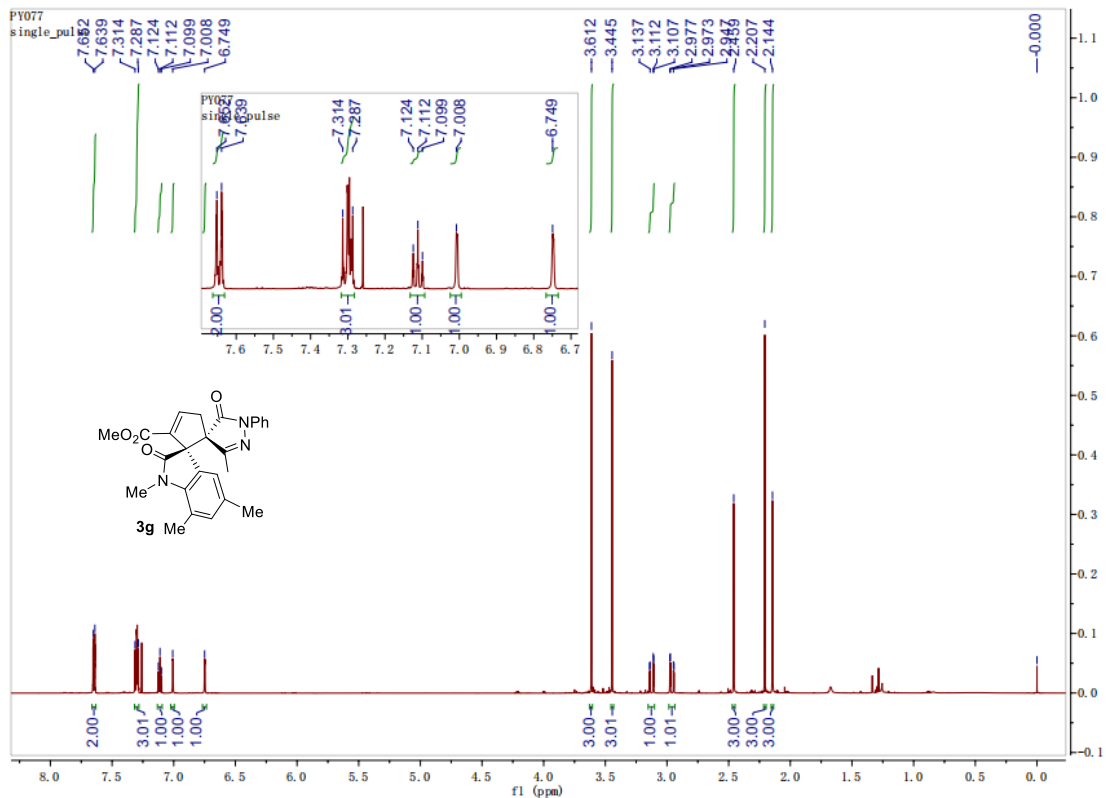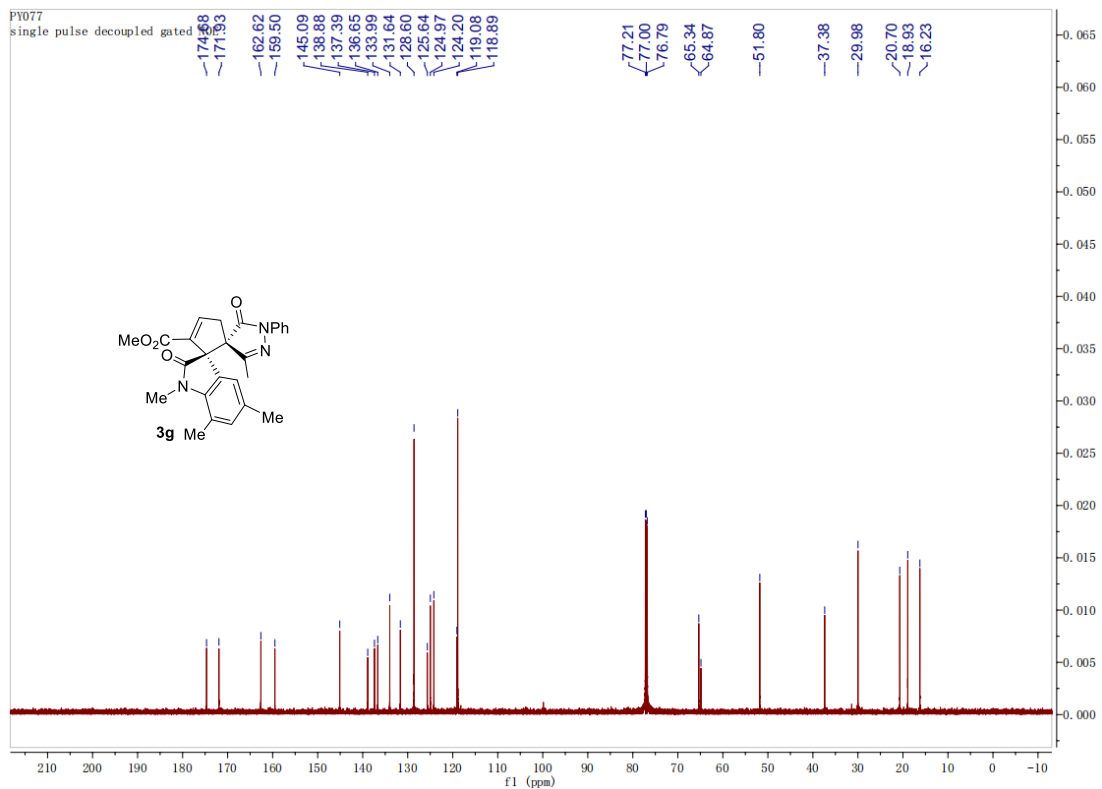

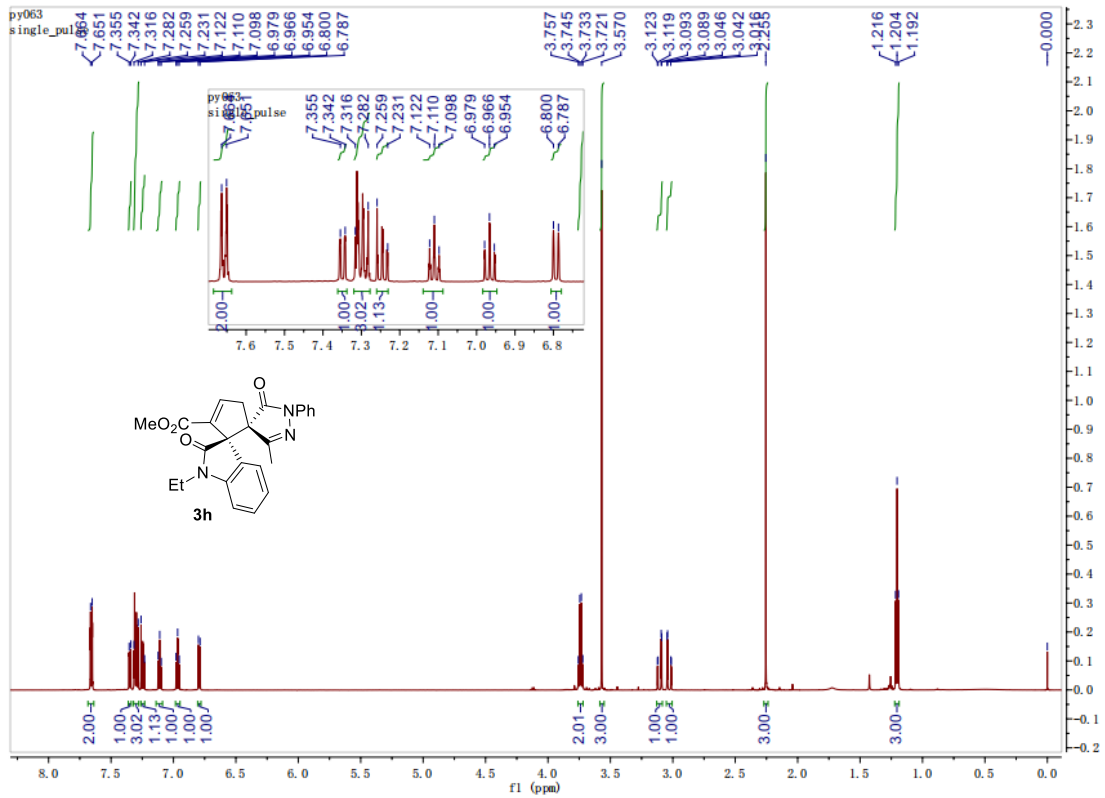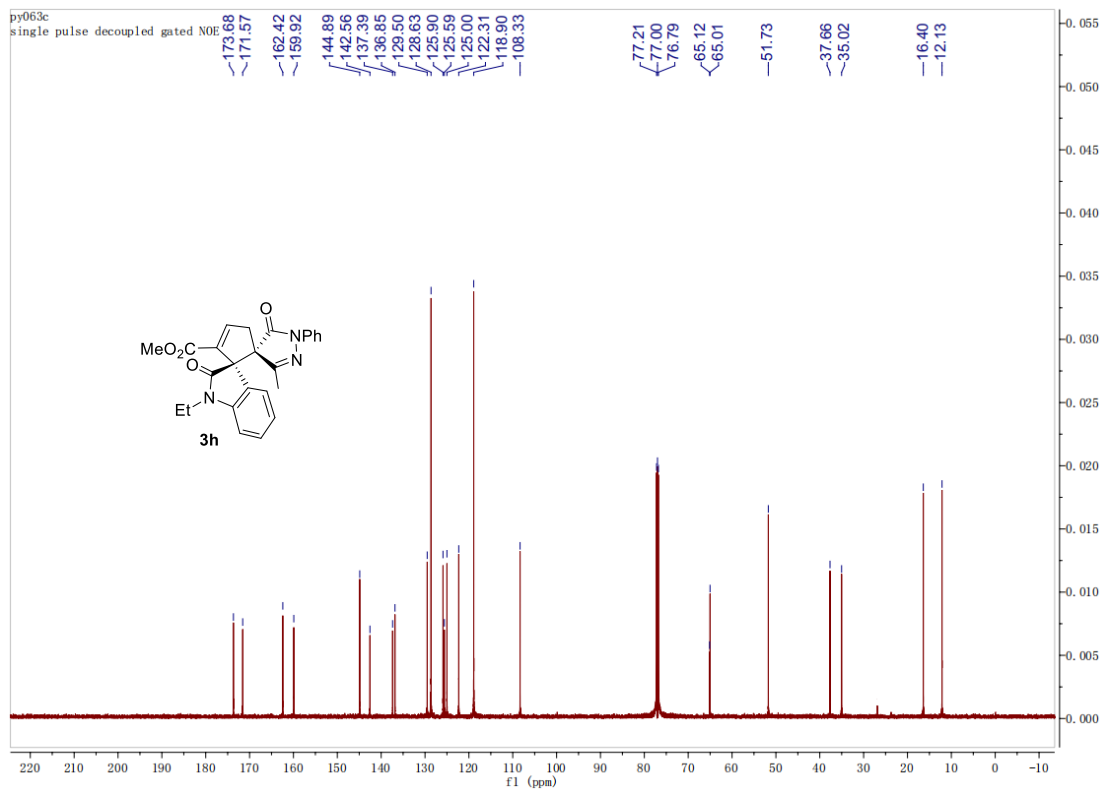



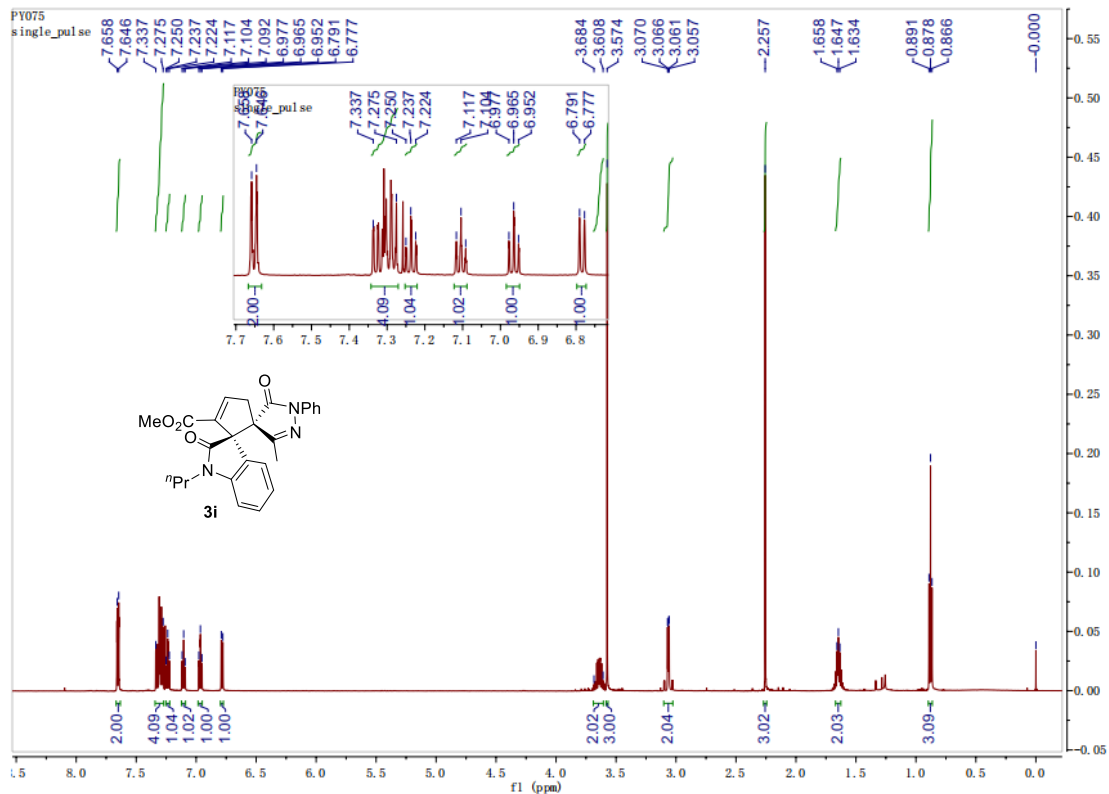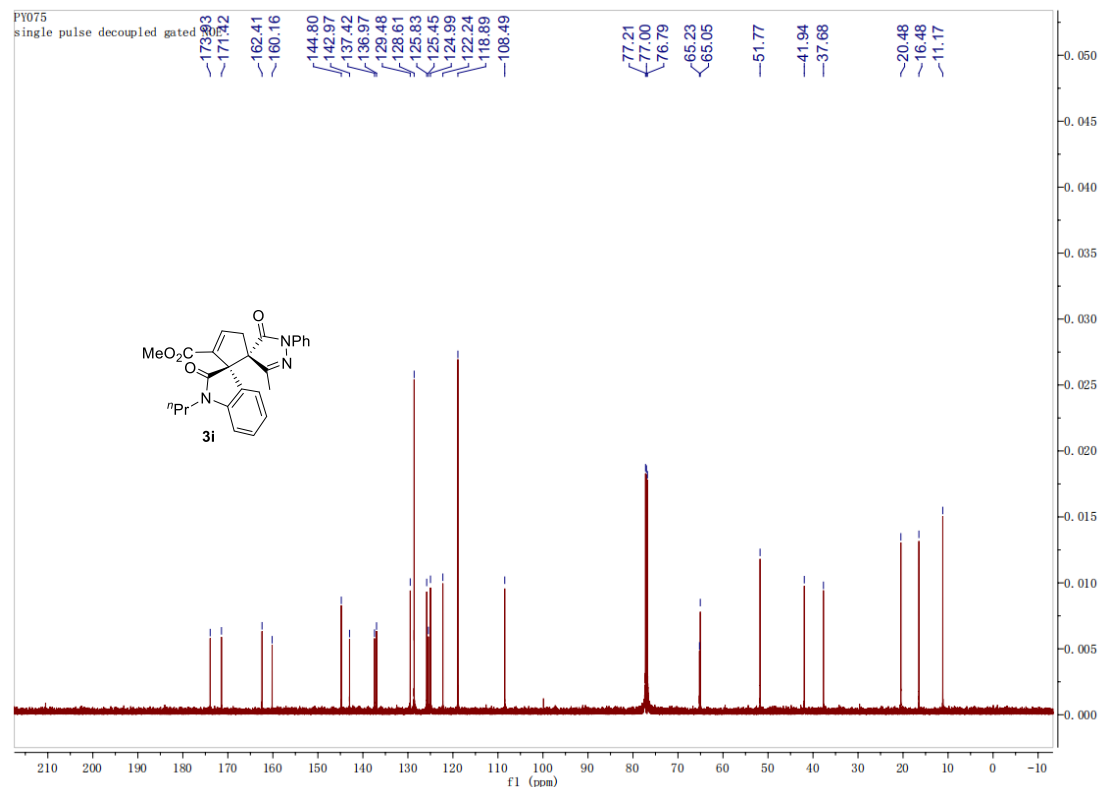

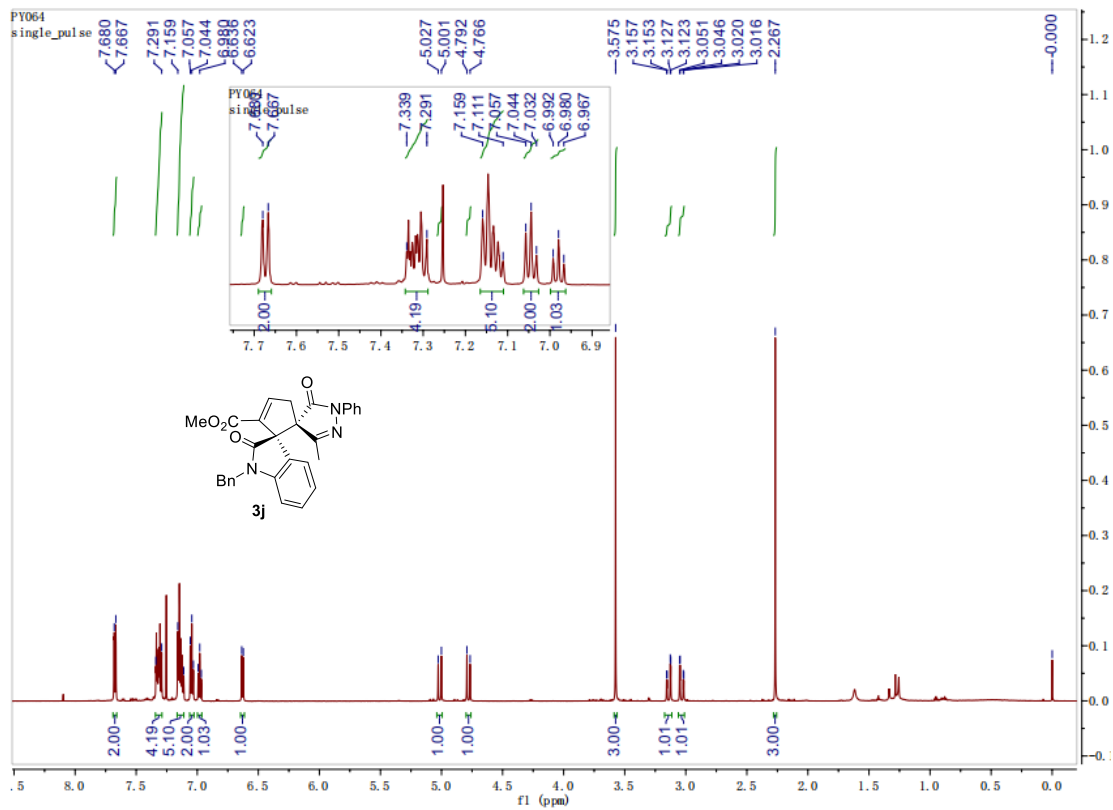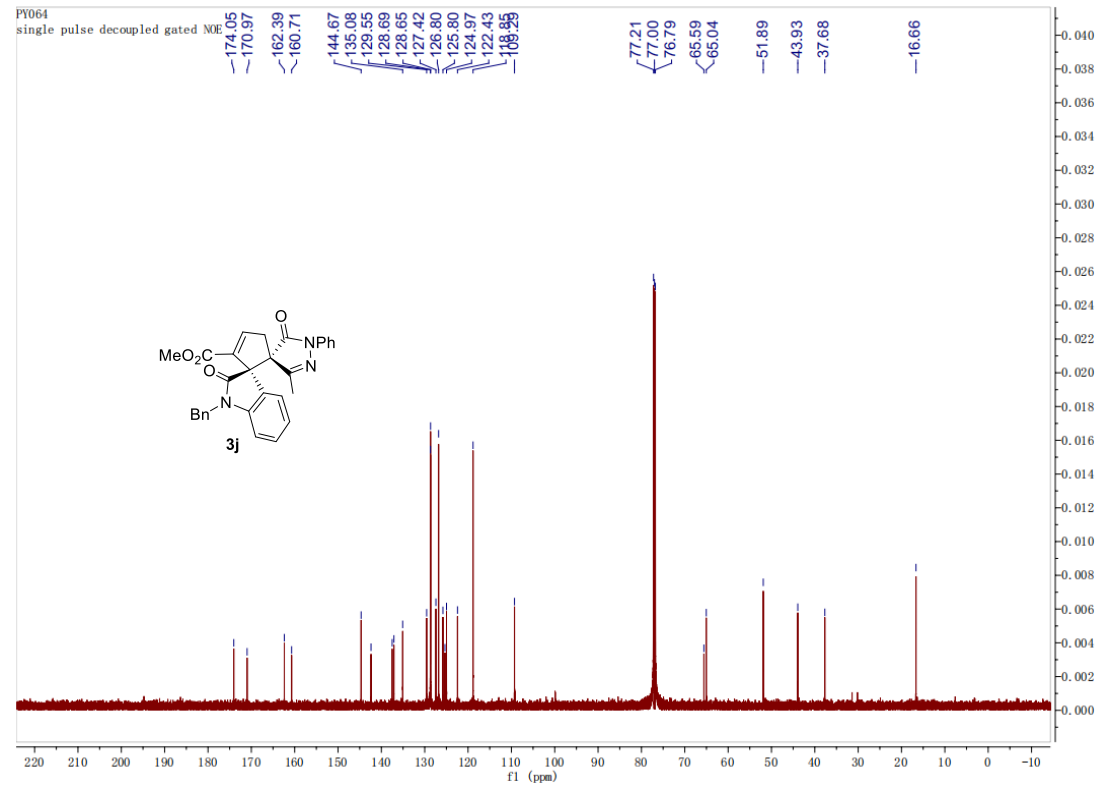

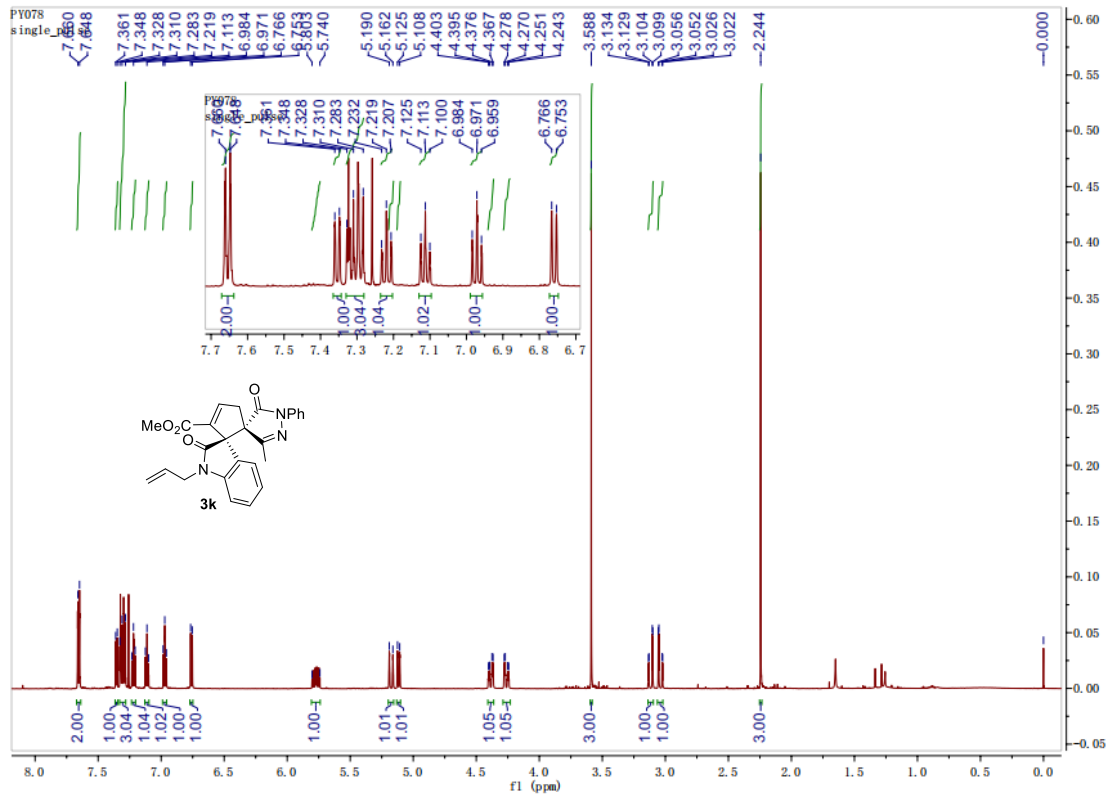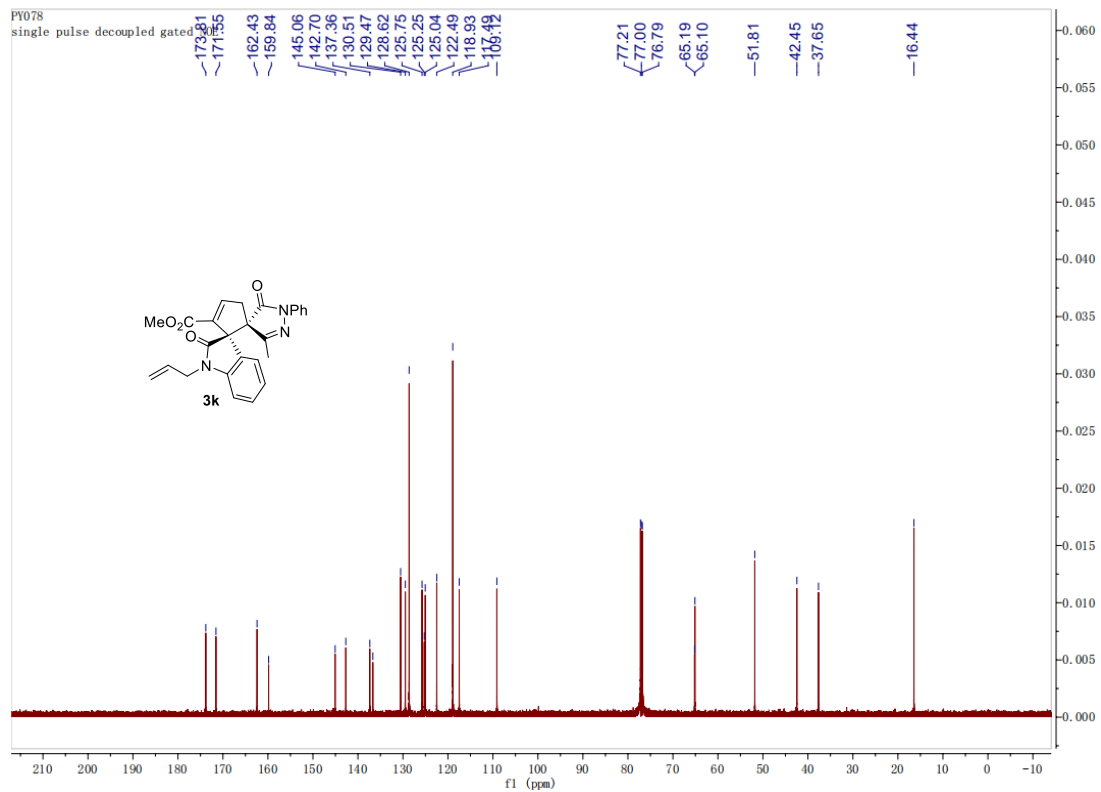

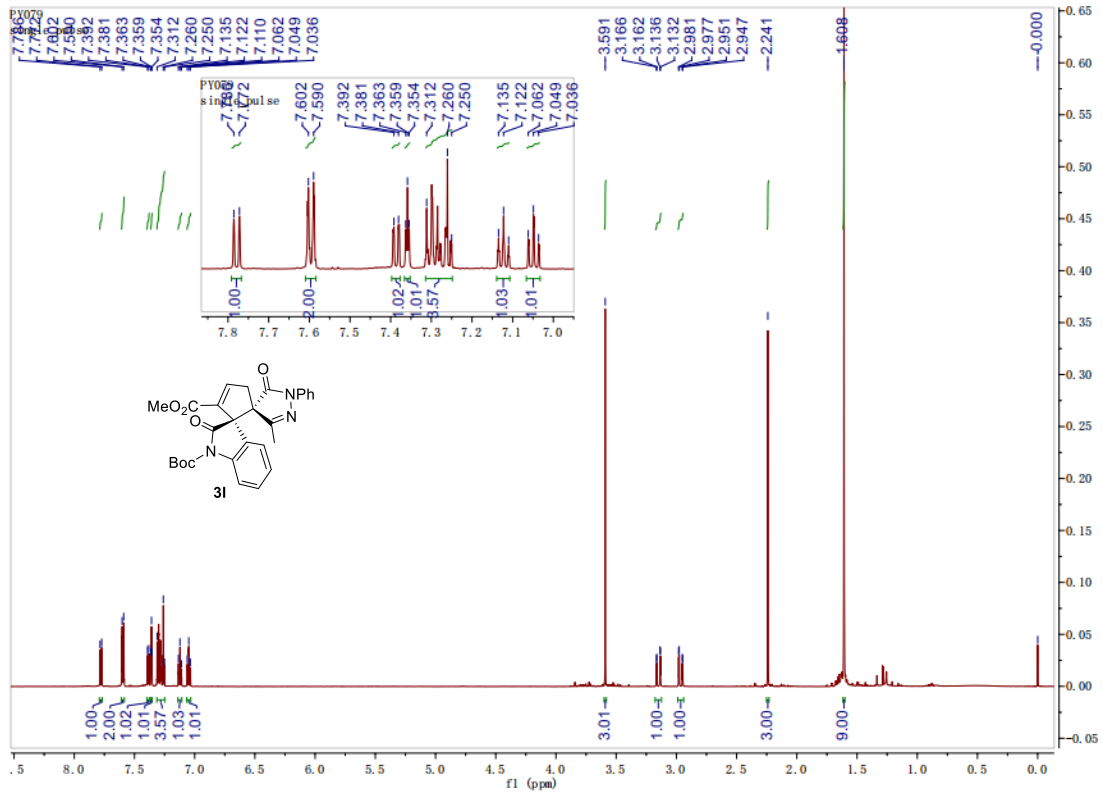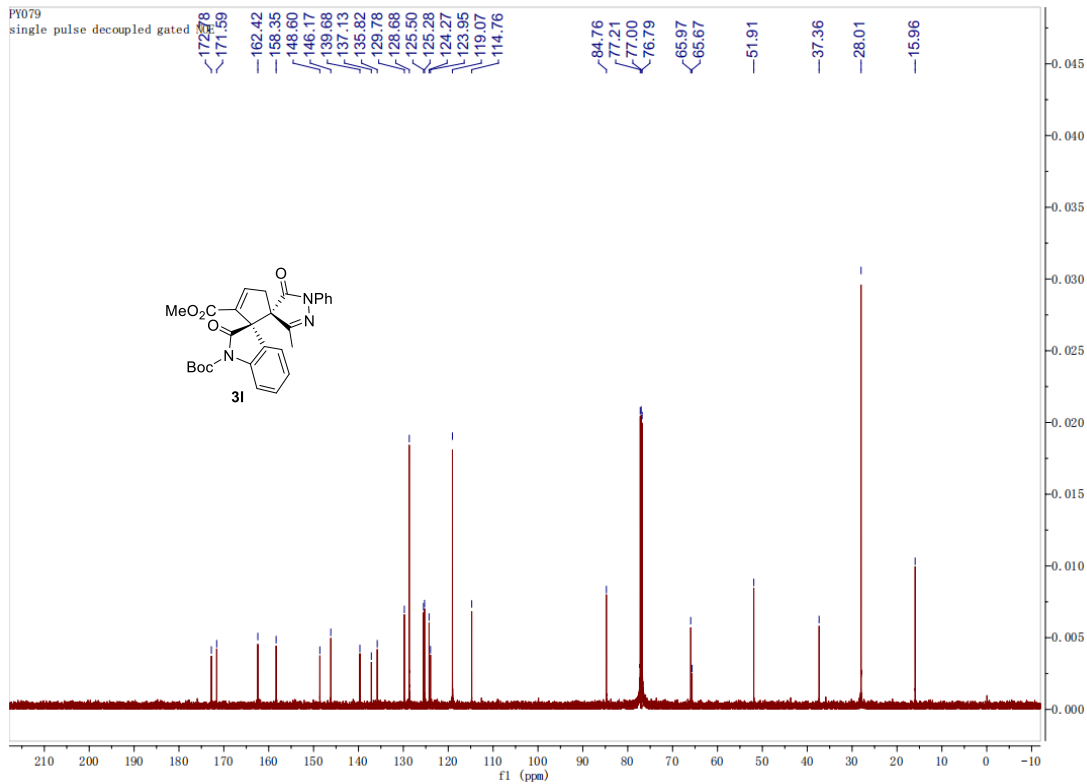

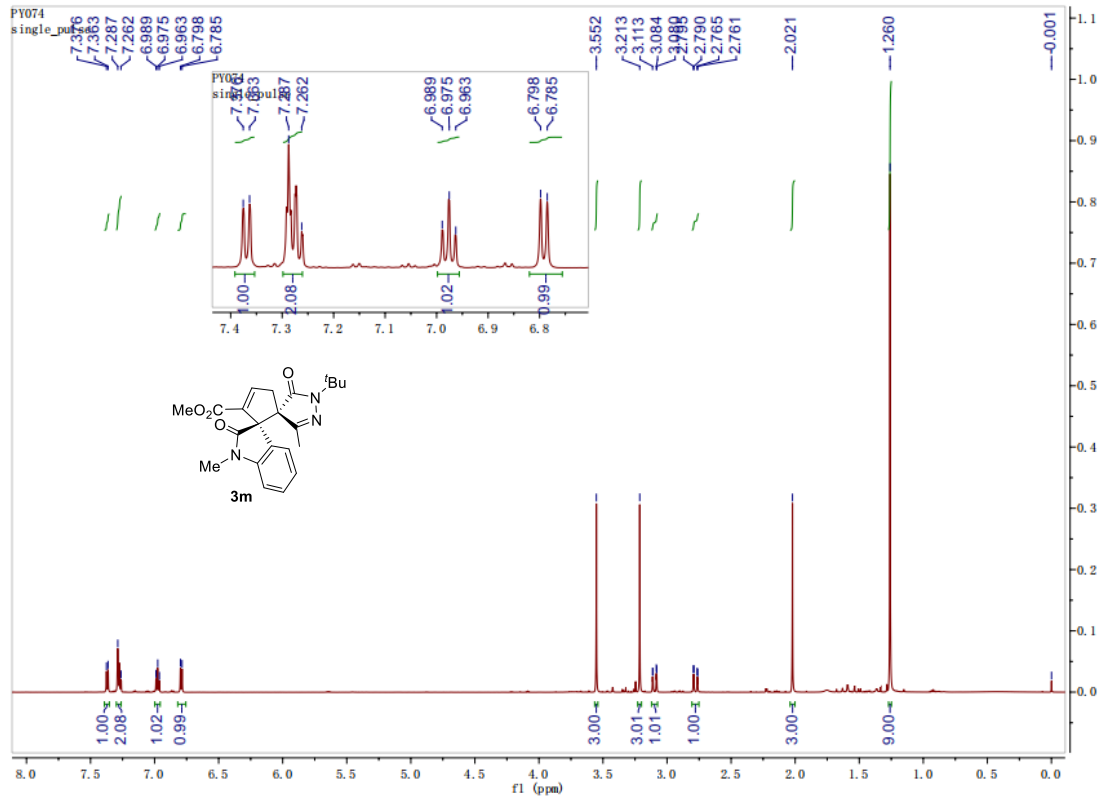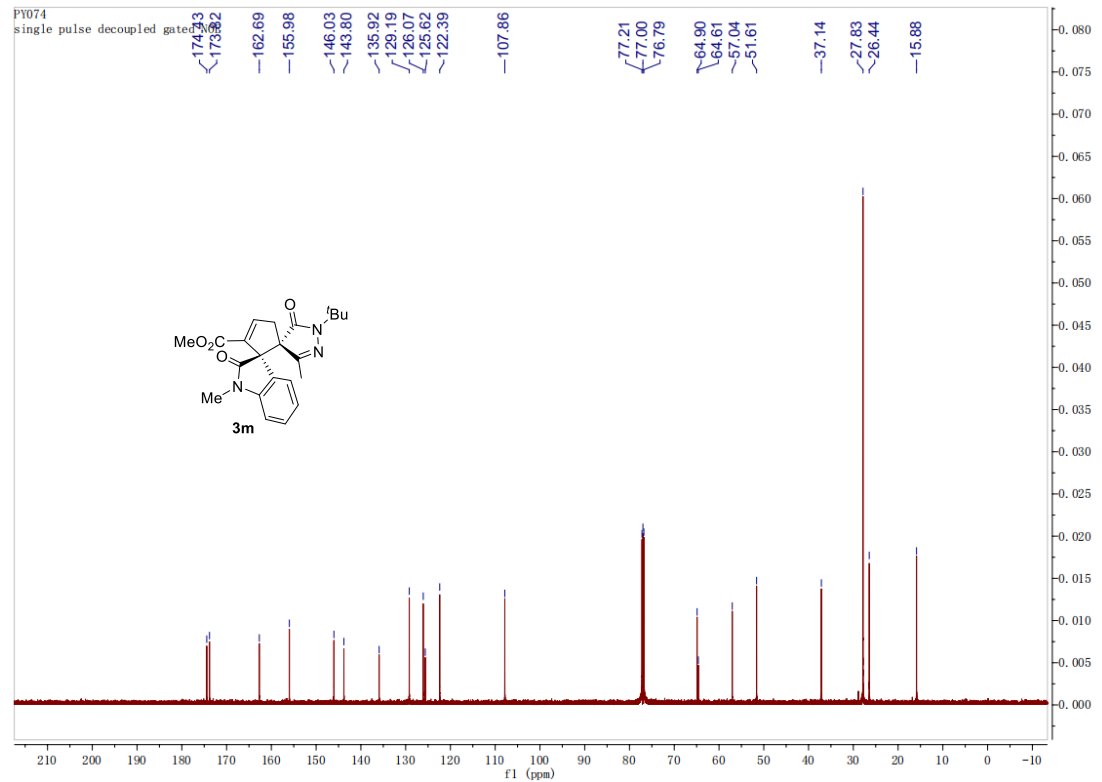

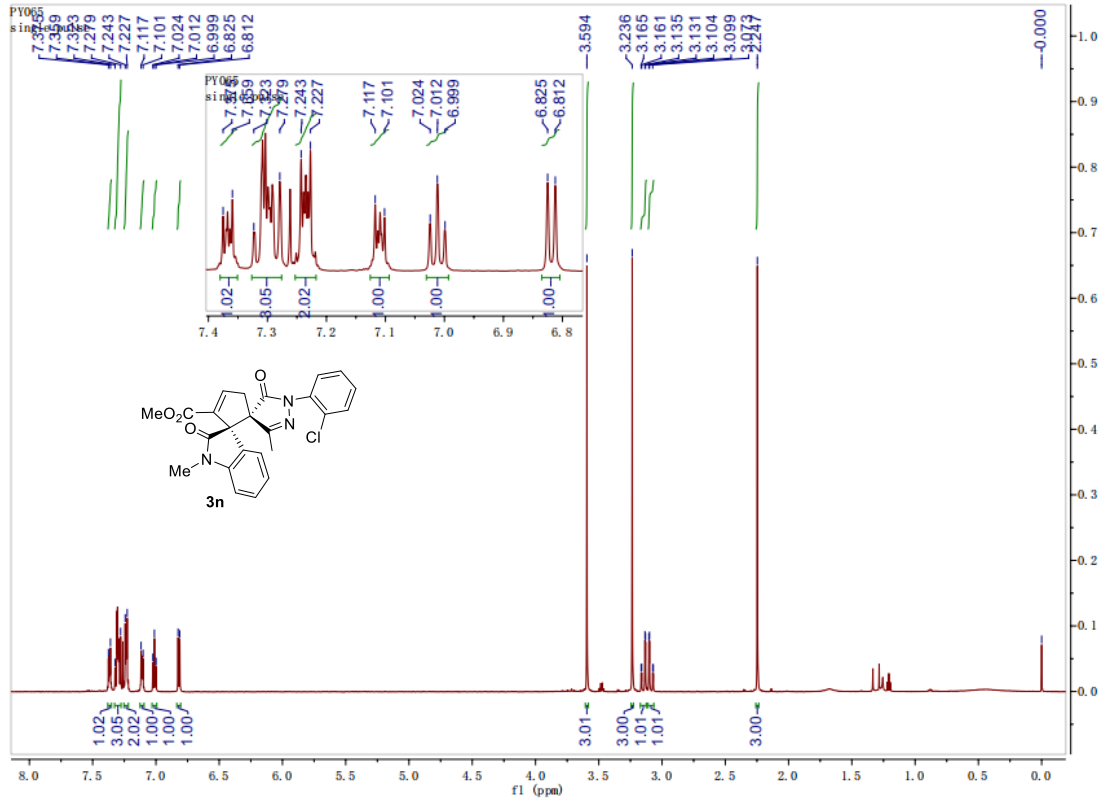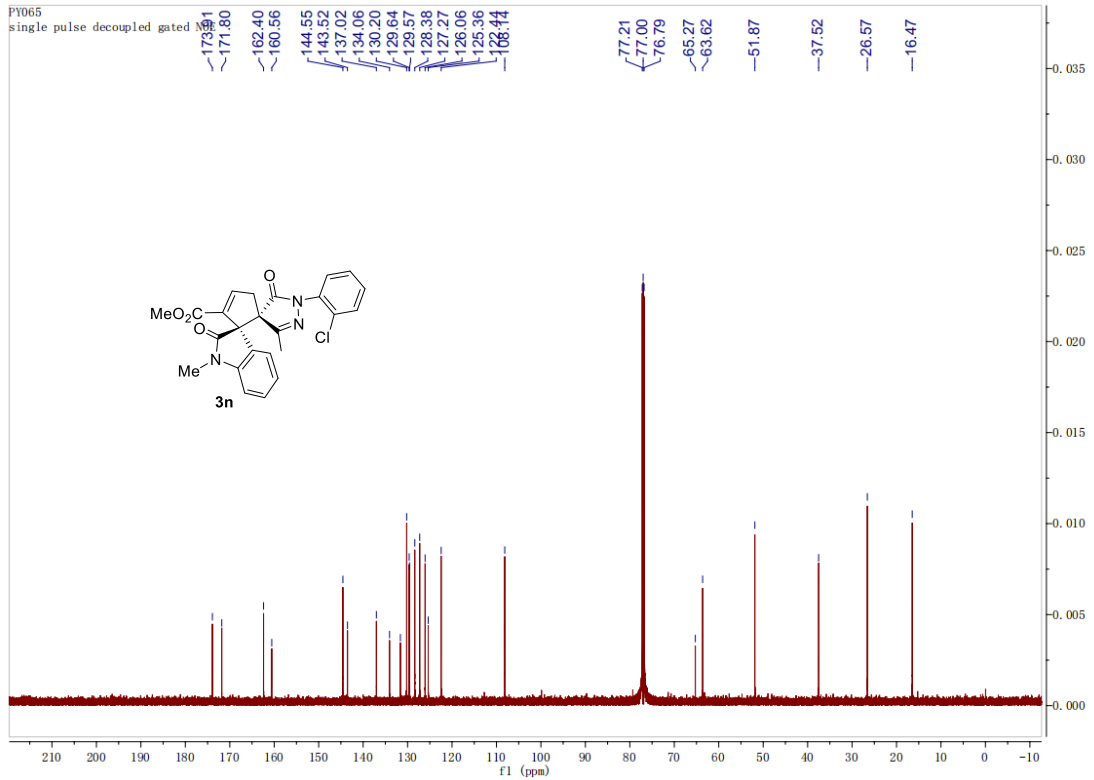

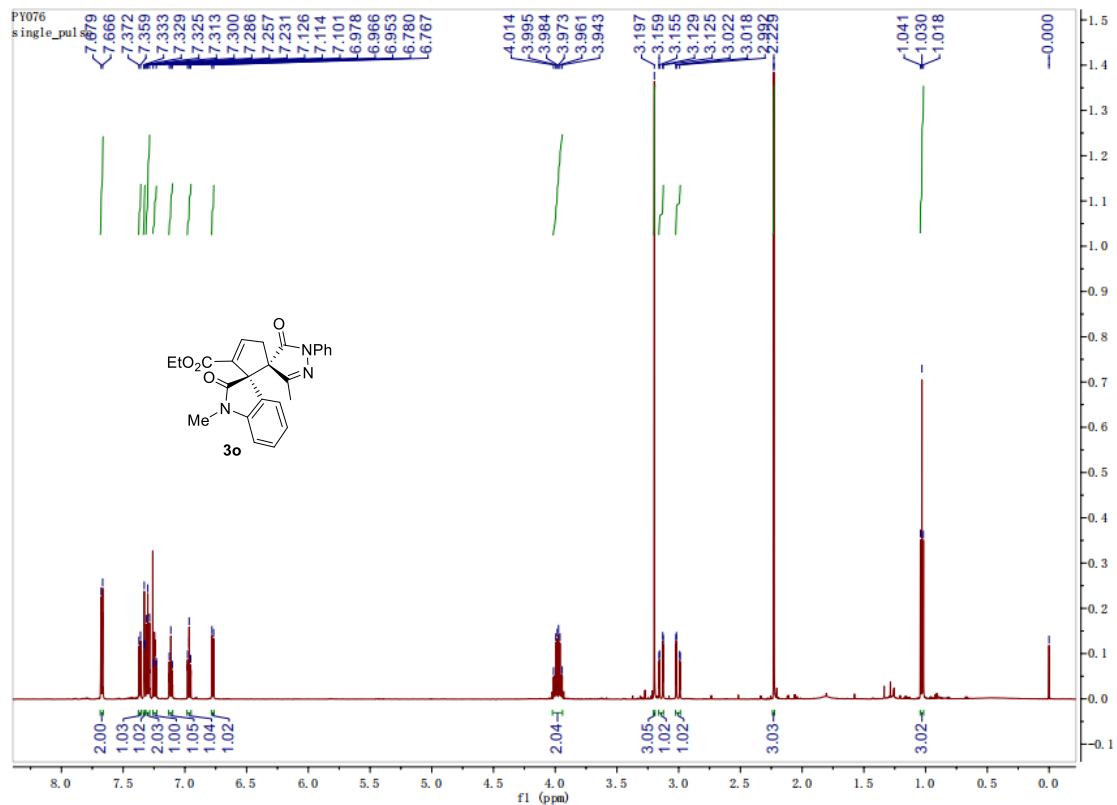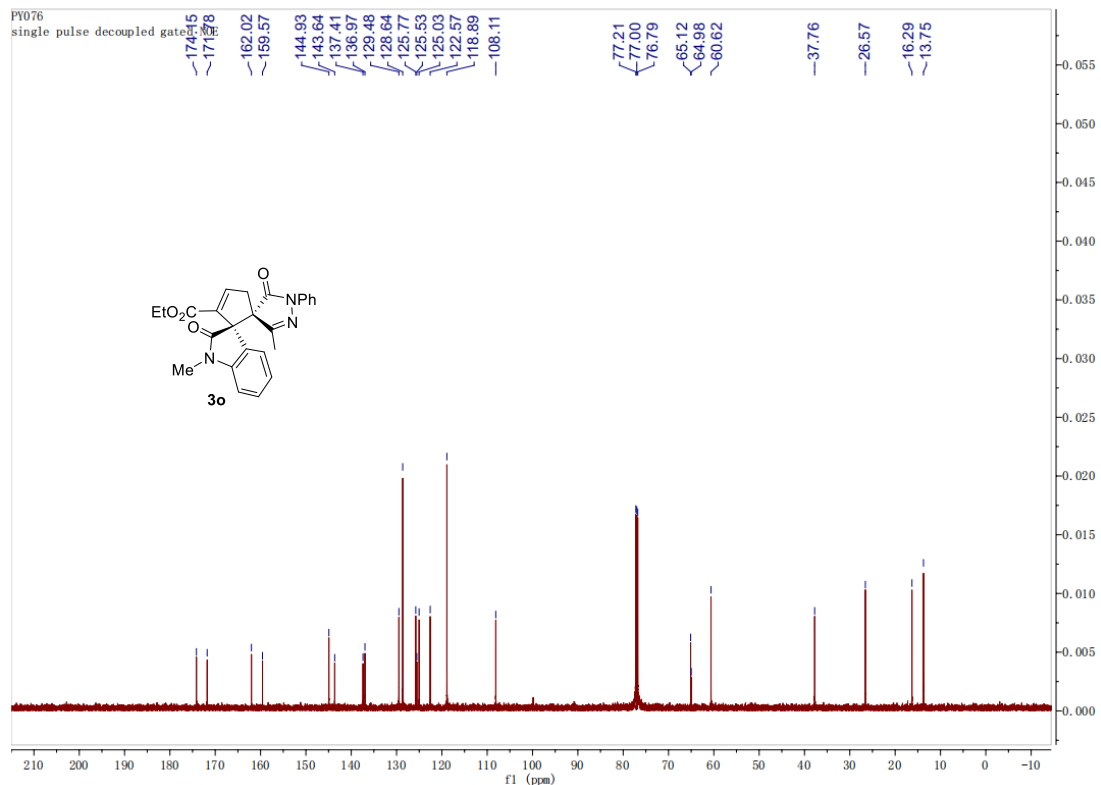

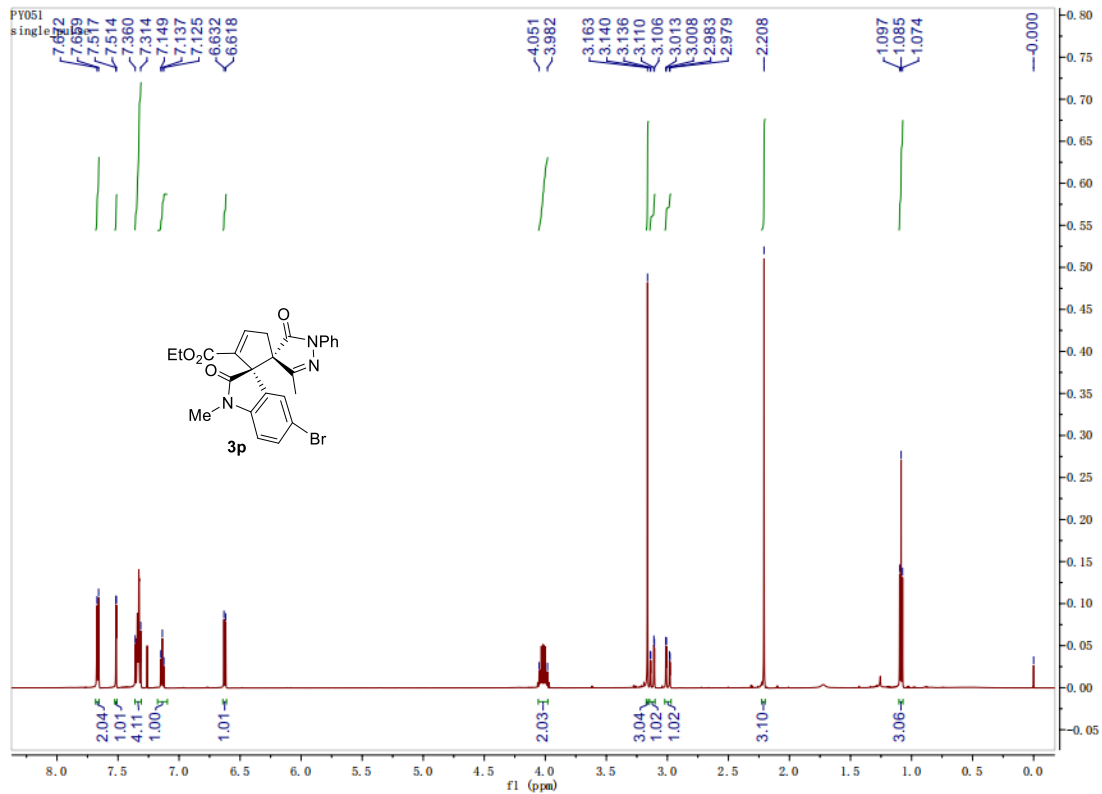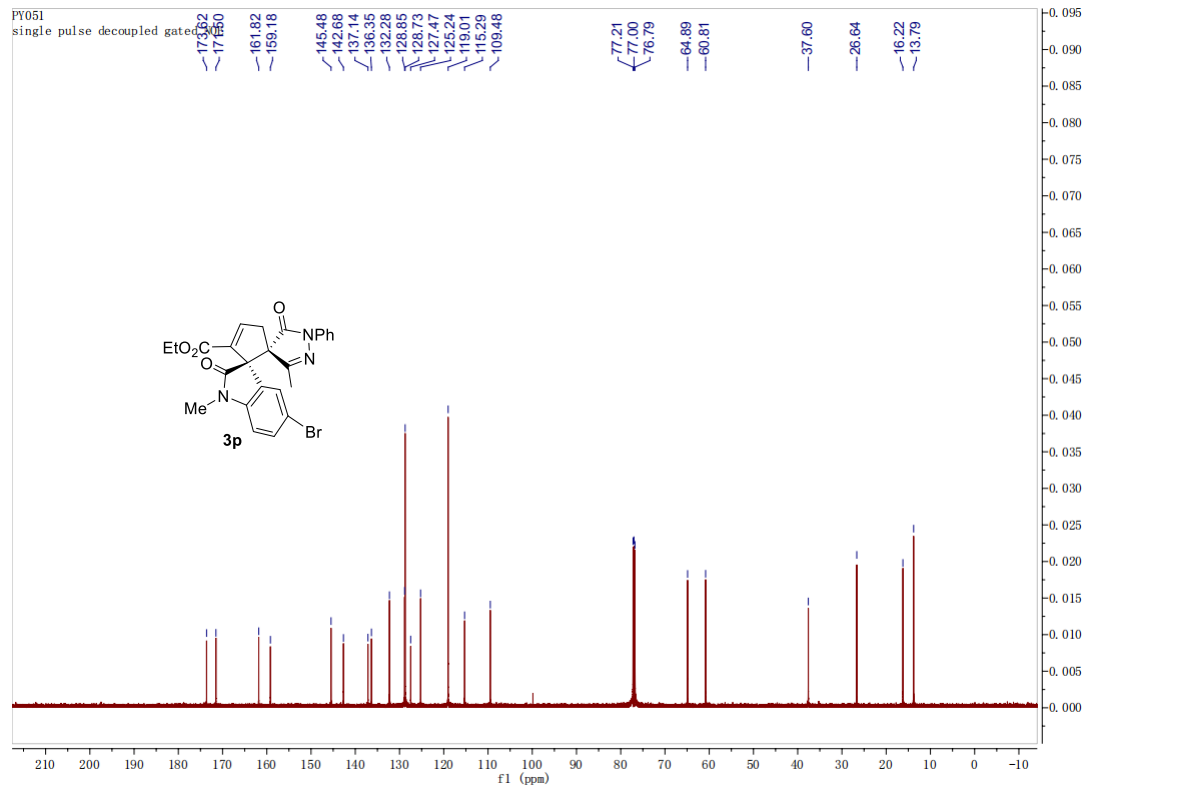



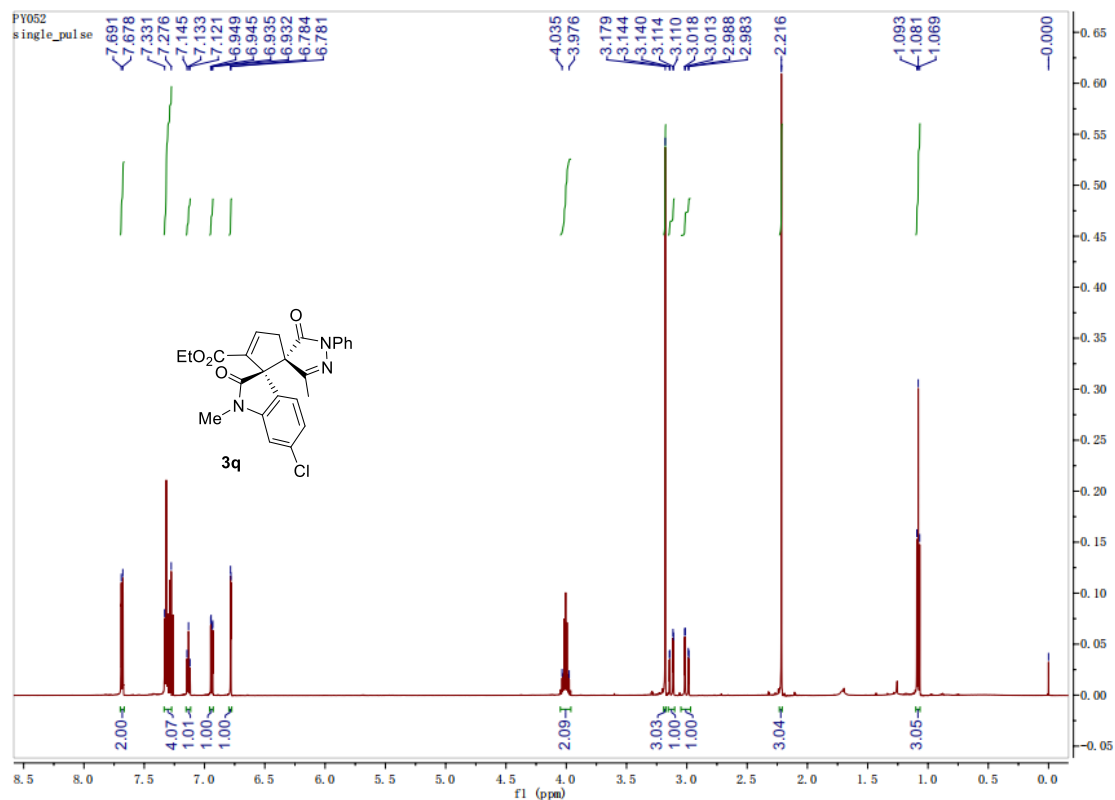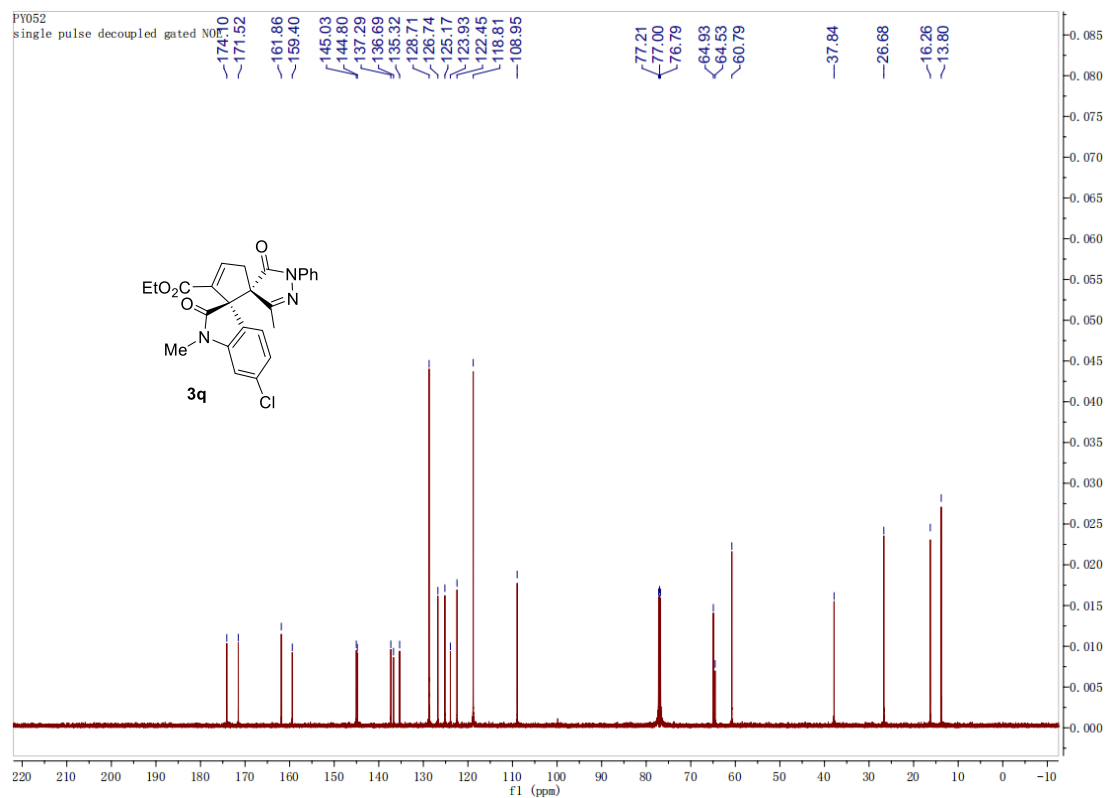

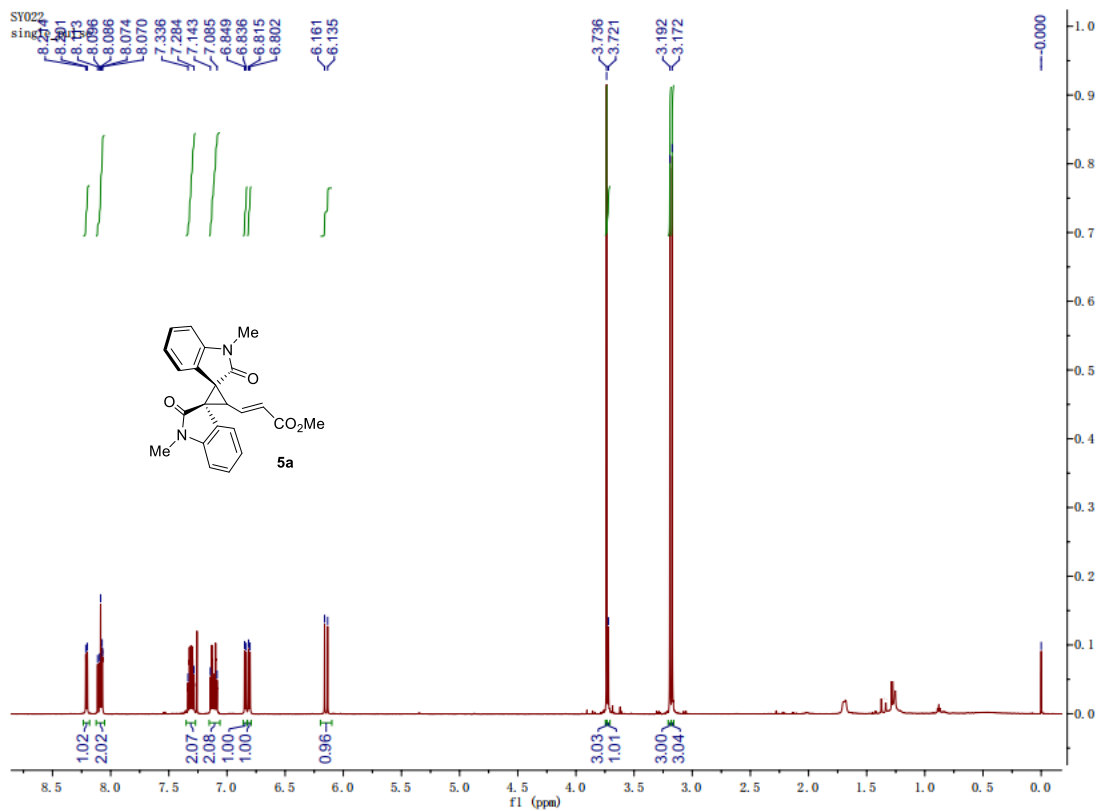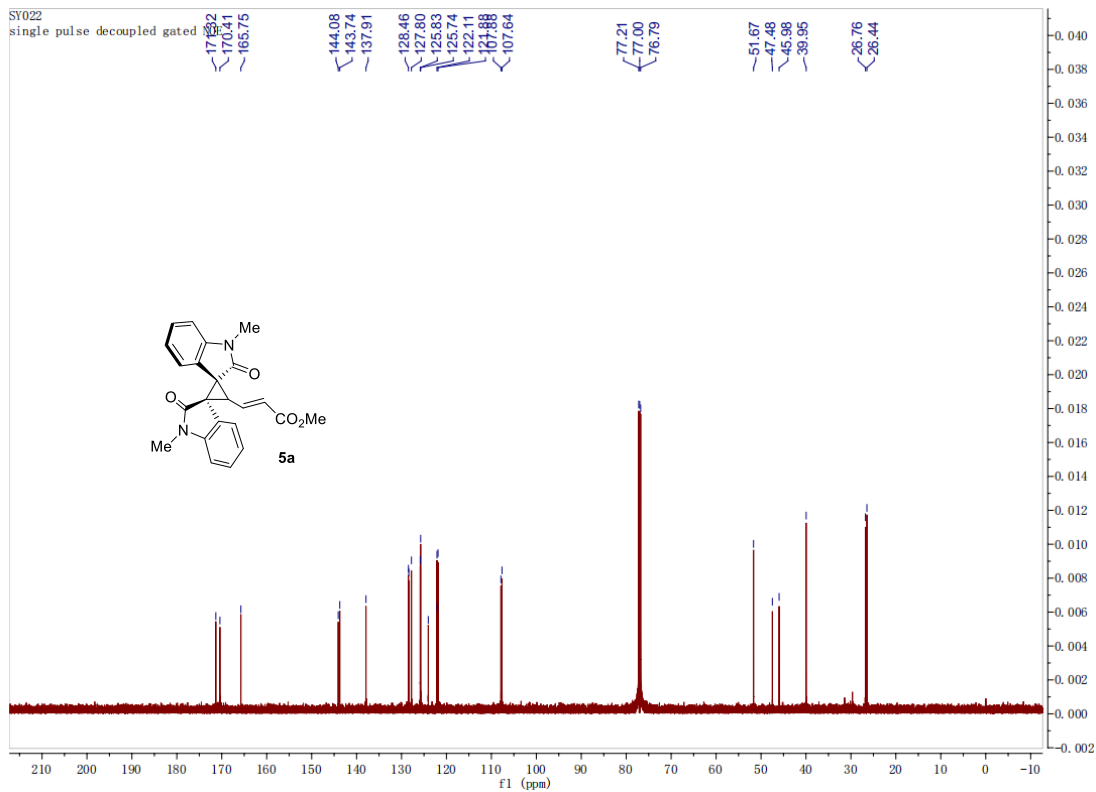

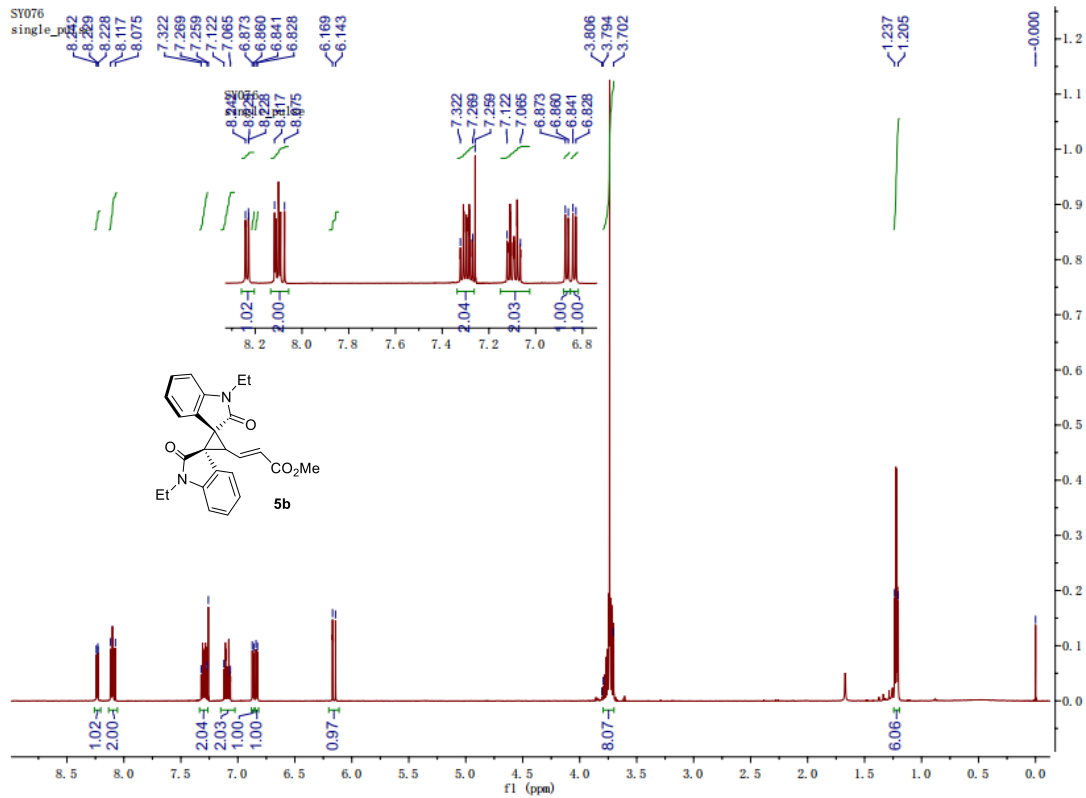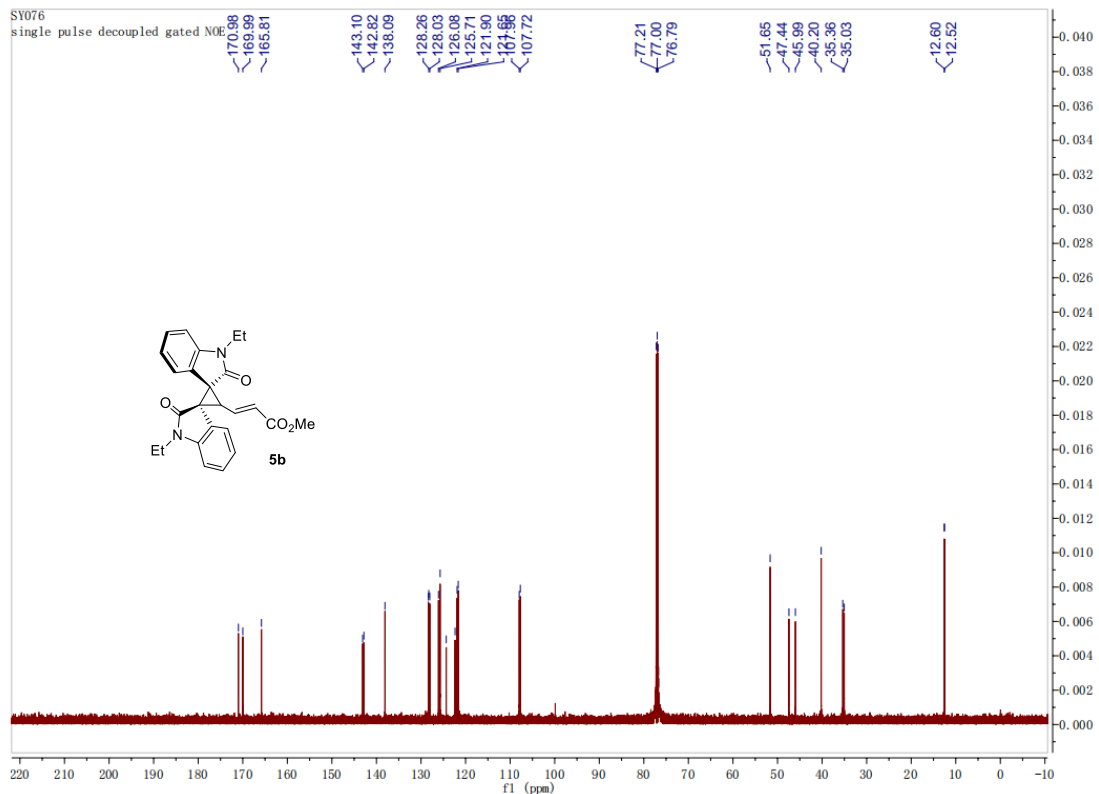

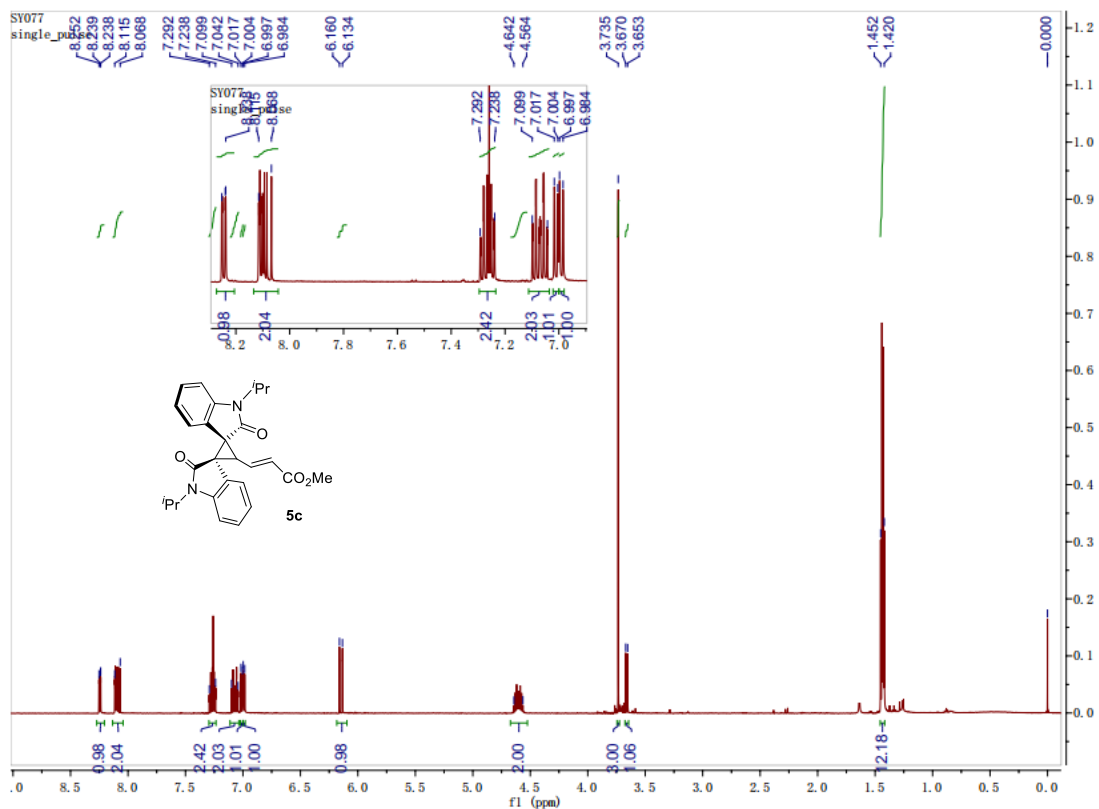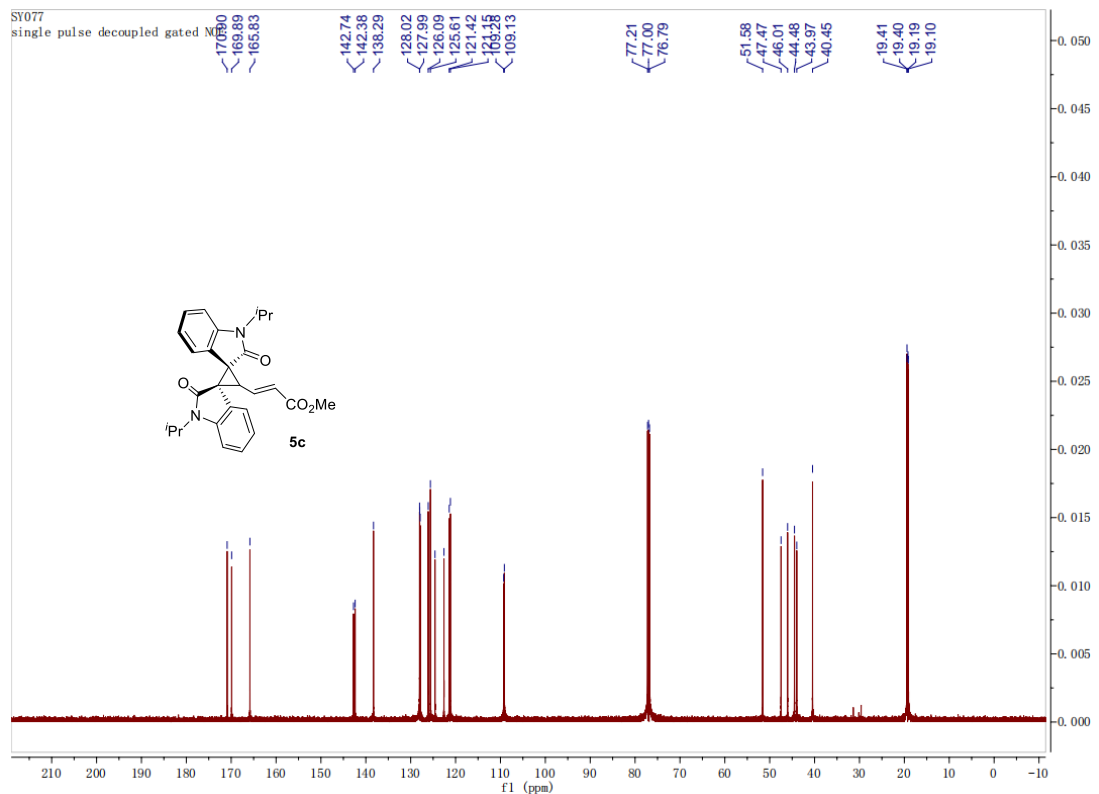

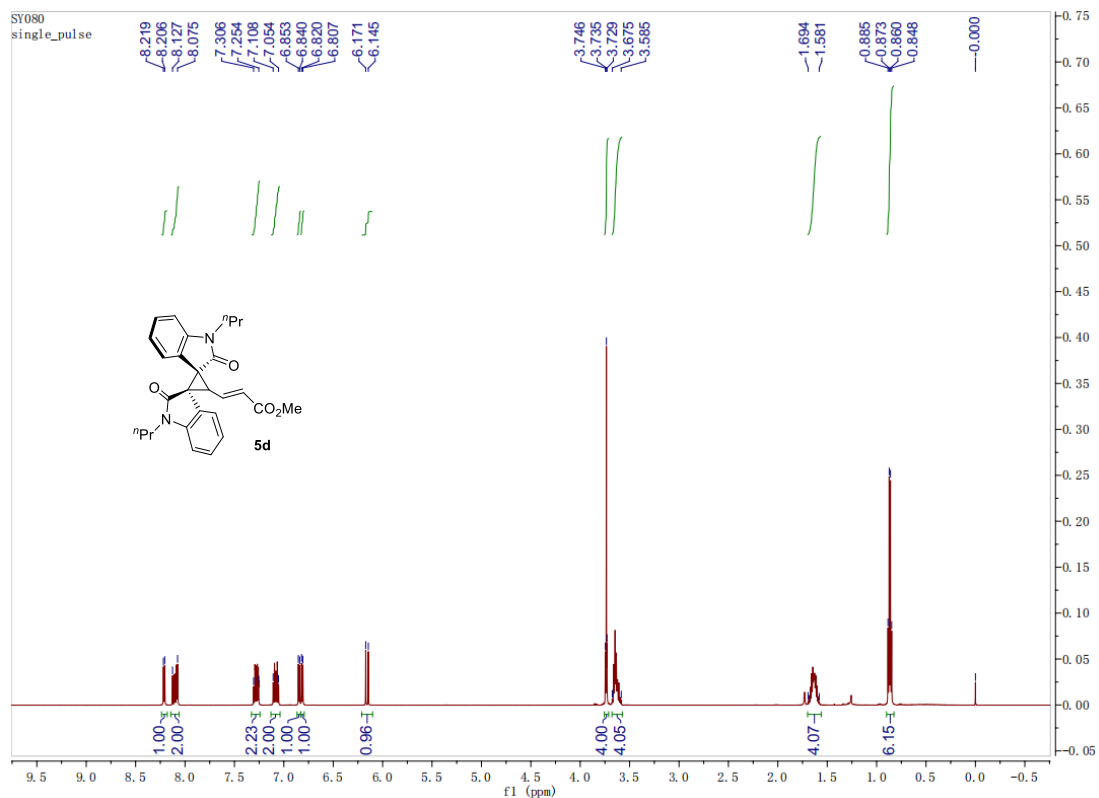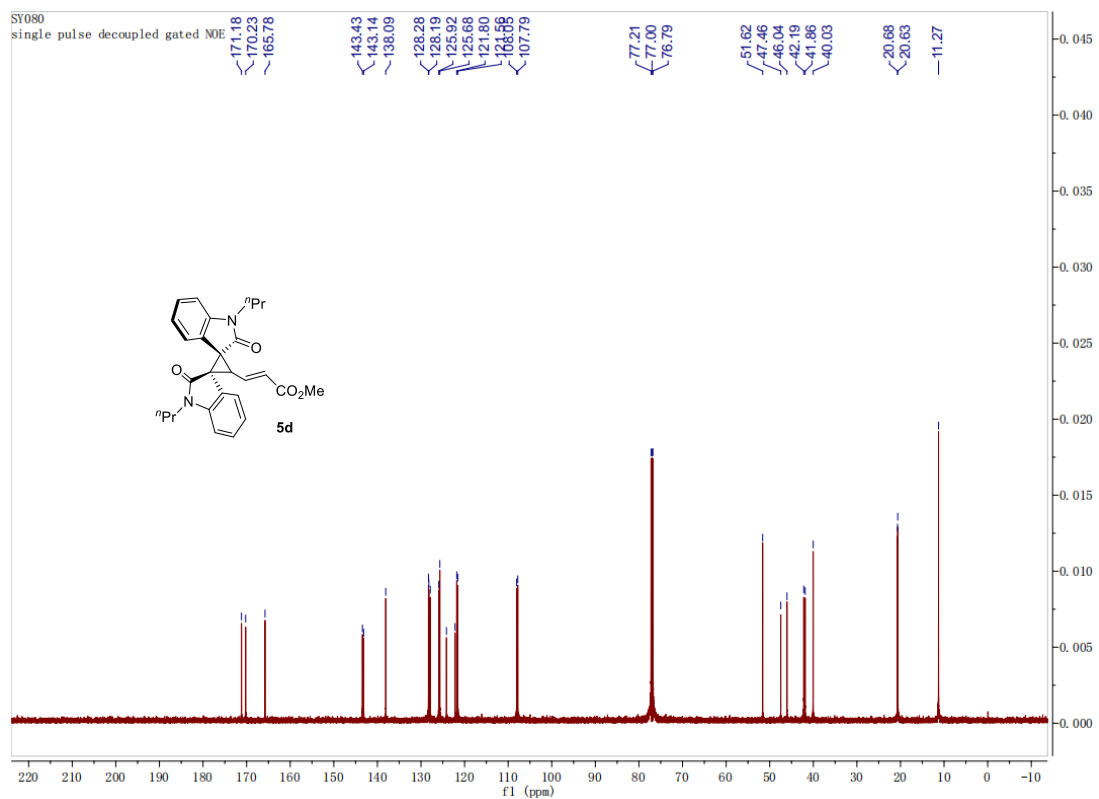

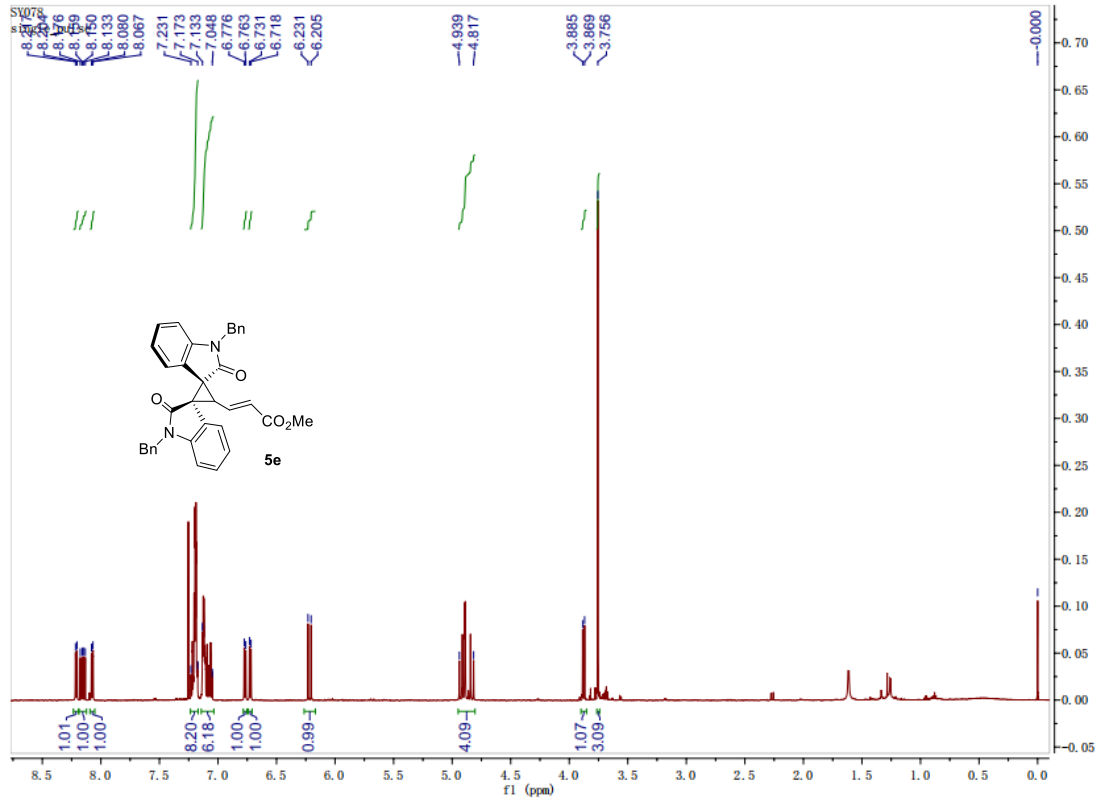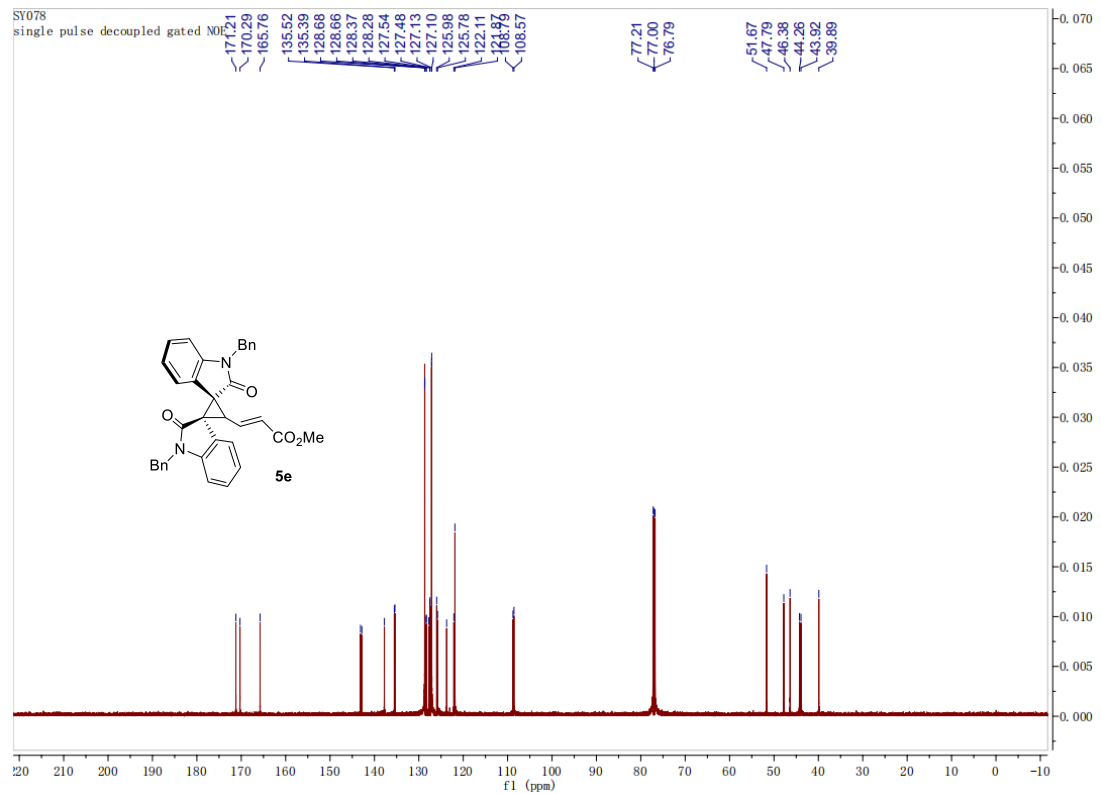

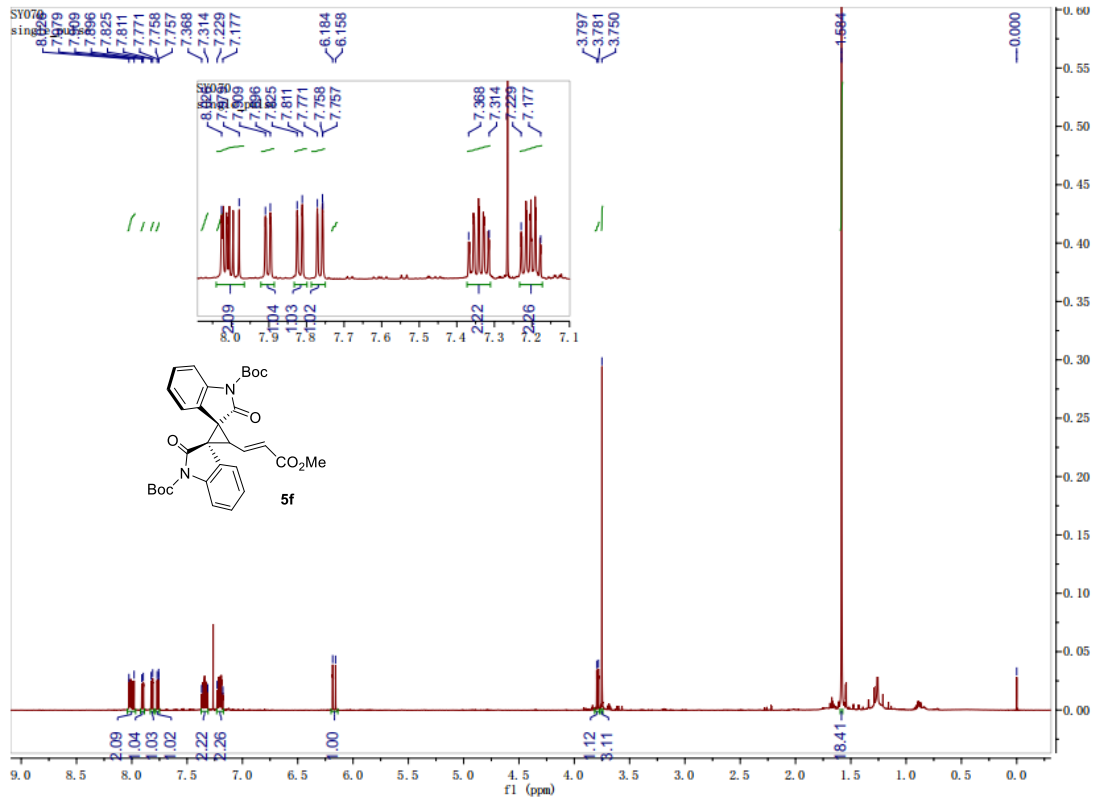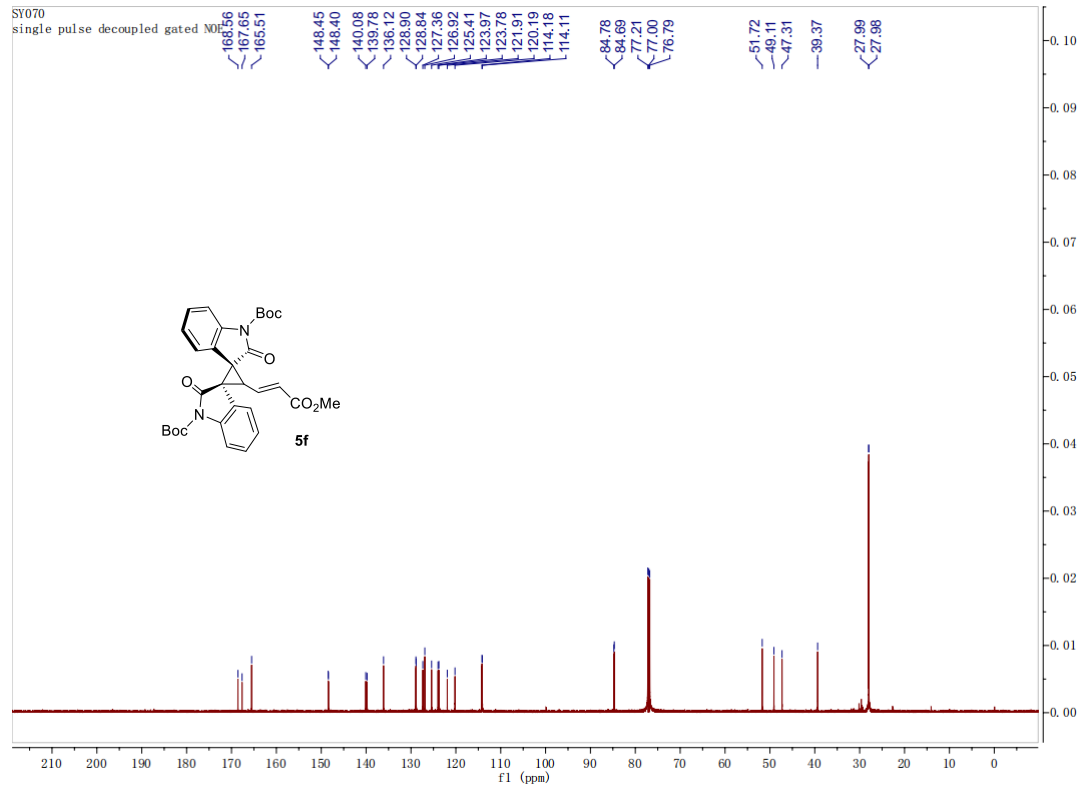

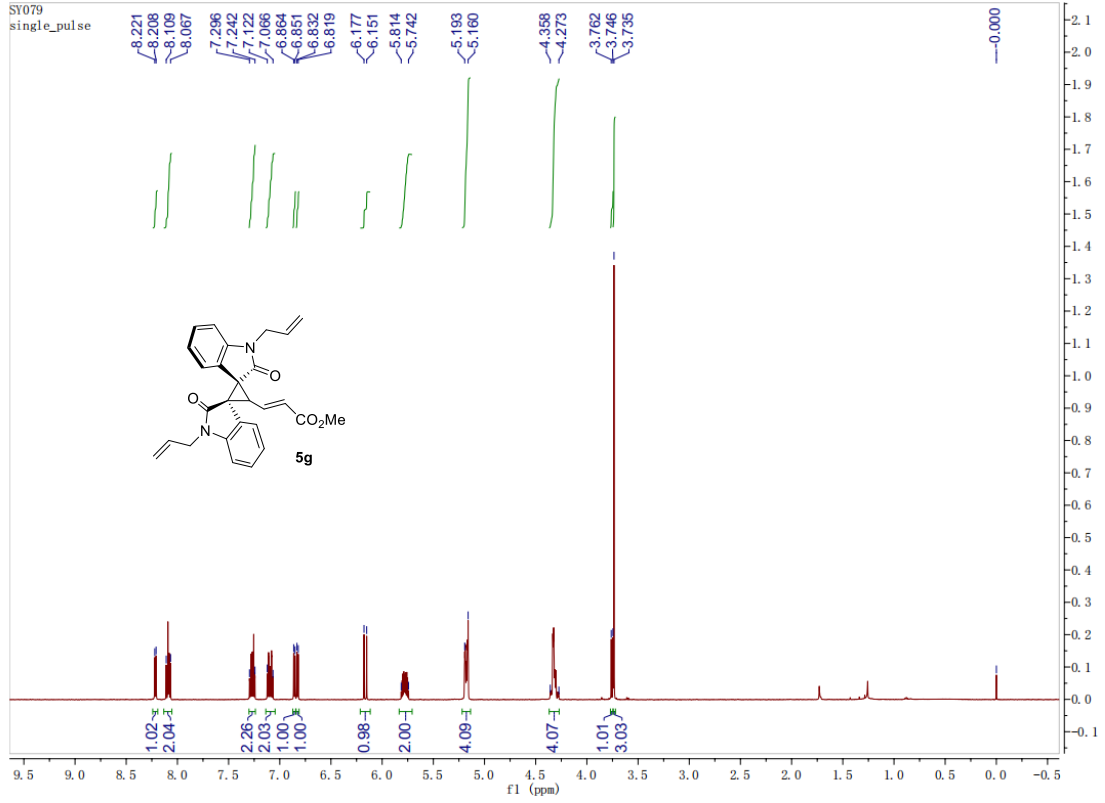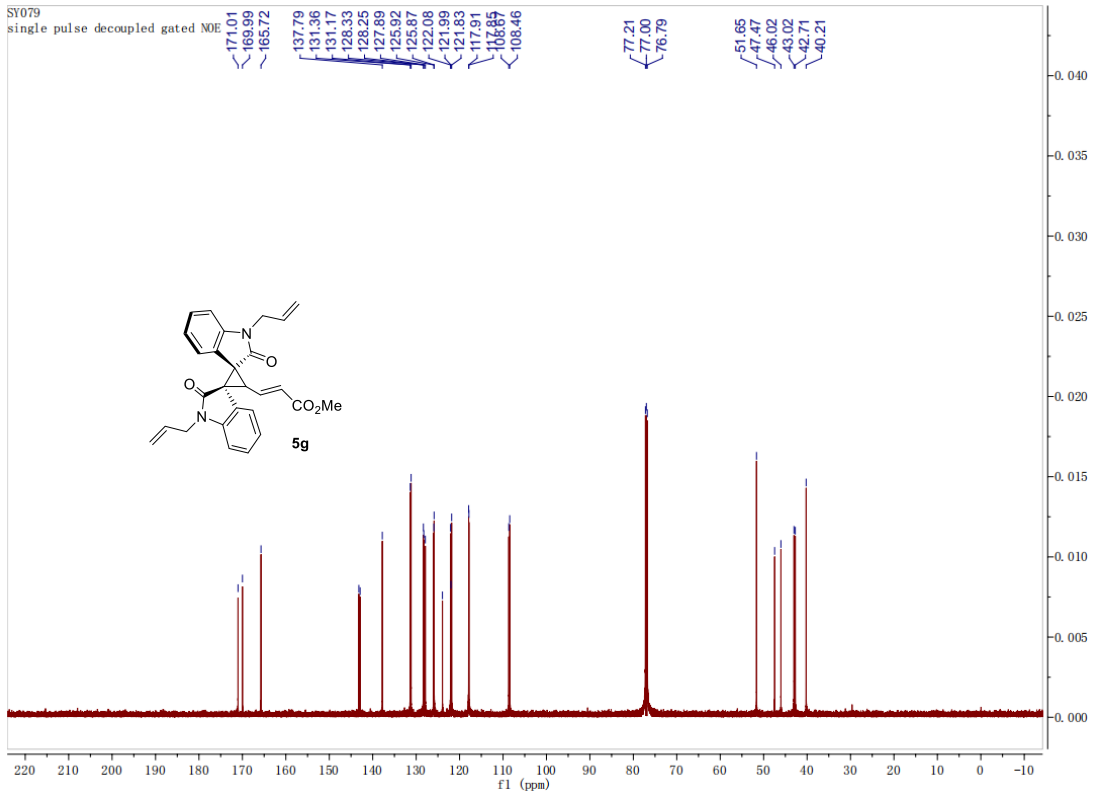



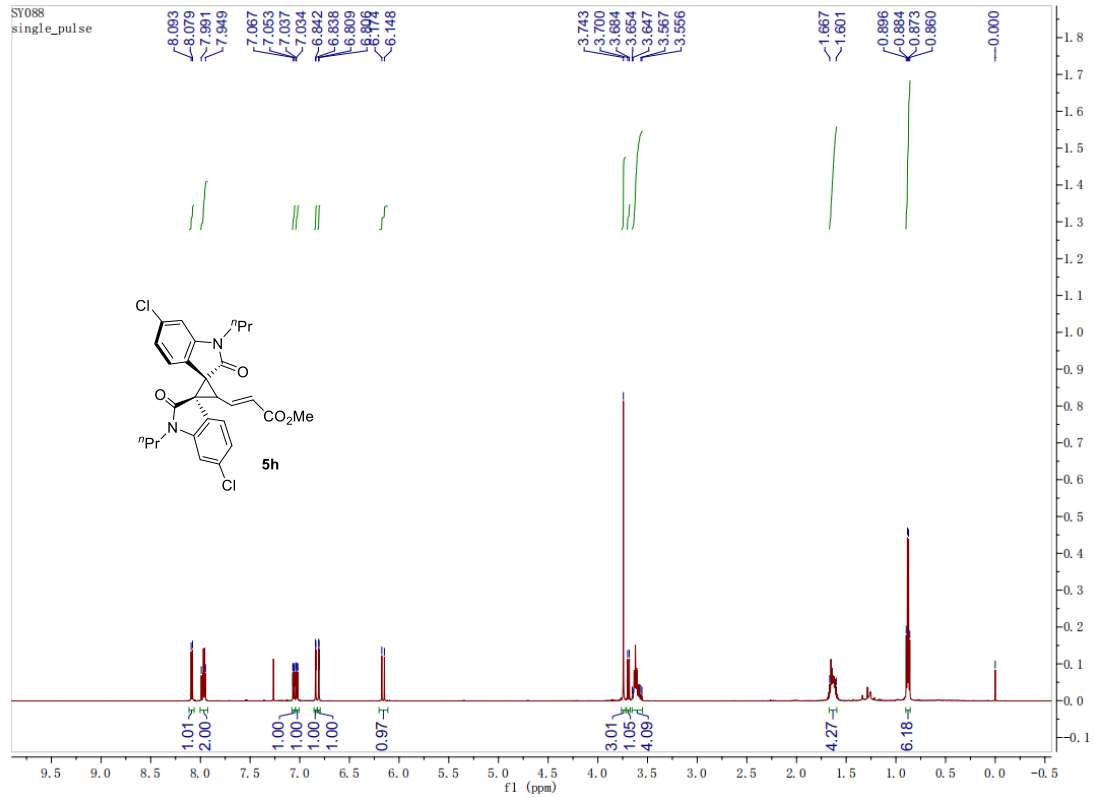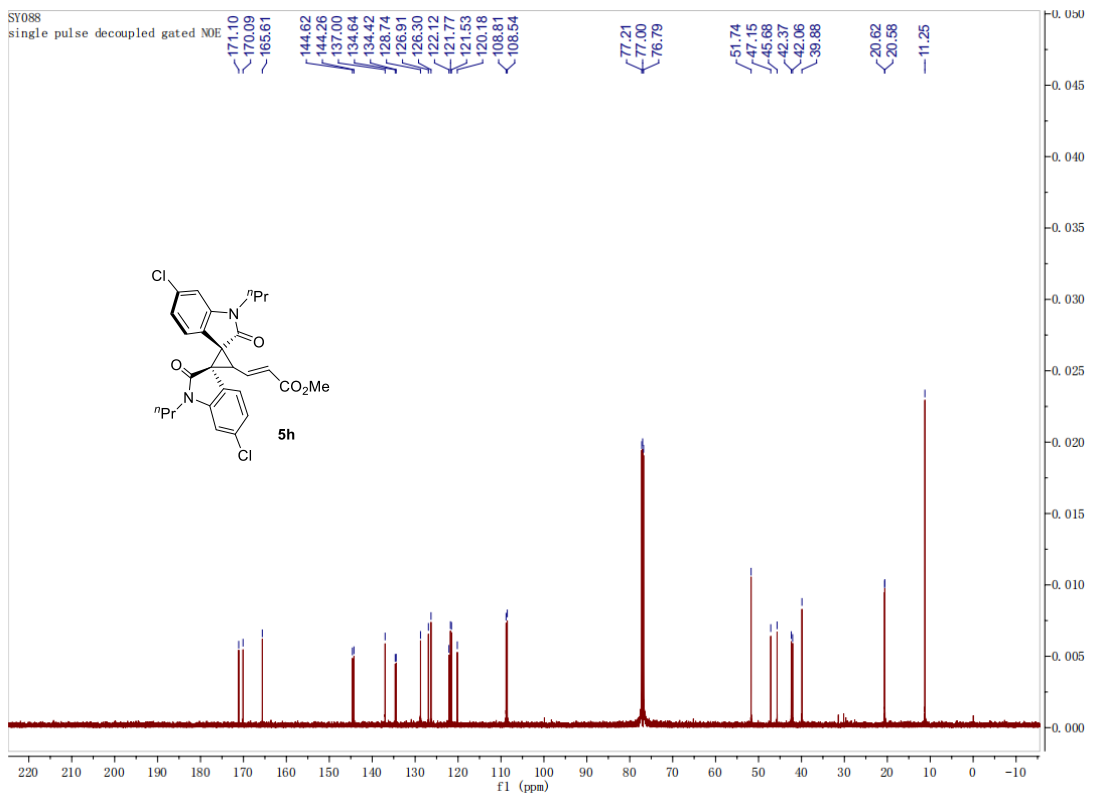

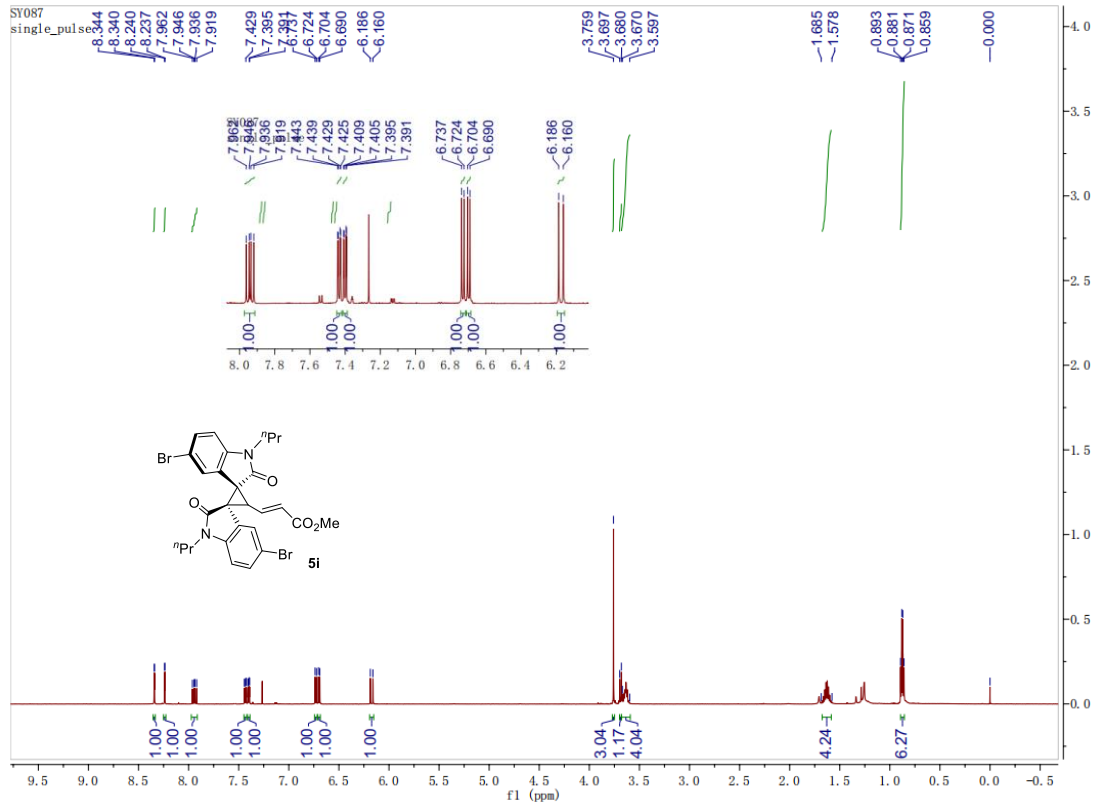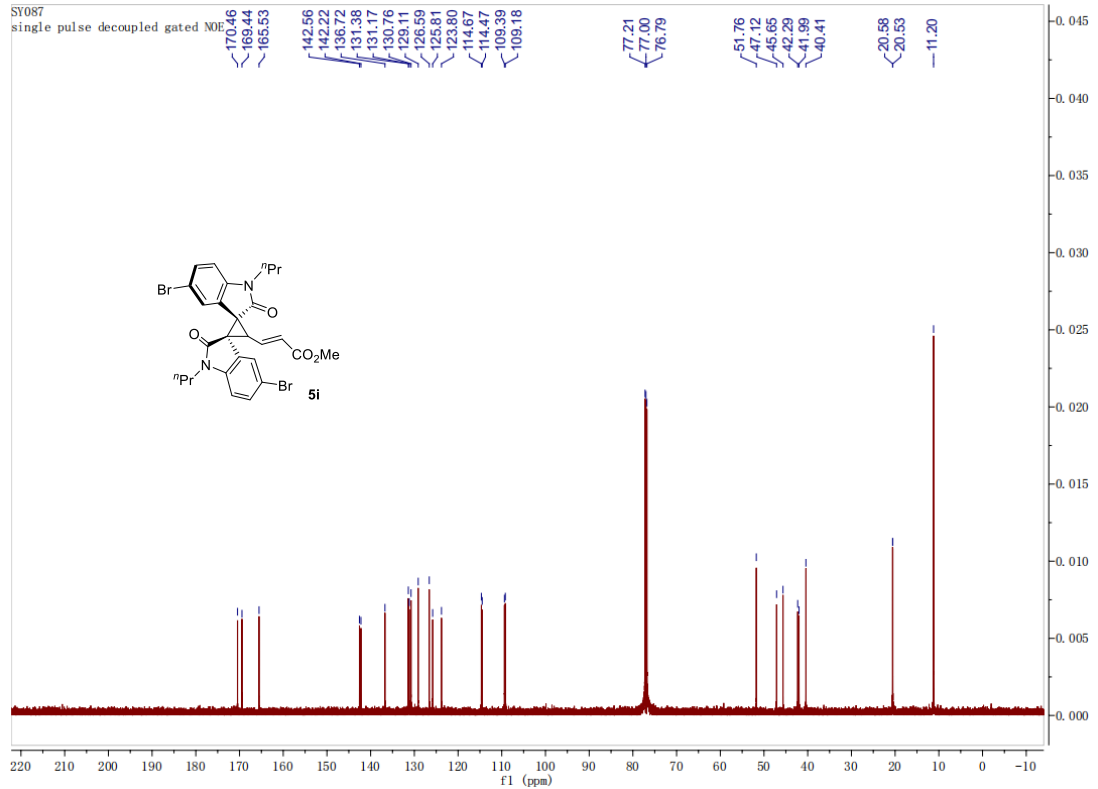

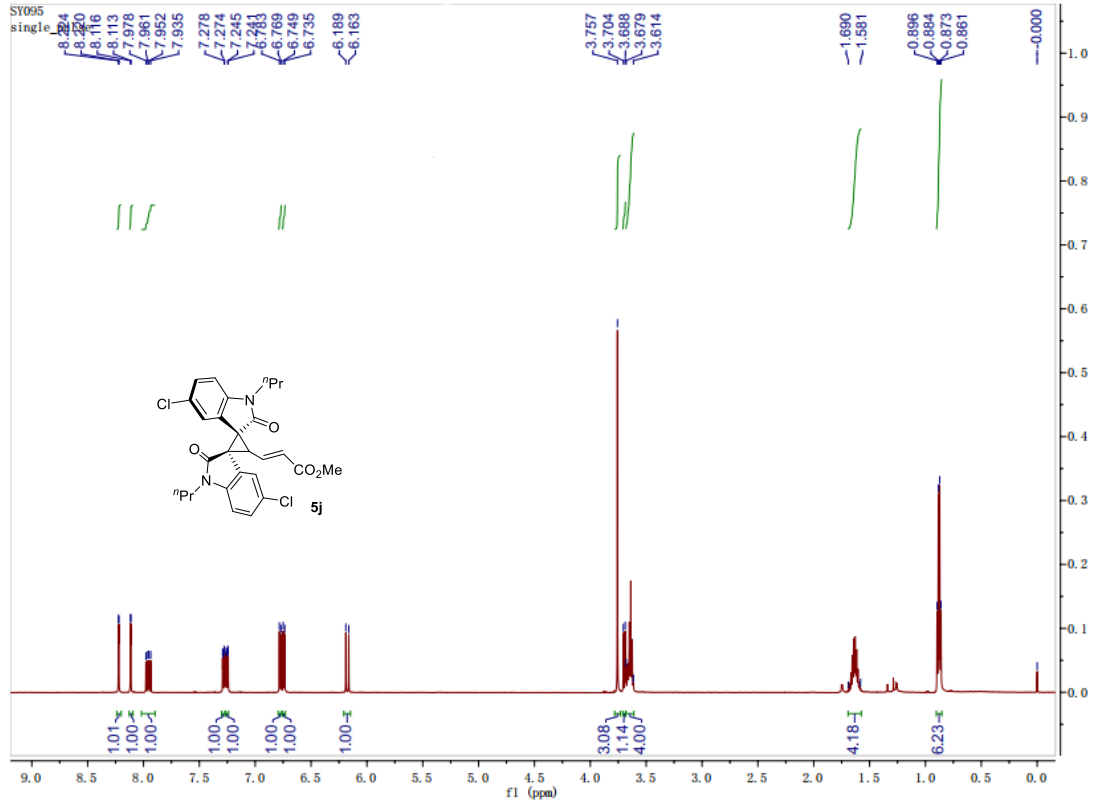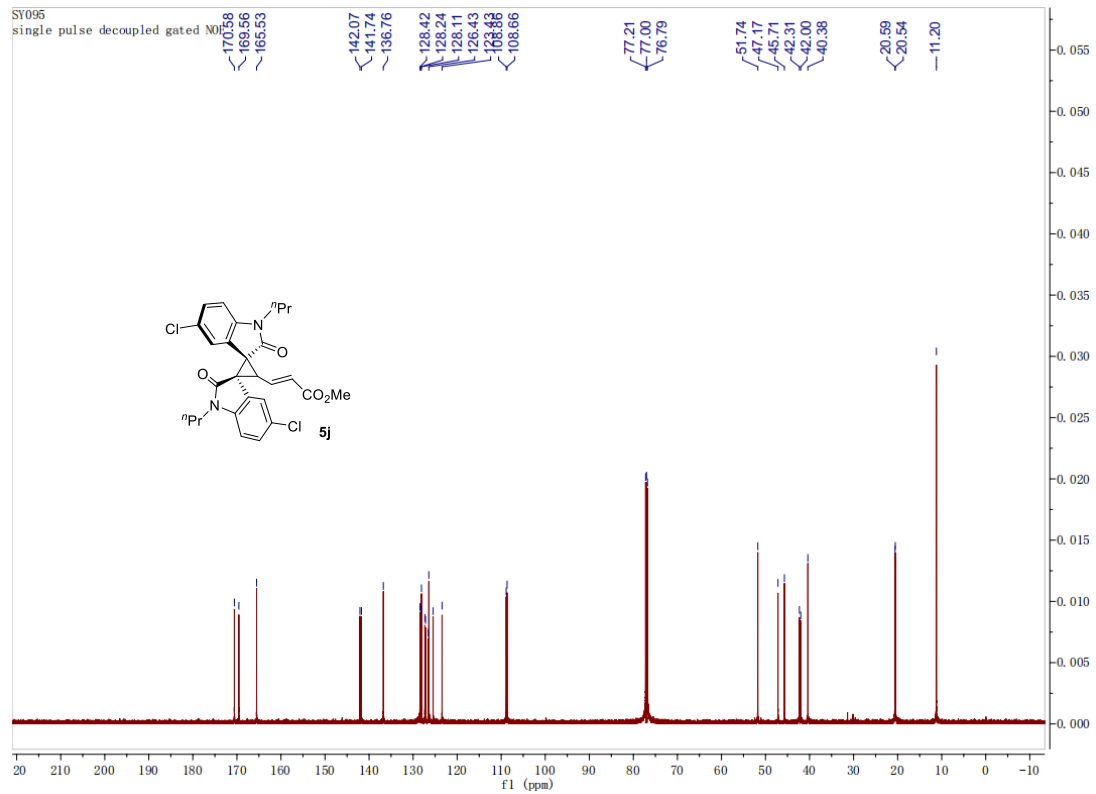

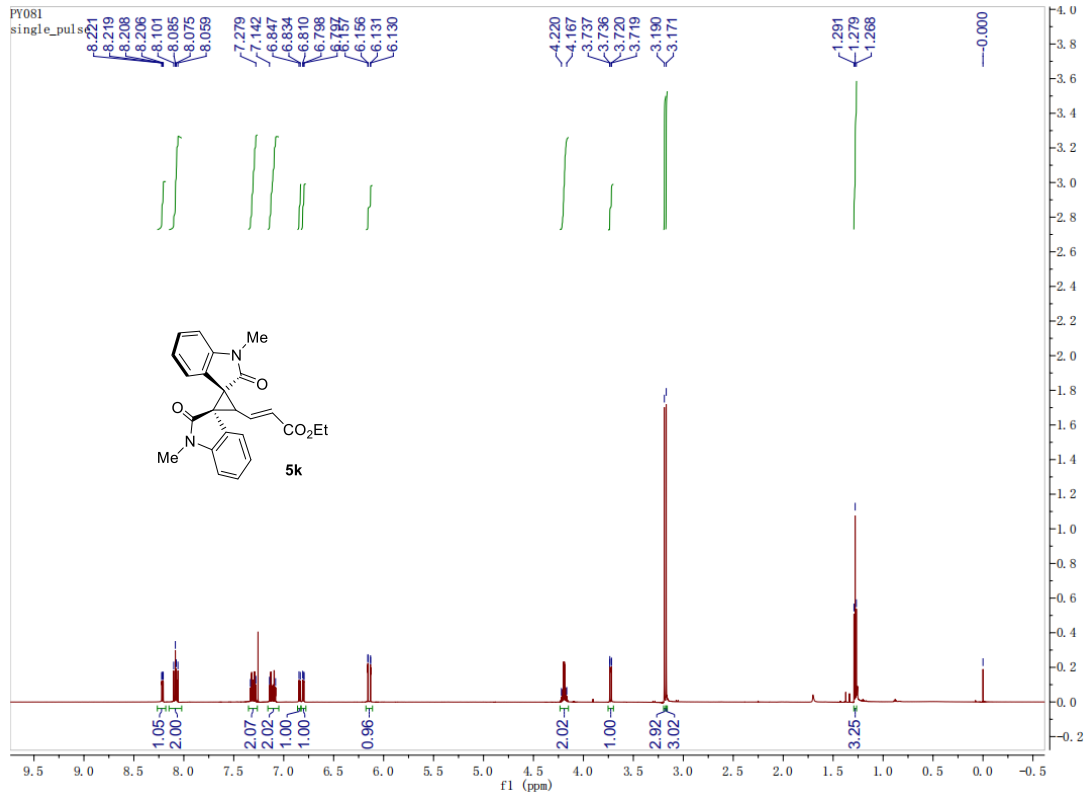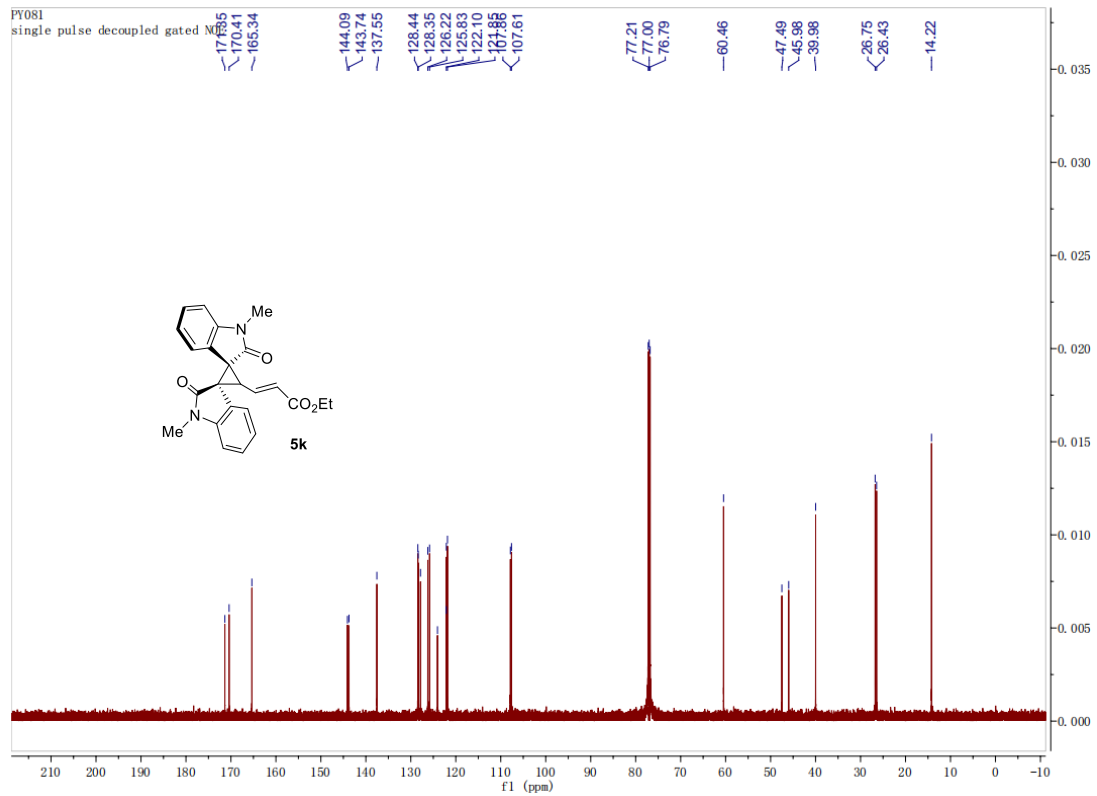

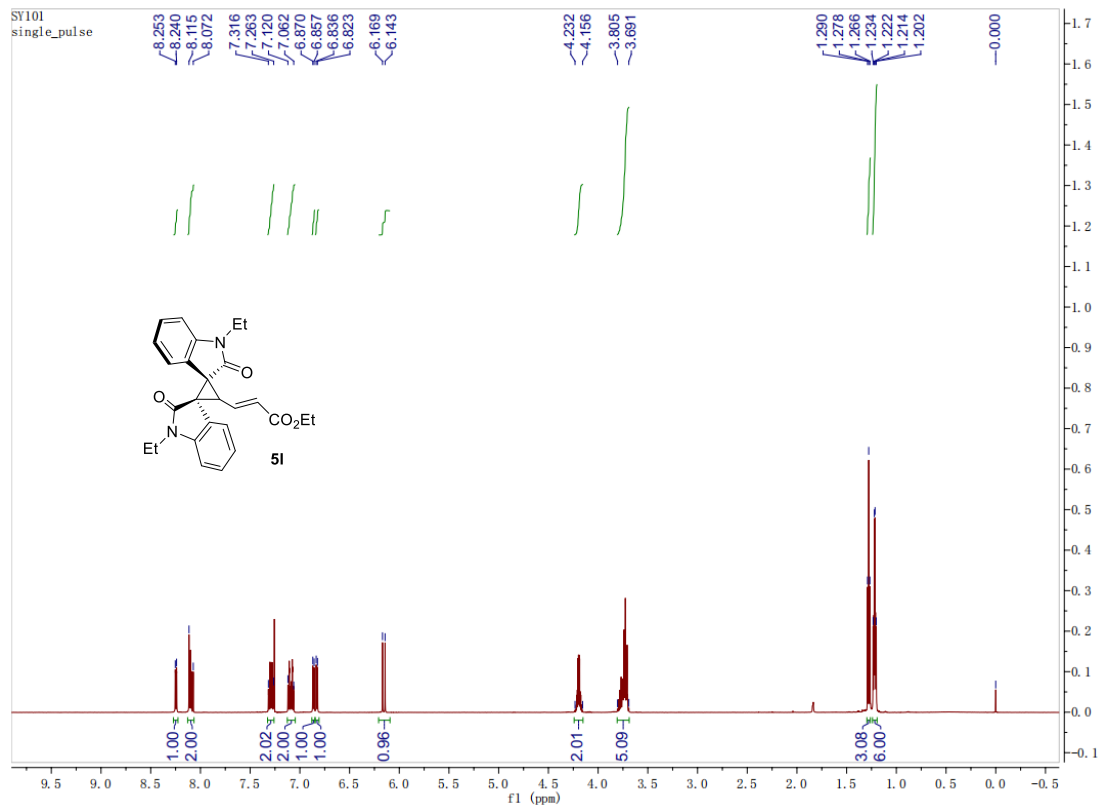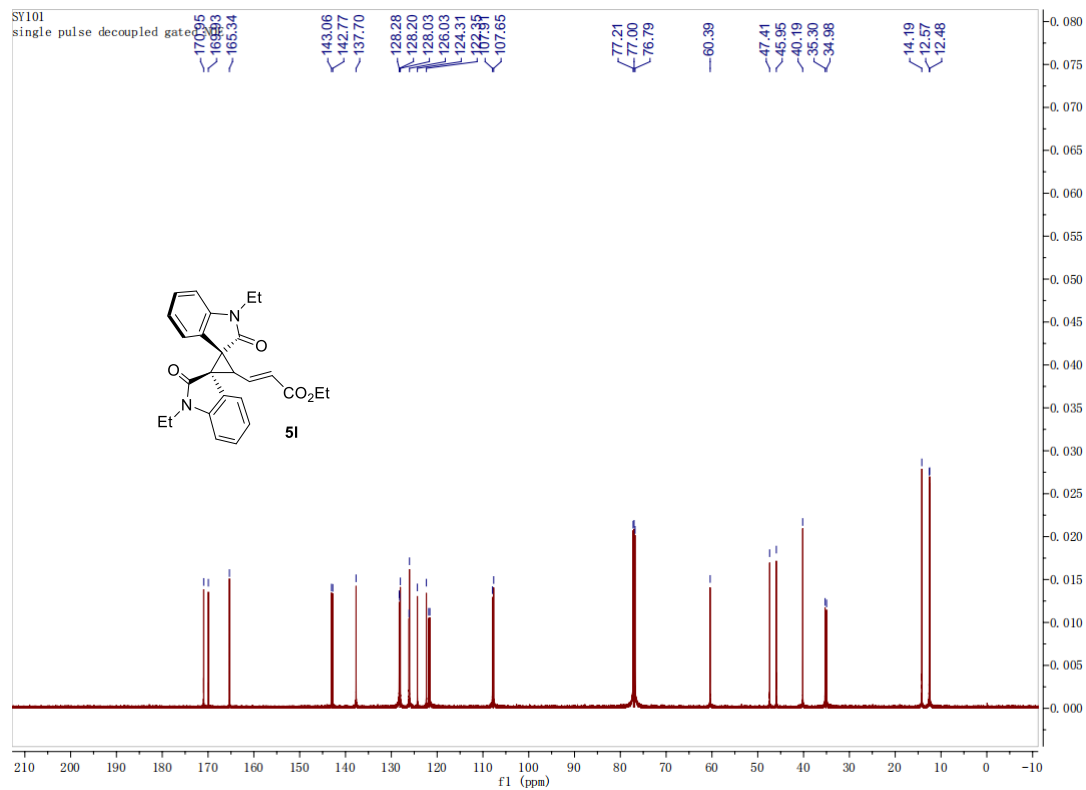

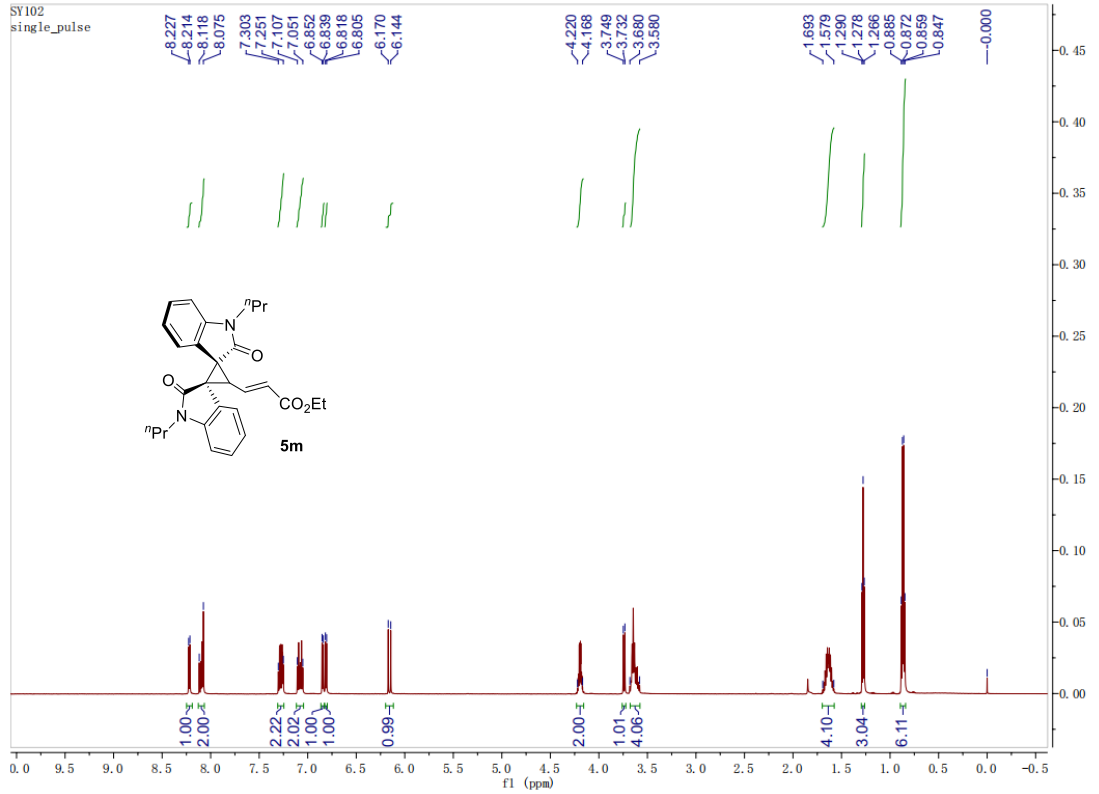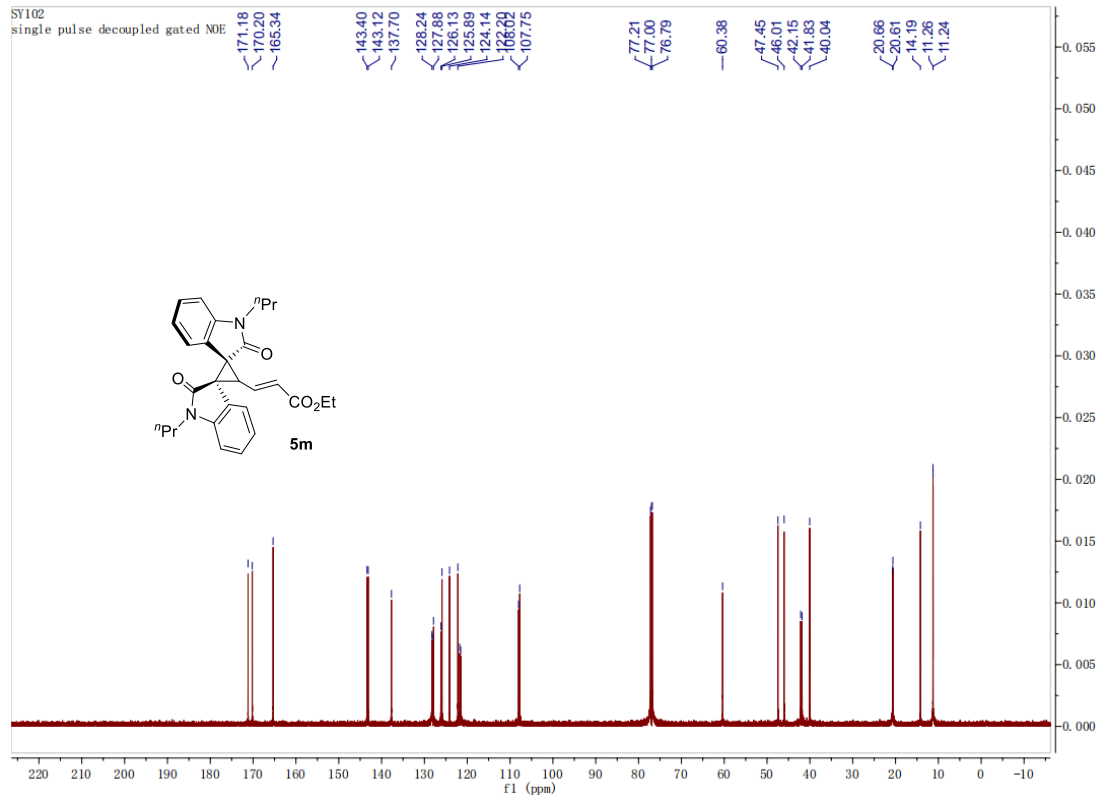

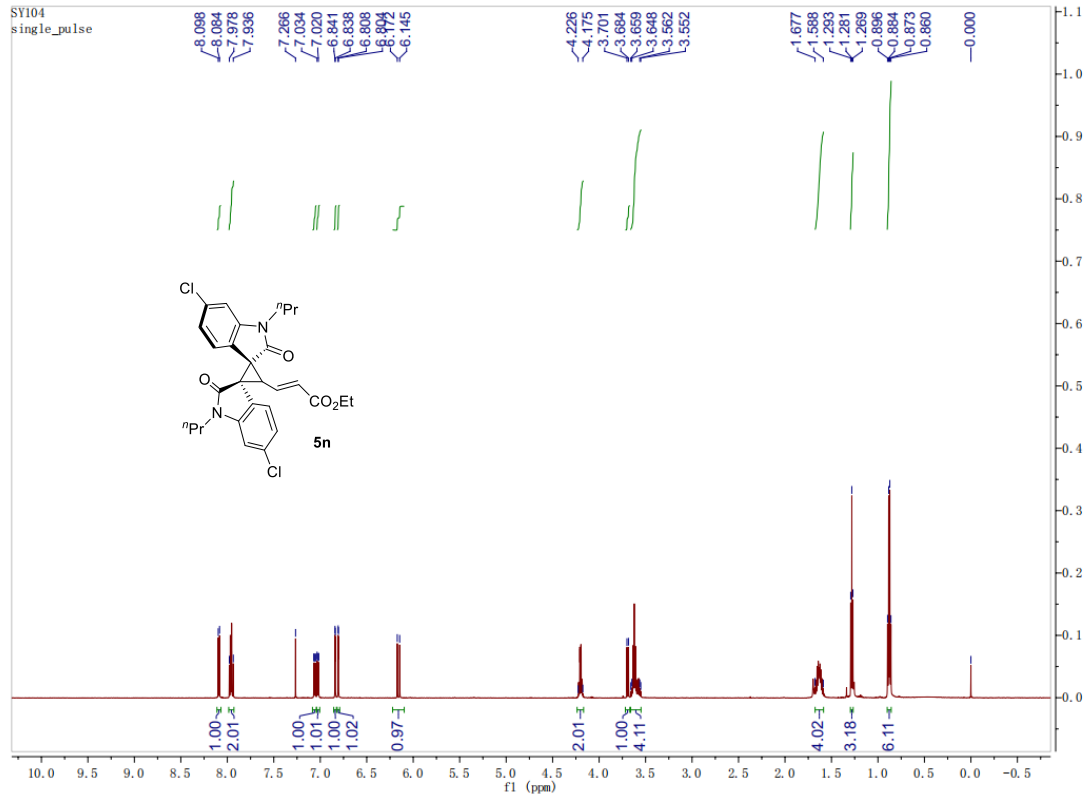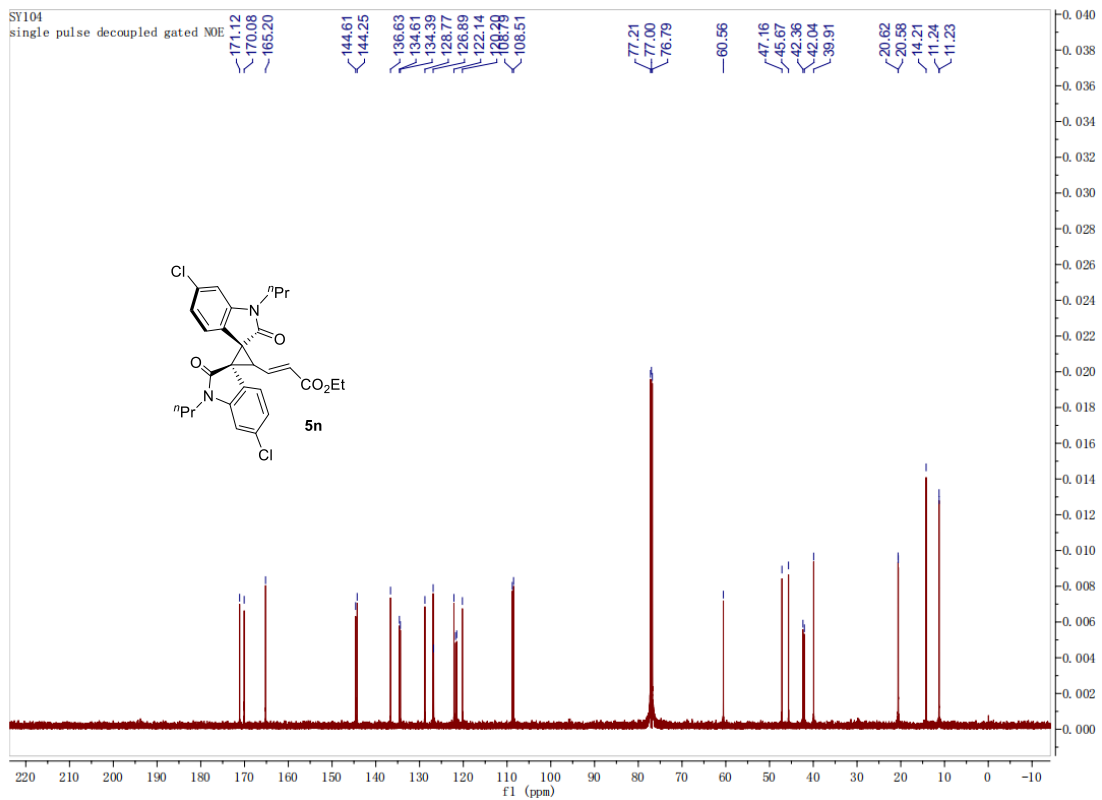

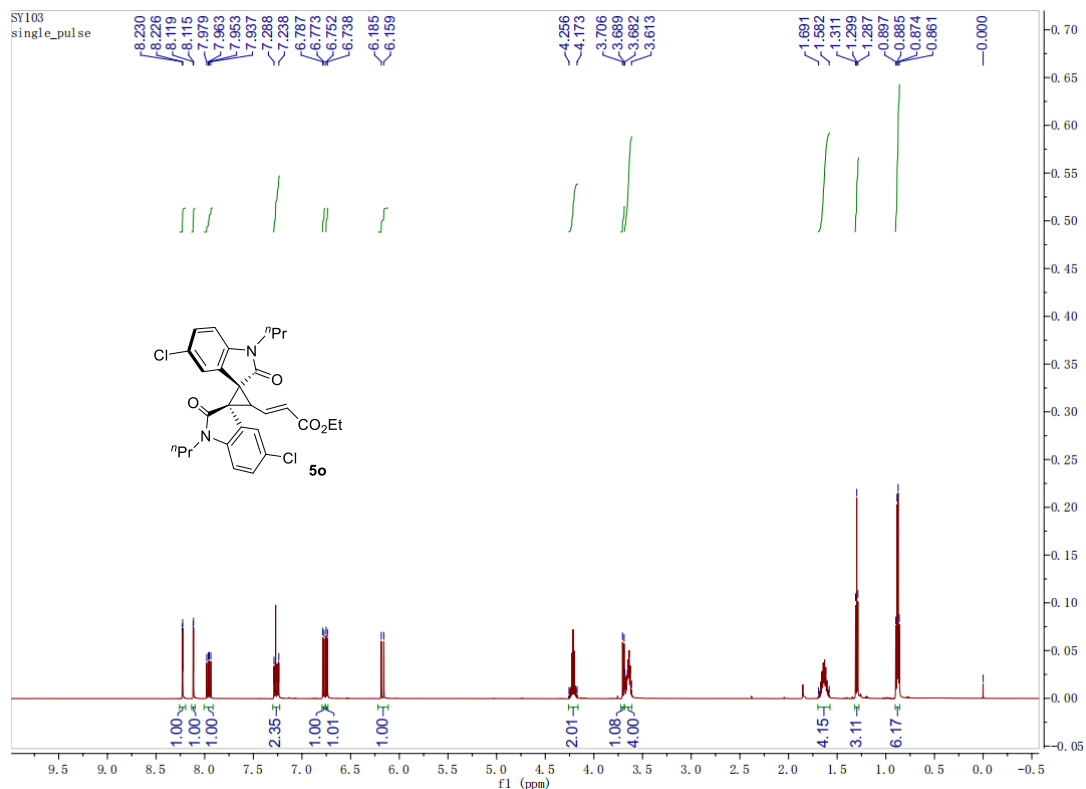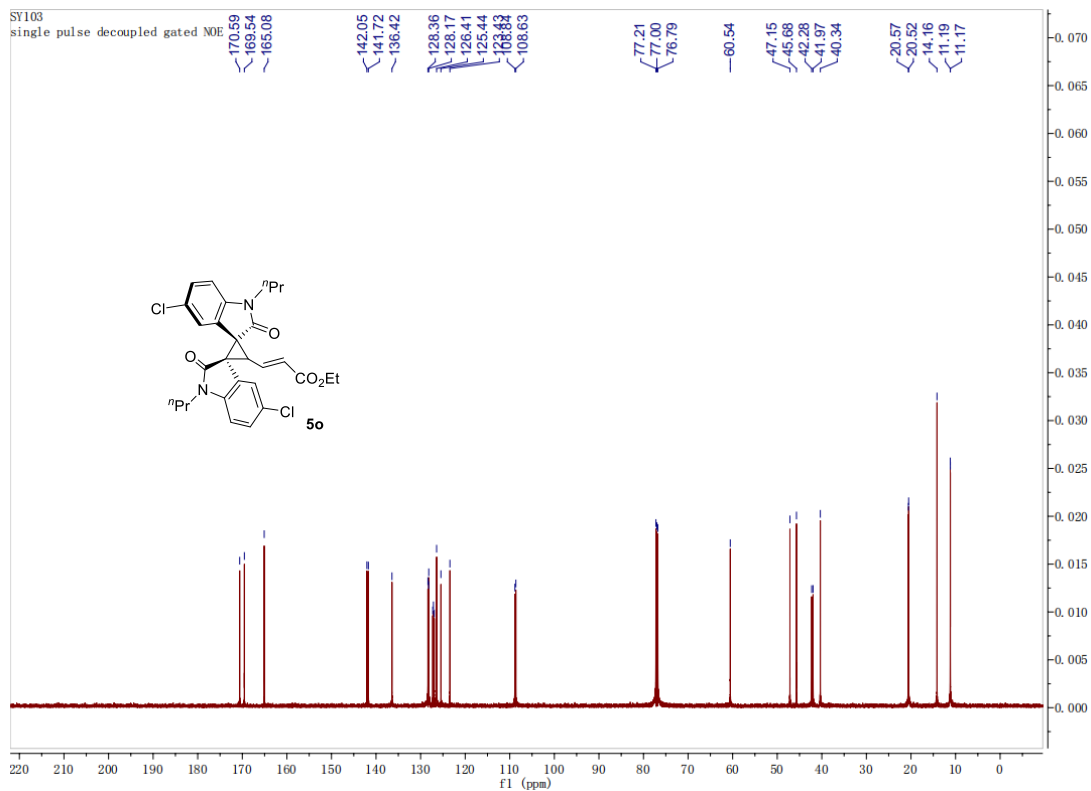



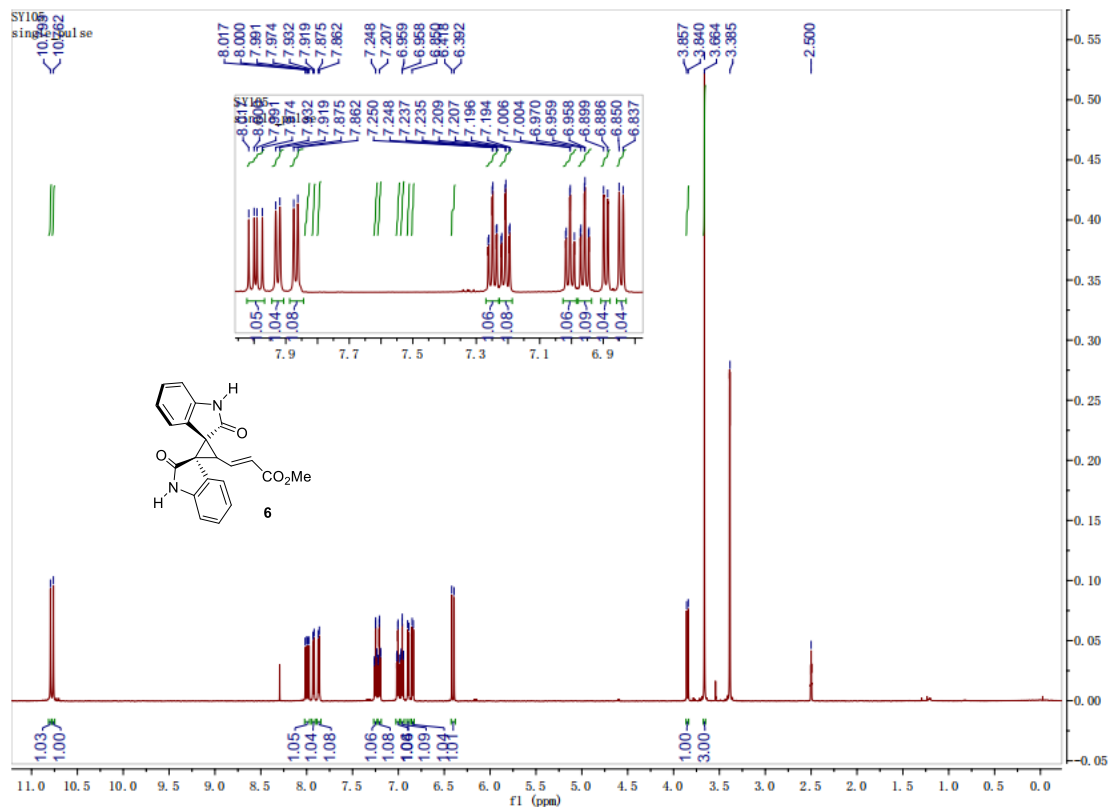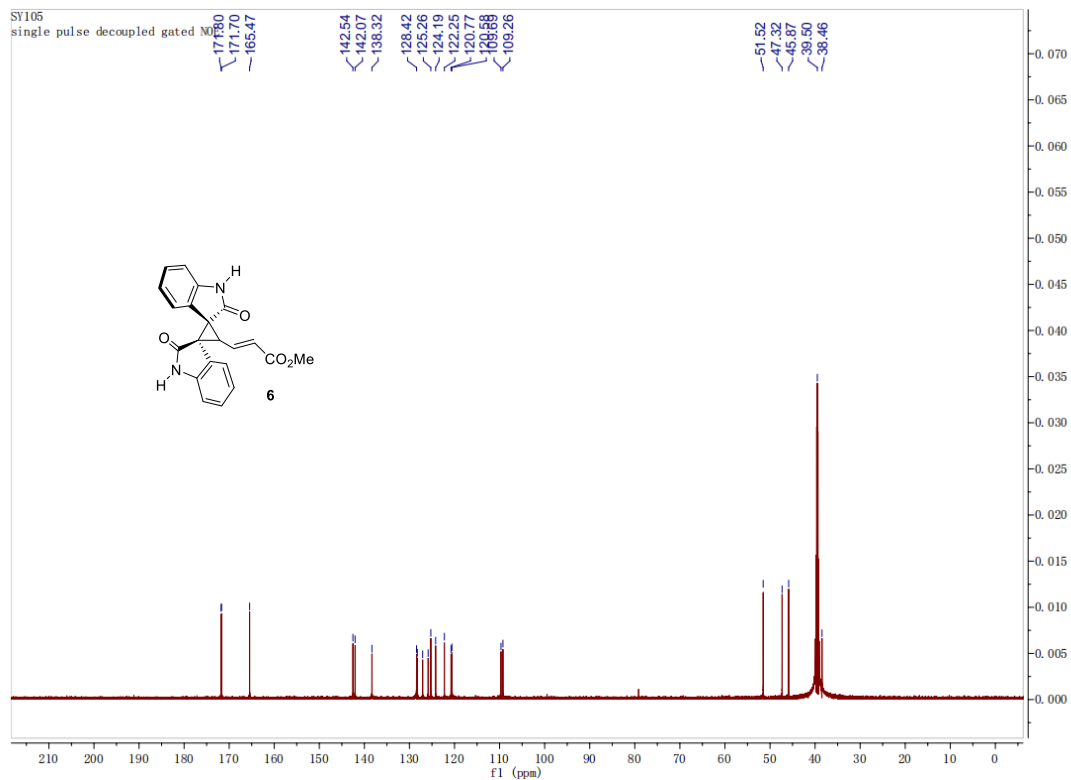

Supplement: d4ob00146j1.pdf [file d4ob00146j1.pdf]
